# Supplementary material for: In-Depth Analysis of the N-Glycome of Colorectal Cancer Cell Lines
Source: MDPI journal article supplement (doi:10.3390/ijms24054842), 2023-03-02
Supplement: s1 [file s1]

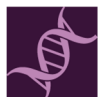

*Supplementary Information*

# In-depth Analysis of the *N*-glycome of Colorectal Cancer Cell Lines

Di Wang <sup>1,†</sup>, Valeriia Kuzyk <sup>1,2,†</sup>, Katarina Madunić <sup>1,3</sup>, Tao Zhang <sup>1</sup>, Oleg A. Mayboroda <sup>1</sup>, Manfred Wuhrer <sup>1</sup> and Guinevere S. M. Lageveen-Kammeijer <sup>1,4,\*</sup>

<sup>1</sup> Center for Proteomics and Metabolomics, Leiden University Medical Center, Postbus 9600, 2300 RC Leiden, The Netherlands

<sup>2</sup> Division of Bioanalytical Chemistry, Vrije Universiteit Amsterdam, 1081 HV Amsterdam, The Netherlands

<sup>3</sup> Department of Cellular and Molecular Medicine, Copenhagen Center for Glycomics, University of Copenhagen, 2200 Copenhagen, Denmark

<sup>4</sup> Analytical Biochemistry, Groningen Research Institute of Pharmacy, University of Groningen, 9700 AD Groningen, The Netherlands

\* Correspondence: g.s.m.kammeijer@rug.nl

† These authors contributed equally to this work.

## Contents

|                                          |    |
|------------------------------------------|----|
| Supplementary Information Figure S1..... | 2  |
| Supplementary Information Figure S2..... | 3  |
| Supplementary Information Figure S3..... | 4  |
| Supplementary Information Figure S4..... | 5  |
| Supplementary Information Figure S5..... | 14 |
| Supplementary Information Figure S6..... | 15 |
| Supplementary Information Figure S7..... | 16 |

## Supplementary Information Figure S1

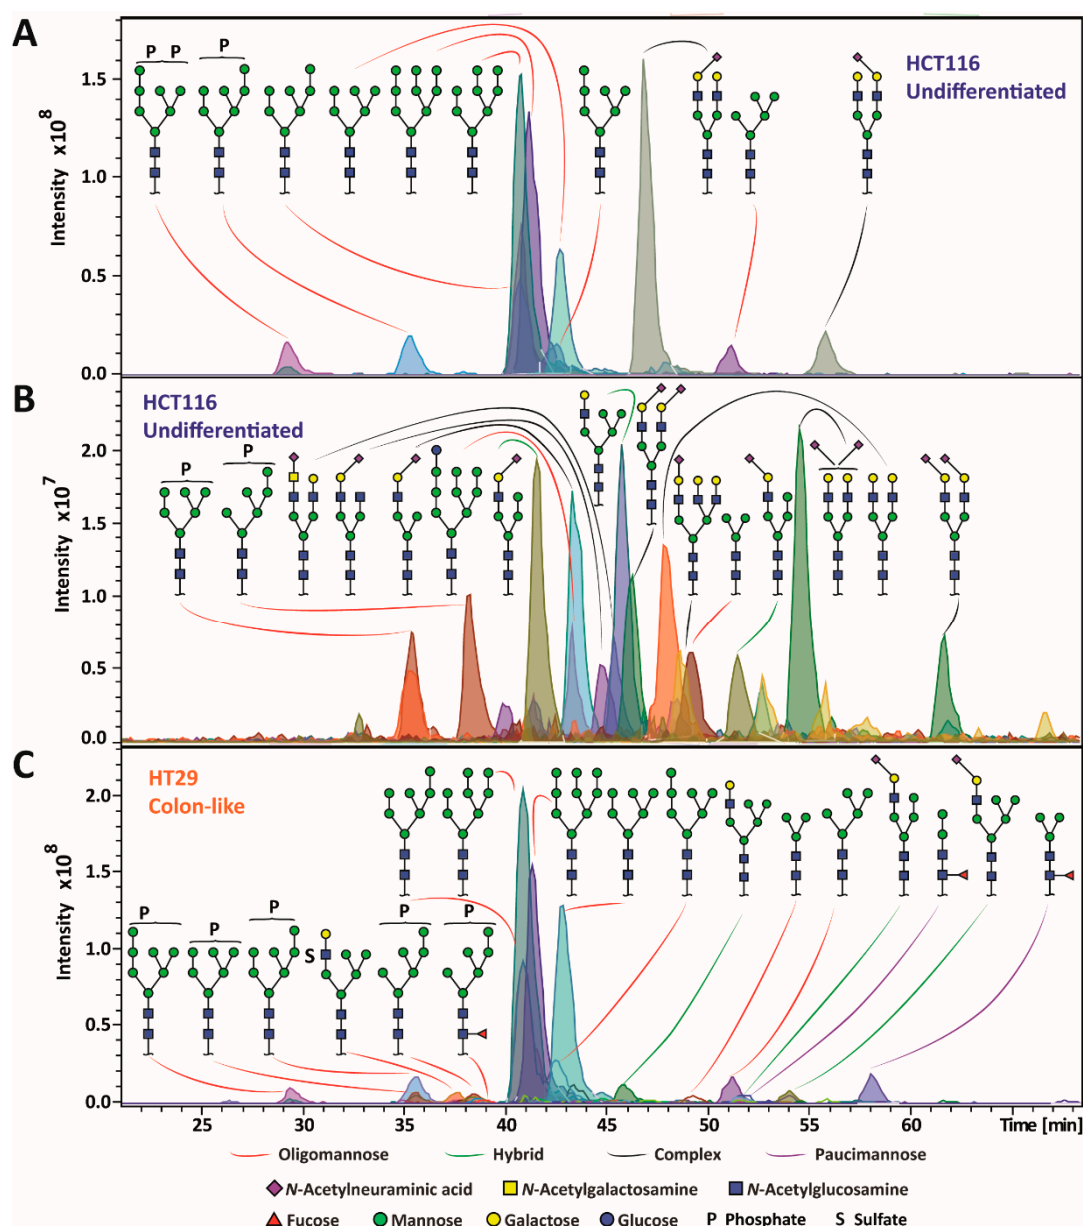

**Supplementary Information Figure S1. N-glycan profiles of two exemplary CRC cell lines.** (A, B) The undifferentiated HCT116 cell line shows a higher diversity in glycosylation. (A) The 10 most abundant of N-glycans are presented whereas (B) illustrates the lower abundant N-glycans (> 0.5% relative abundance) (C) Colon-like cell line HT29 is mainly dominated by oligomannosidic N-glycans. Sialic acid tilted to the left and right indicates  $\alpha$ 2-3 linkage and  $\alpha$ 2-6 linkage, respectively. Unidentified linkages are indicated with a sialic acid pointing vertically.



## Supplementary Information Figure S2

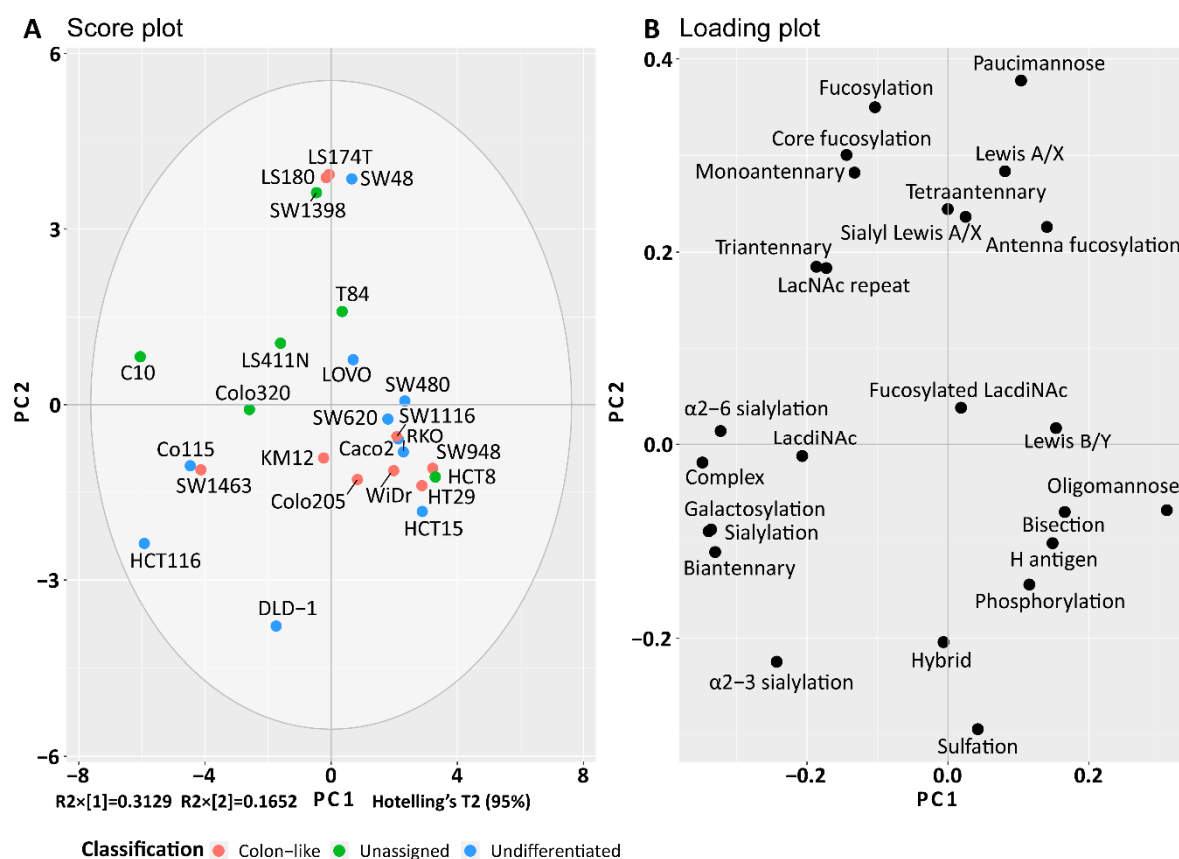

**Supplementary Information Figure S2. Principle component analysis (PCA) of N-glycosylation features in CRC cell lines.** PCA analysis was performed based on the relative quantification of glycosylation features in CRC cell lines. **(A)** Score plot of CRC cell lines colored based on cell line classifications. **(B)** The loading plot indicated the involvement of glycosylation features in the distribution of CRC cell lines in the score plot. The top two PCs hold 46.97% of the variation within the data.

## Supplementary Information Figure S3

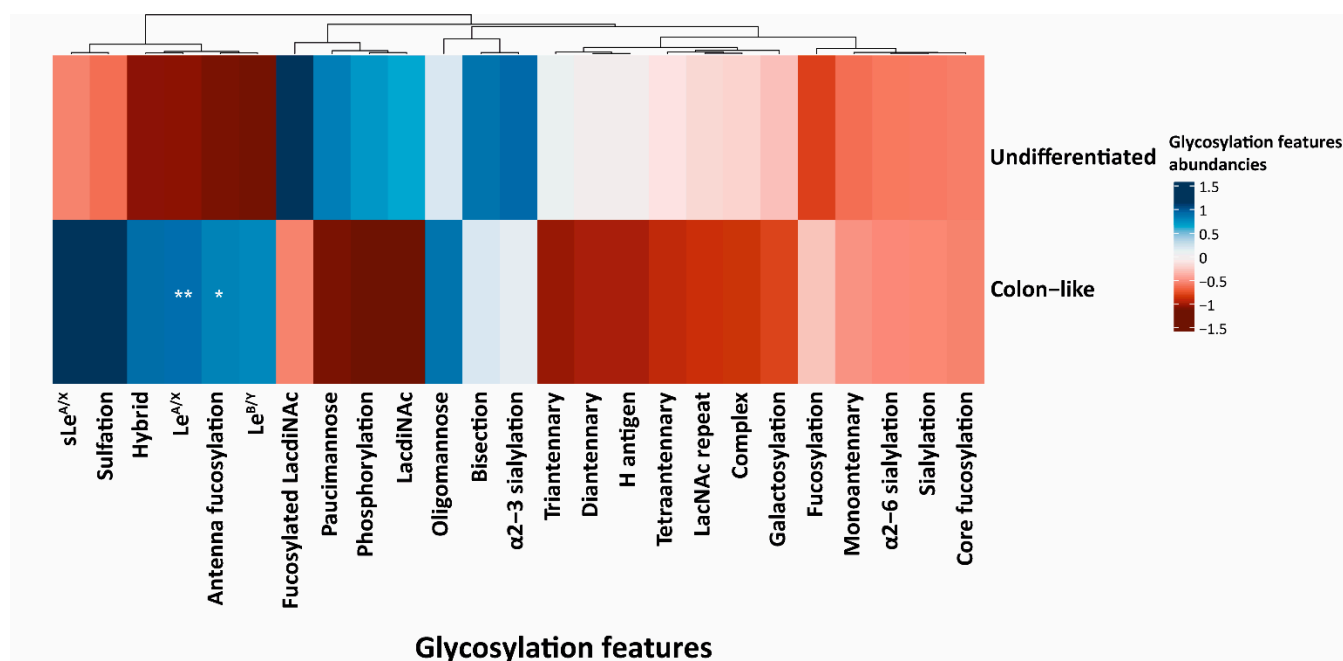

**Supplementary Information Figure S3.** Heatmap depicting the average relative abundance of glycosylation features (bottom) for CRC cell line classifications (right). The average relative abundance of each glycosylation feature was calculated. The standardization with a mean equal to zero and a standard deviation equal to one was performed. The Wilcoxon—Mann—Whitney non-parametric statistical test was applied to test differences of glycosylation features between colon-like and undifferentiated groups and p-values were corrected by the Benjamini-Hochberg method. Significant values are marked with \* ( $p \leq 0.05$ ) and \*\* ( $p \leq 0.01$ ).

## Supplementary Information Figure S4

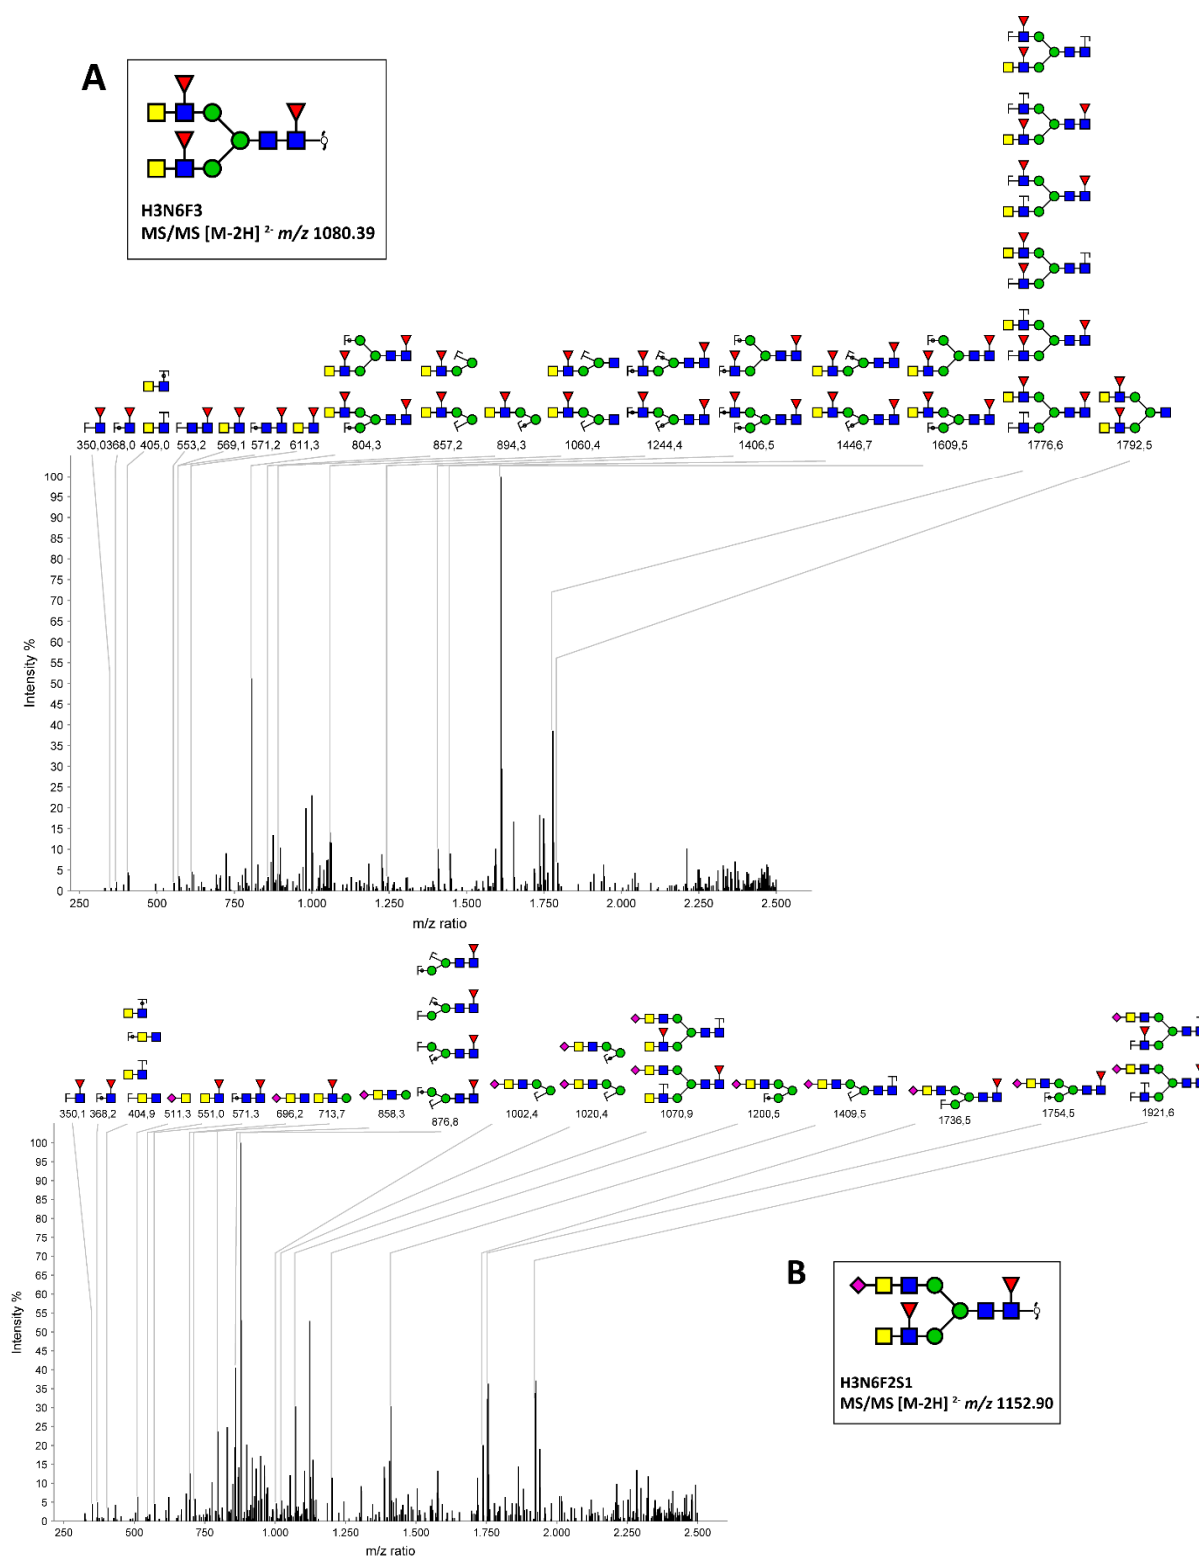

**Supplementary Information Figure S4. MS/MS spectra of the selected *N*-glycans: A)** Fucosylated LacdiNAc carried *N*-glycan with composition H3N6F3; **B)** LacdiNAc carried *N*-glycan with composition H3N6F2S1. Blue square: *N*-acetylglucosamine, green circle: mannose, yellow circle: galactose, red triangle: fucose, purple diamond: *N*-acetylneuraminic acid.

**C**

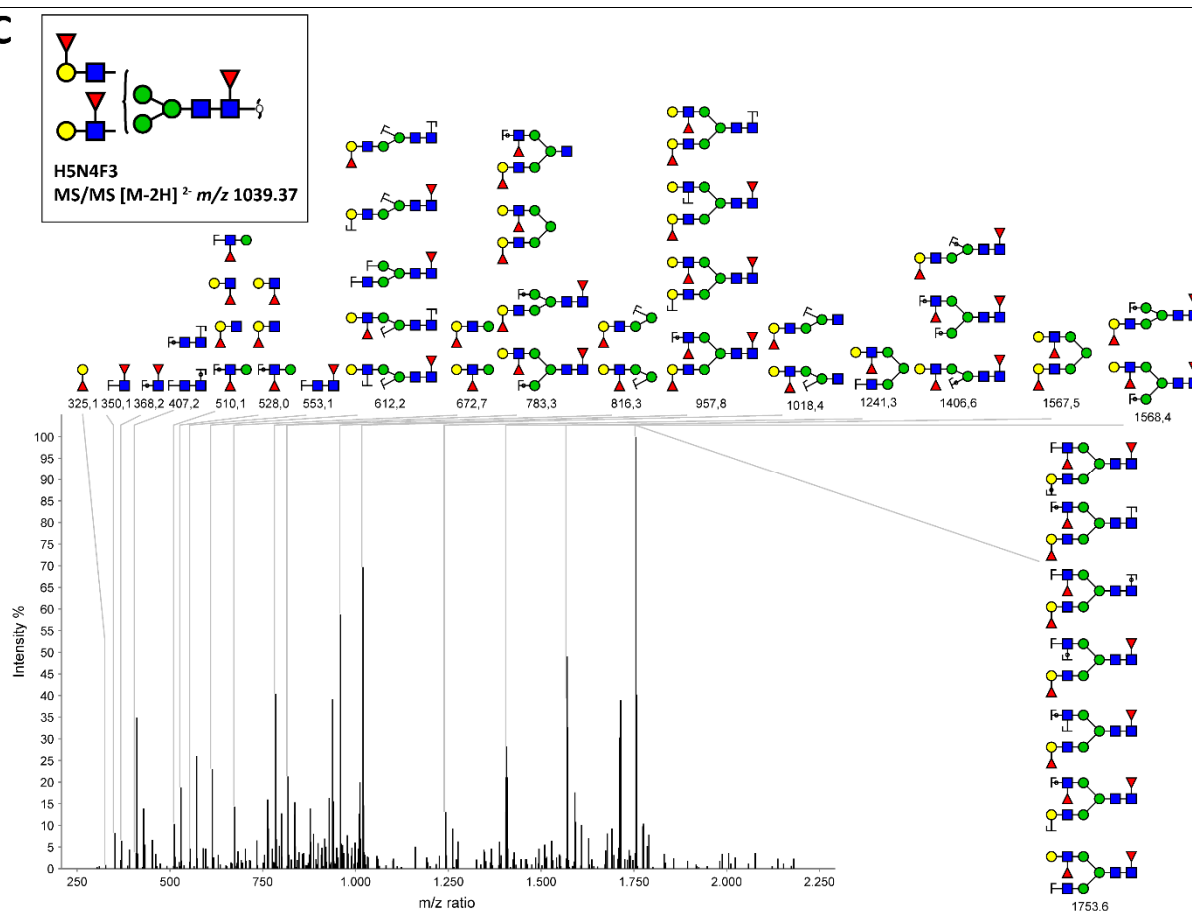

**Supplementary Information Figure S4. MS/MS spectra of the selected *N*-glycans (continued): C) *N*-glycan carrying H antigen and Lewis antigen with composition H5N4F3. Blue square: *N*-acetylglucosamine, green circle: mannose, yellow circle: galactose, red triangle: fucose, purple diamond: *N*-acetylneuraminic acid.**

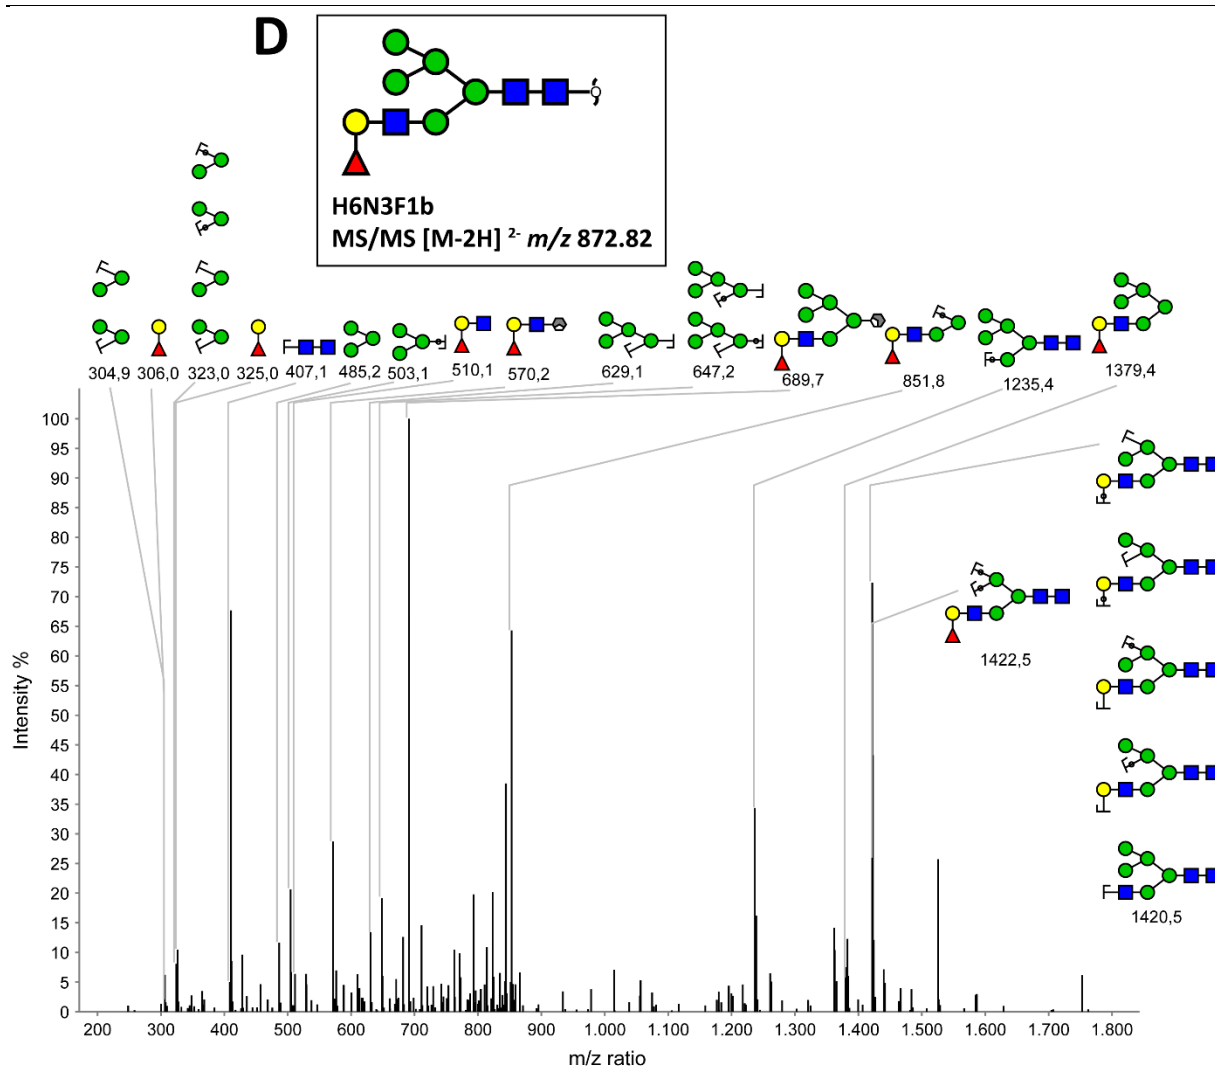

**Supplementary Information Figure S4. MS/MS spectra of the selected *N*-glycans (continued): D) *N*-glycan carrying H antigen with composition H6N3F1b. Blue square: *N*-acetylglucosamine, green circle: mannose, yellow circle: galactose, red triangle: fucose.**

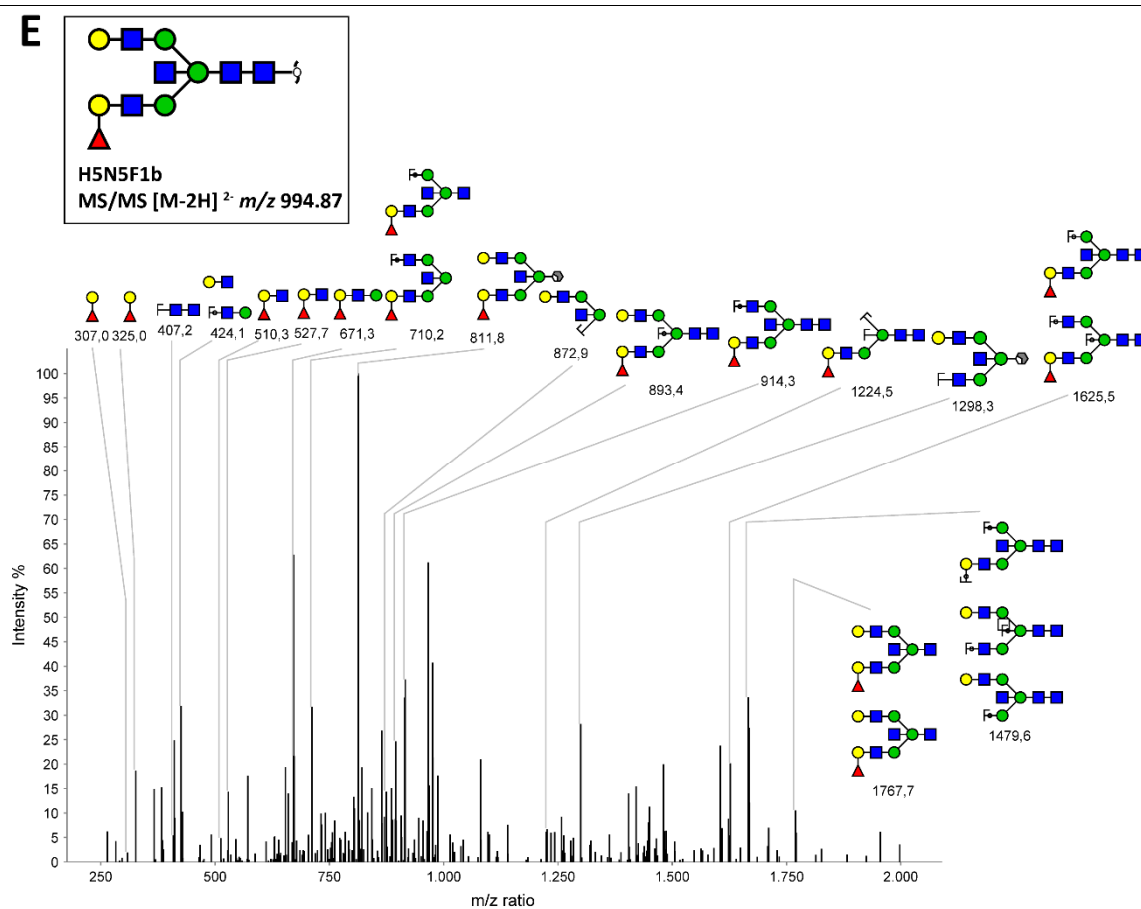

**Supplementary Information Figure S4. MS/MS spectra of the selected *N*-glycans (continued): E) *N*-glycan carrying H antigen with composition H5N5F1b. Blue square: *N*-acetylglucosamine, green circle: mannose, yellow circle: galactose, red triangle: fucose.**



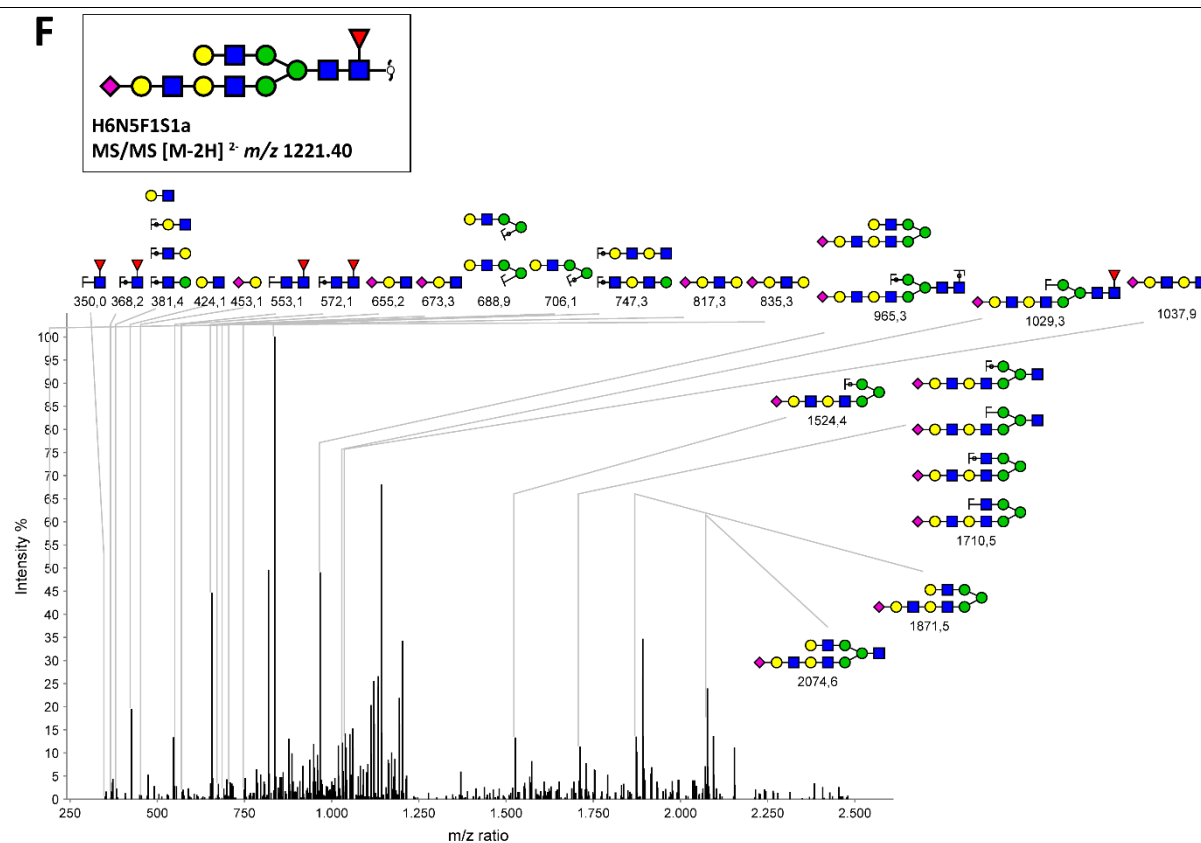

**Supplementary Information Figure S4. MS/MS spectra of the selected *N*-glycans (continued): F)** Repeated LacNAc carried *N*-glycan with composition H6N5F1S1a; Blue square: *N*-acetylglucosamine, green circle: mannose, yellow circle: galactose, red triangle: fucose, purple diamond: *N*-acetylneuraminic acid.

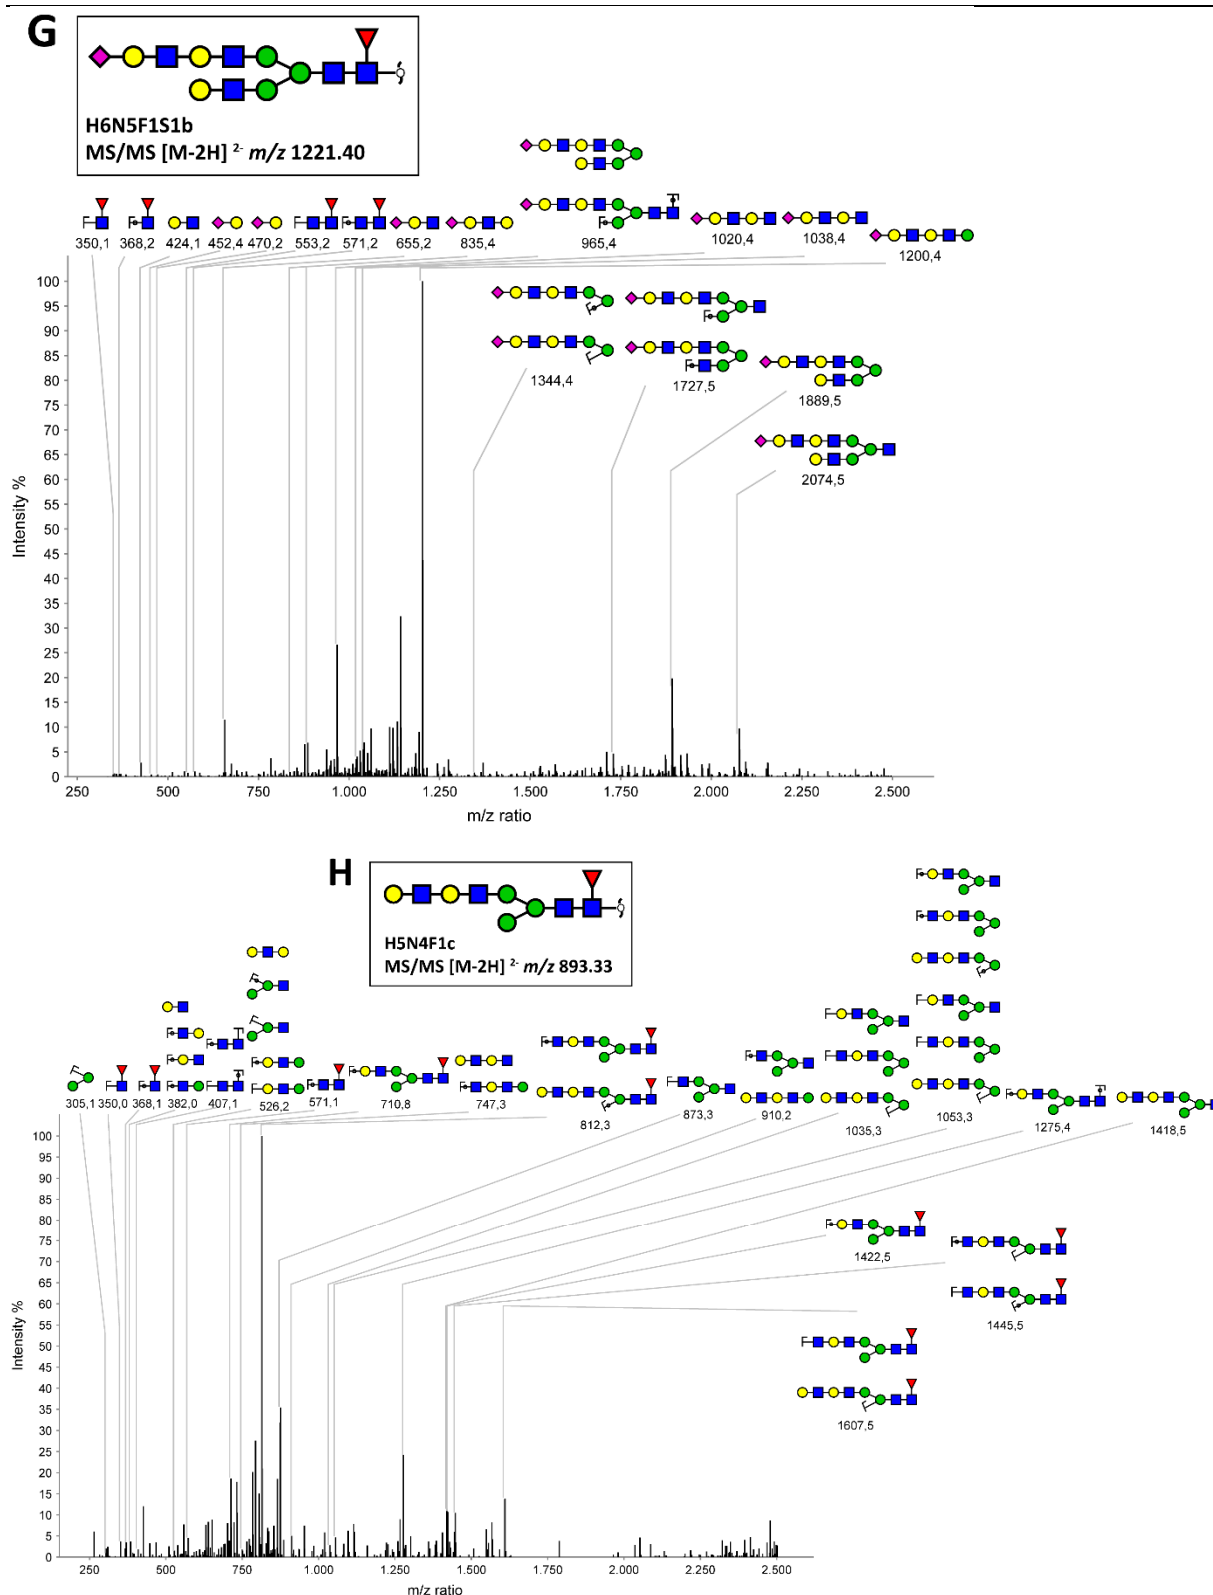

**Supplementary Information Figure S4. MS/MS spectra of the selected *N*-glycans(continued): G)** Repeated LacNAc carried *N*-glycan with composition H6N5F1S1b; **H)** Repeated LacNAc carried *N*-glycan with composition H5N4F1c. Blue square: *N*-acetylglucosamine, green circle: mannose, yellow circle: galactose, red triangle: fucose, purple diamond: *N*-acetylneuraminic acid.

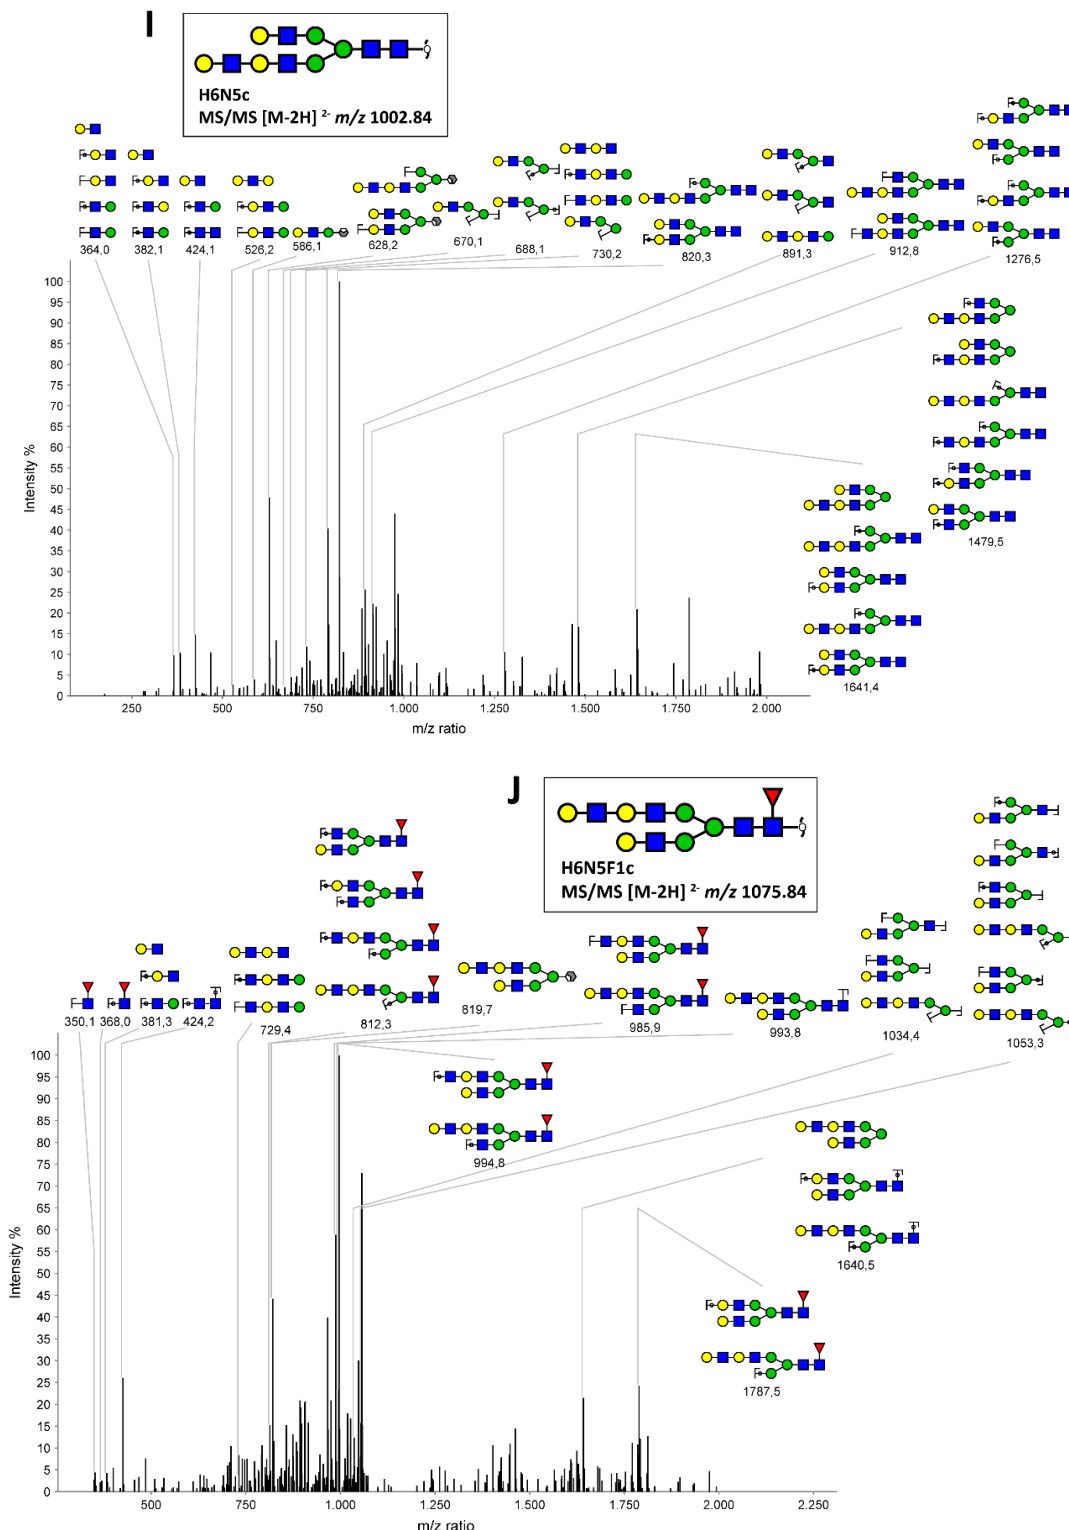

**Supplementary Information Figure S4. MS/MS spectra of the selected *N*-glycans (continued): I)** Repeated LacNAc carried *N*-glycan with composition H6N5c; **J)** Repeated LacNAc carried *N*-glycan with composition H6N5F1c. Blue square: *N*-acetylglucosamine, green circle: mannose, yellow circle: galactose, red triangle: fucose.

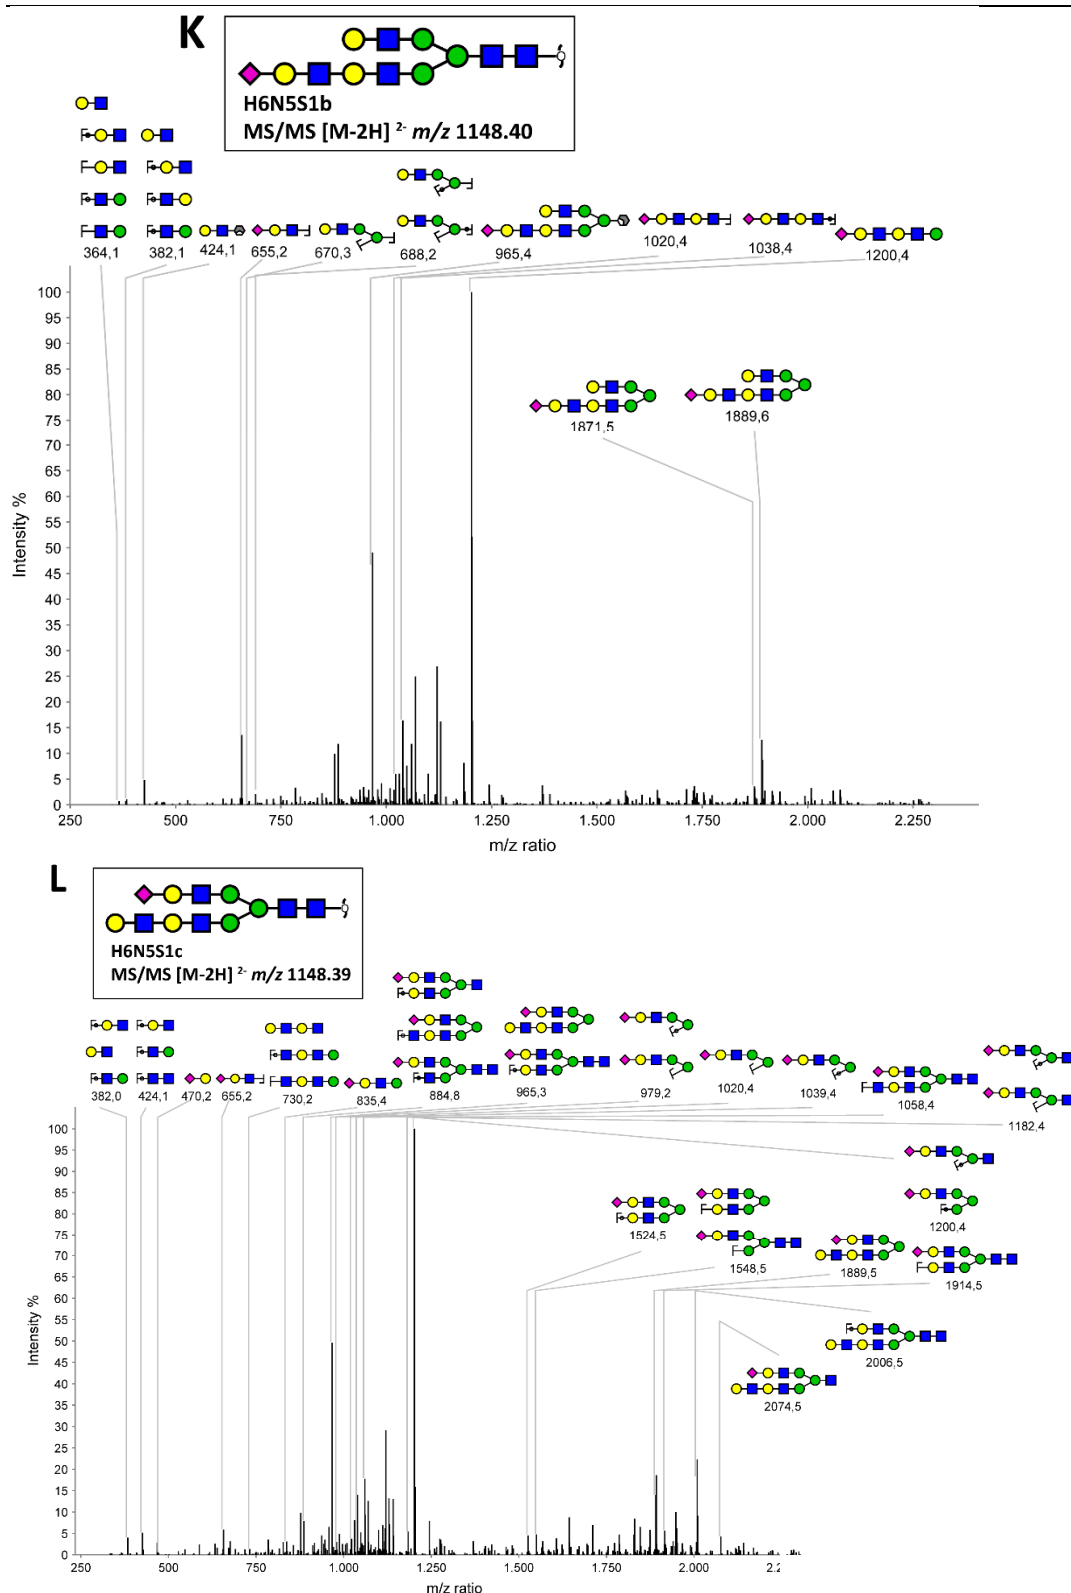

**Supplementary Information Figure S4. MS/MS spectra of the selected *N*-glycans (continued): K)** Repeated LacNAc carried *N*-glycan with composition H6N5S1b; **L)** Repeated LacNAc carried *N*-glycan with composition H6N5S1c. Blue square: *N*-acetylglucosamine, green circle: mannose, yellow circle: galactose, red triangle: fucose, purple diamond: *N*-acetylneuraminic acid.

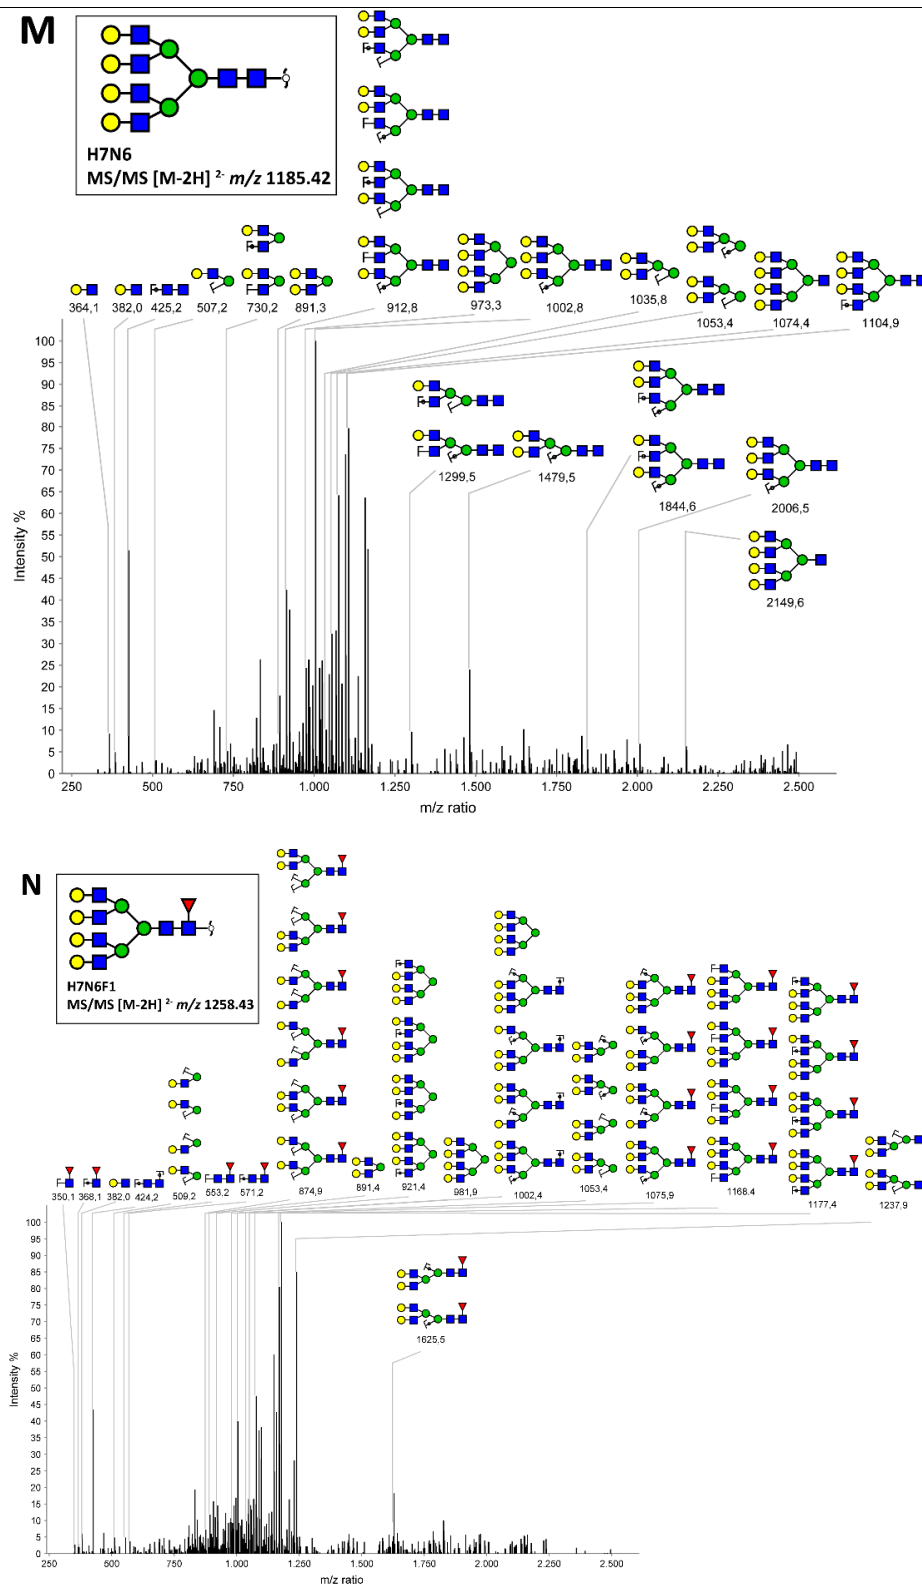

**Supplementary Information Figure S4. MS/MS spectra of the selected *N*-glycans: M) tetraantennary *N*-glycan with composition H7N6. N) tetraantennary *N*-glycan with composition H7N6F1. Blue square: *N*-acetylglucosamine, green circle: mannose, yellow circle: galactose, red triangle: fucose.**

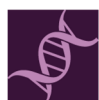

## Supplementary Information Figure S5

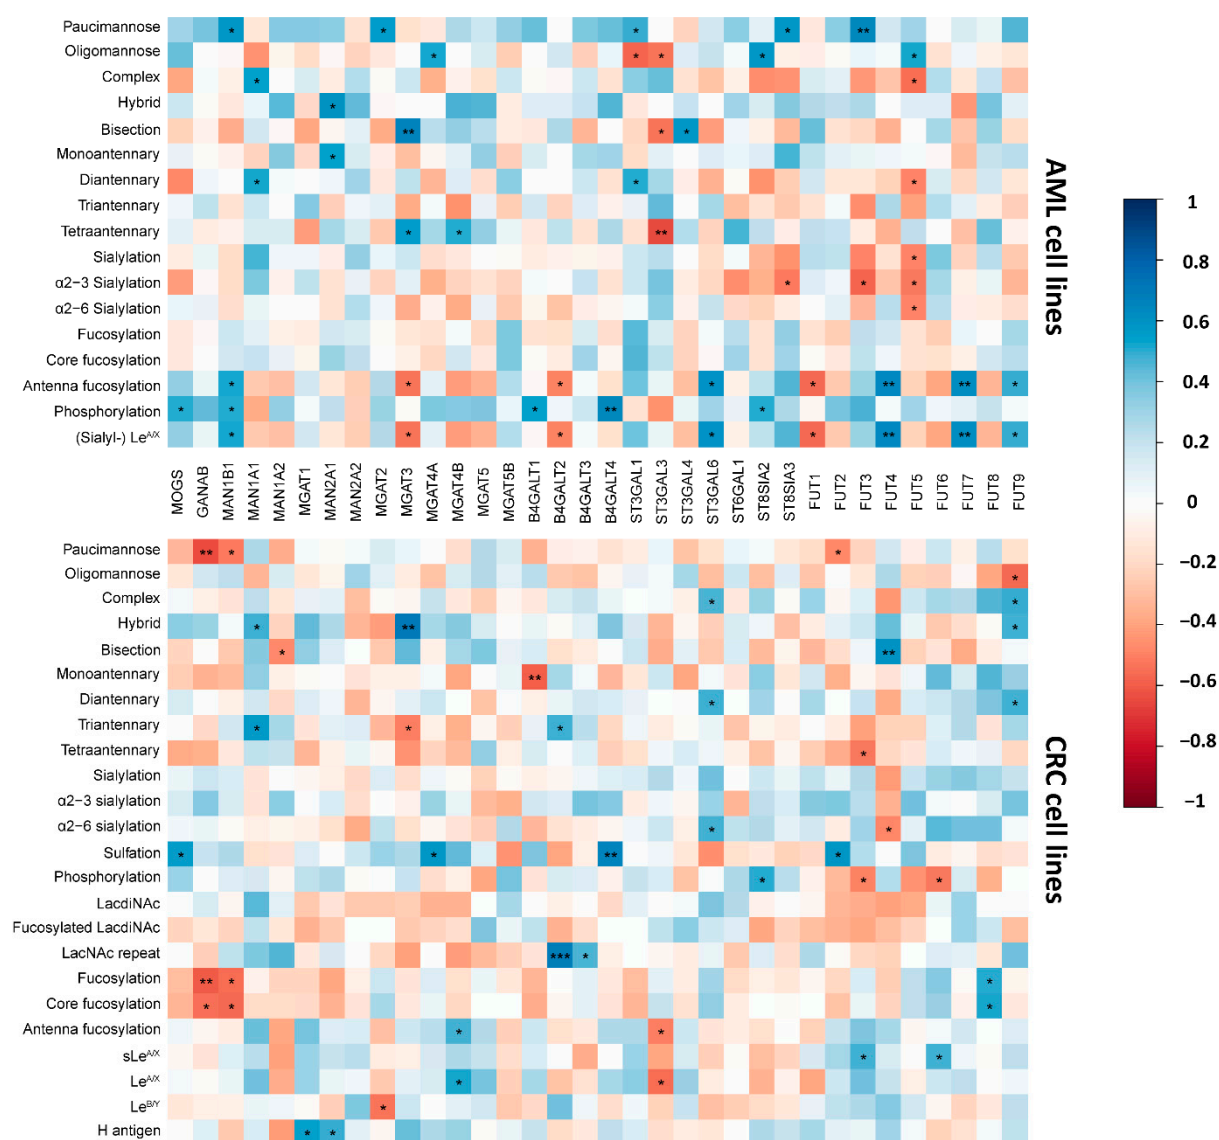

**Supplementary Information Figure S5. Correlations of glycosylation with relevant GTs and differences of glycosylation features in CRC [1] and AML cell lines [2].** Correlation analysis was conducted between glycosylation features (relative quantification %) and corresponding GTs in CRC cell lines with the Spearman method.



## Supplementary Information Figure S6

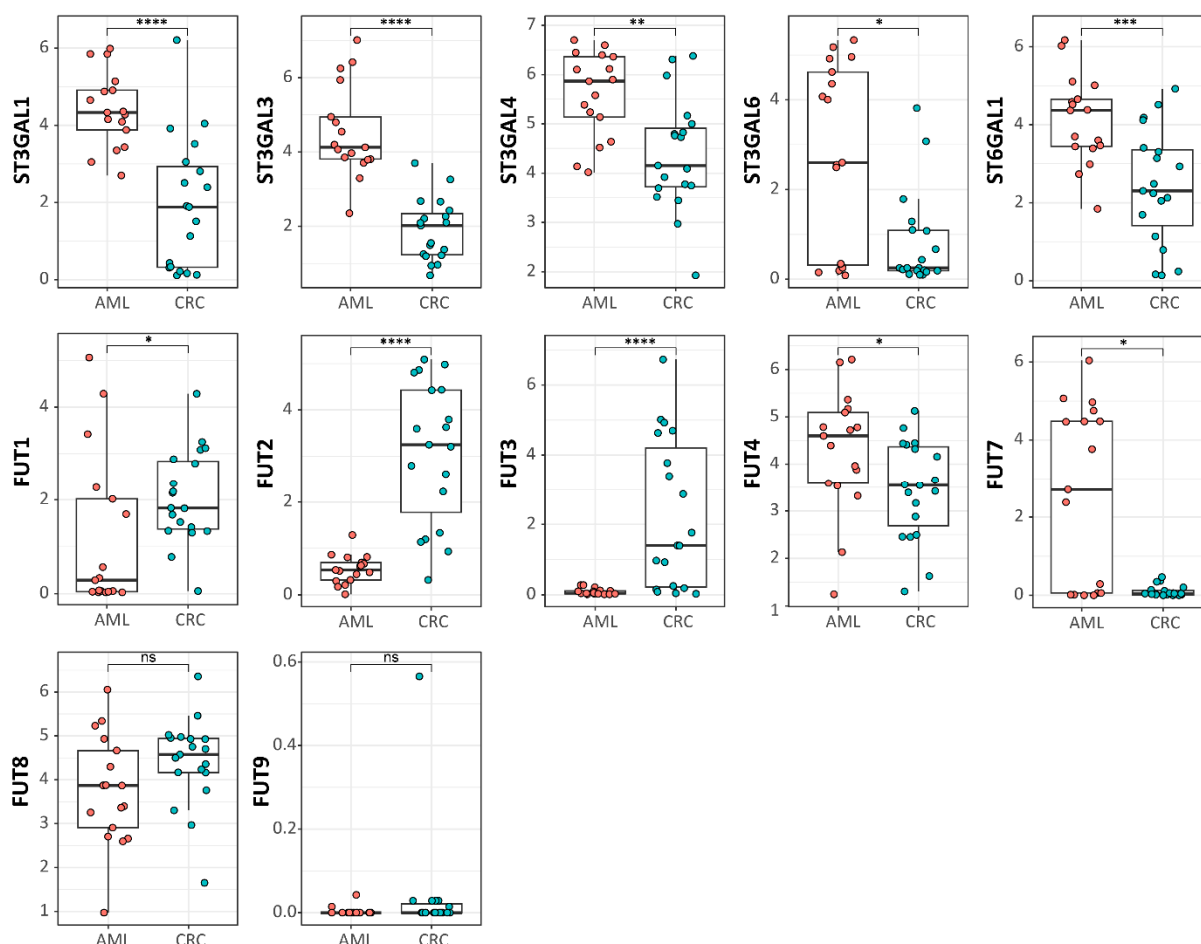

**Supplementary Information Figure S6.** The difference of transcriptomic expression levels of GTs between AML and CRC cell lines. The mRNA transcriptomics data of GTs of AML and CRC cell lines was extracted from a public dataset.[2] The difference were tested with Wilcoxon-Mann-Whitney non-parametric statistical test. P-values were corrected by the Benjamini-Hochberg method. Significant values are marked with \* ( $p \leq 0.05$ ), \*\* ( $p \leq 0.01$ ), \*\*\* ( $p \leq 0.001$ ) and \*\*\*\* ( $p \leq 0.0001$ ). ns: not significant.

## Supplementary Information Figure S7

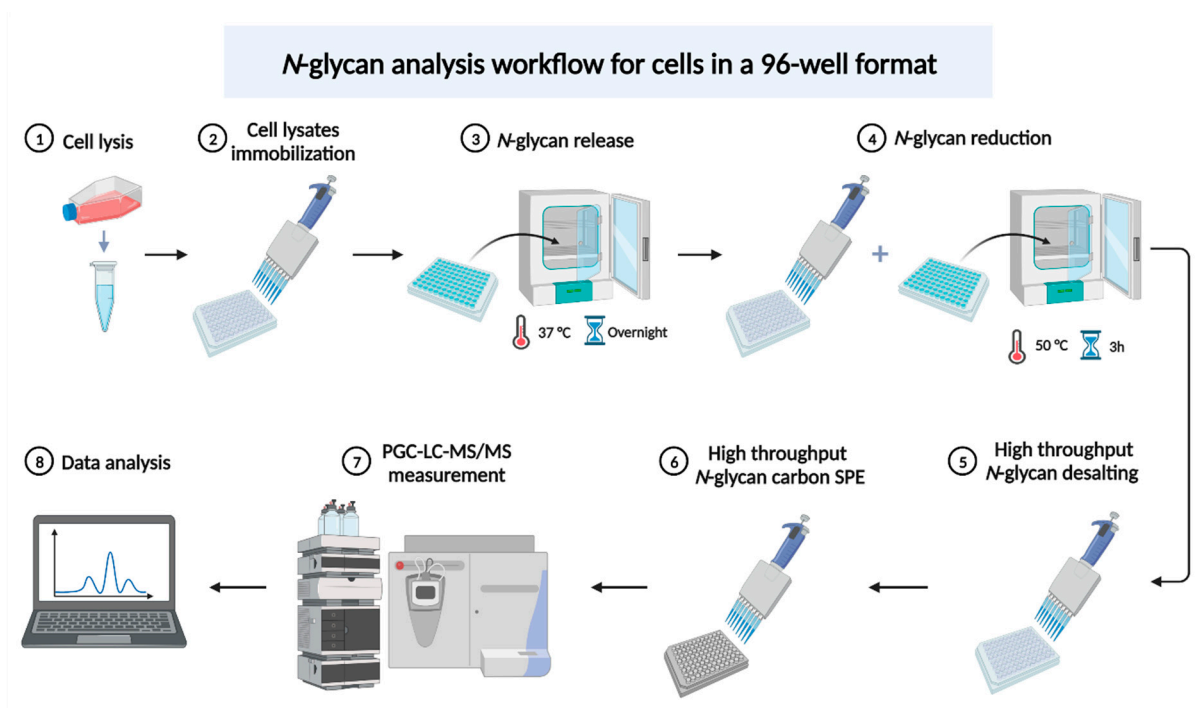

**Supplementary Information Figure S7. N-glycan analysis workflow for cells in a 96-well format.**  
(Created with BioRender.com)

### References

1. Berg, K.C.G., et al., *Multi-omics of 34 colorectal cancer cell lines - a resource for biomedical studies*. *Mol Cancer*, 2017. **16**(1): p. 116.
2. Tsherniak, A., et al., *Defining a Cancer Dependency Map*. *Cell*, 2017. **170**(3): p. 564-576 e16.
