# Supplementary material for: In-Depth Analysis of the N-Glycome of Colorectal Cancer Cell Lines
Source: Int J Mol Sci. 2023 Mar 2;24(5):4842. doi: 10.3390/ijms24054842 (PMC10003090; doi:10.3390/ijms24054842)
Supplement: Supplementary file 1 [file ijms-24-04842-s001.zip › Supplementary tables.xlsx]

## Sheet: TOC
Table of Content for Supporting Information Tables
Table S1.
	Relative abundances (%) of N-glycans in each sample.
Table S2
	Table S2-1.
		N-glycans present in the Caco2 cell line, retention times (min), peak areas, relative abundances with standard deviation and relative standard deviation (CV), and calculations of monosaccharide average compositions for each technical replicate.
	Table S2-2.
		N-glycans present in Co115 cell line, retention times (min), peak areas, relative abundances with standard deviation and relative standard deviation (CV), and calculations of monosaccharide average compositions for each technical replicate.
	Table S2-3.
		N-glycans present in Colo205 cell line, retention times (min), peak areas, relative abundances with standard deviation and relative standard deviation (CV), and calculations of monosaccharide average compositions for each technical replicate.
	Table S2-4.
		N-glycans present in DLD-1 cell line, retention times (min), peak areas, relative abundances with standard deviation and relative standard deviation (CV), and calculations of monosaccharide average compositions for each technical replicate.
	Table S2-5.
		N-glycans present in HCT15 cell line, retention times (min), peak areas, relative abundances with standard deviation and relative standard deviation (CV), and calculations of monosaccharide average compositions for each technical replicate.
	Table S2-6.
		N-glycans present in HCT116 cell line, retention times (min), peak areas, relative abundances with standard deviation and relative standard deviation (CV), and calculations of monosaccharide average compositions for each technical replicate.
	Table S2-7.
		N-glycans present in RKO cell line, retention times (min), peak areas, relative abundances with standard deviation and relative standard deviation (CV), and calculations of monosaccharide average compositions for each technical replicate.
	Table S2-8.
		N-glycans present in SW48 cell line, retention times (min), peak areas, relative abundances with standard deviation and relative standard deviation (CV), and calculations of monosaccharide average compositions for each technical replicate.
	Table S2-9.
		N-glycans present in SW480 cell line, retention times (min), peak areas, relative abundances with standard deviation and relative standard deviation (CV), and calculations of monosaccharide average compositions for each technical replicate.
	Table S2-10.
		N-glycans present in SW620 cell line, retention times (min), peak areas, relative abundances with standard deviation and relative standard deviation (CV), and calculations of monosaccharide average compositions for each technical replicate.
	Table S2-11.
		N-glycans present in SW1116 cell line, retention times (min), peak areas, relative abundances with standard deviation and relative standard deviation (CV), and calculations of monosaccharide average compositions for each technical replicate.
	Table S2-12.
		N-glycans present in KM12 cell line, retention times (min), peak areas, relative abundances with standard deviation and relative standard deviation (CV), and calculations of monosaccharide average compositions for each technical replicate.
	Table S2-13.
		N-glycans present in SW948 cell line, retention times (min), peak areas, relative abundances with standard deviation and relative standard deviation (CV), and calculations of monosaccharide average compositions for each technical replicate.
	Table S2-14.
		N-glycans present in LOVO cell line, retention times (min), peak areas, relative abundances with standard deviation and relative standard deviation (CV), and calculations of monosaccharide average compositions for each technical replicate.
	Table S2-15.
		N-glycans present in LS174T cell line, retention times (min), peak areas, relative abundances with standard deviation and relative standard deviation (CV), and calculations of monosaccharide average compositions for each technical replicate.
	Table S2-16.
		N-glycans present in SW1463 cell line, retention times (min), peak areas, relative abundances with standard deviation and relative standard deviation (CV), and calculations of monosaccharide average compositions for each technical replicate.
	Table S2-17.
		N-glycans present in LS180 cell line, retention times (min), peak areas, relative abundances with standard deviation and relative standard deviation (CV), and calculations of monosaccharide average compositions for each technical replicate.
	Table S2-18.
		N-glycans present in CCL218 cell line, retention times (min), peak areas, relative abundances with standard deviation and relative standard deviation (CV), and calculations of monosaccharide average compositions for each technical replicate.
	Table S2-19.
		N-glycans present in T84 cell line, retention times (min), peak areas, relative abundances with standard deviation and relative standard deviation (CV), and calculations of monosaccharide average compositions for each technical replicate.
	Table S2-20.
		N-glycans present in Colo320 cell line, retention times (min), peak areas, relative abundances with standard deviation and relative standard deviation (CV), and calculations of monosaccharide average compositions for each technical replicate.
	Table S2-21.
		N-glycans present in LS411N cell line, retention times (min), peak areas, relative abundances with standard deviation and relative standard deviation (CV), and calculations of monosaccharide average compositions for each technical replicate.
	Table S2-22.
		N-glycans present in SW1398 cell line, retention times (min), peak areas, relative abundances with standard deviation and relative standard deviation (CV), and calculations of monosaccharide average compositions for each technical replicate.
	Table S2-23.
		N-glycans present in C10 cell line, retention times (min), peak areas, relative abundances with standard deviation and relative standard deviation (CV), and calculations of monosaccharide average compositions for each technical replicate.
	Table S2-24.
		N-glycans present in HT29 cell line, retention times (min), peak areas, relative abundances with standard deviation and relative standard deviation (CV), and calculations of monosaccharide average compositions for each technical replicate.
	Table S2-25.
		N-glycans present in HCT8 cell line, retention times (min), peak areas, relative abundances with standard deviation and relative standard deviation (CV), and calculations of monosaccharide average compositions for each technical replicate.
Table S3.
	The average relative quantification of glycosylation features in CRC classifications (Figure 2).
Table S4.
	Relative quantification of N-glycosylation features in CRC cell lines measured by PGC-nano-LC-ESI-MS and MALDI-TOF-MS (Figure 3).
Table S5.
	The correlation of glycosylation features and corresponding GTs in CRC and AML cell lines (Figure 4).
Table S6.
	The correlation of TFs with glycosylation features and corresponding GTs in CRC cell lines (Figure 5).

## Sheet: T.S1
Table S1. Relative abundances (%) of N-glycans in each sample. Each N-glycan isomer is labeled by its monosaccharide composition, with a letter indicating different isomers a-d. H = hexose; N = N-acetylhexosamine; F = deoxyhexose; S = N-acetylneuraminic acid; P = Phosphate; Su = Sulfate
Number	Composition		Theoretical		Retention time	Paucimannose (Man1-4GlcNAc2Fuc0-1)	Oligomannose(M5-M9)	Complex	Hybrid	Bisection	Monoantennary	Biantennary	Triantennary	Tetraantennary	Galactosylation	Fucosylation	Core fucosylation	Antenna fucosylation	Sialylation	α2-3 sialylation	α2-6 sialylation	Sulfation	Phosphorylation	LacdiNAc	Fucosylated LacdiNAc (LDNF)	LacNAc repeat	Antigens	Caco2	Co115	Colo205	DLD-1	HCT15	HCT116	RKO	SW48	SW480	SW620	SW1116	KM12	SW948	LOVO	LS174T	SW1463	LS180	WiDr	T84	Colo320	LS411N	SW1398
			[M-H]-	[M-H]2-
1	H2N2		749.28		42.3	X																													0.751458
2	H2N2F1		895.34		50	X										X	X											3.94524	0.790365	0.707738		0.867614		2.71603	3.66829	1.18075	1.59668	0.834457	0.541907	1.55557	1.02038	2.05112	1.03383	3.28078	0.541677	2.17277	1.66596	1.57682	0.83423
3	H3N2		911.34		47.9	X																						0.6078	0.285471	1.34612	1.39443	0.593633	0.78472		1.42047	1.61325	1.15779	0.700334	0.488221	0.639393	0.593663	0.712126	0.289245	0.975971		0.616999	0.550575	0.540617	1.28873
4	H3N2F1		1057.39		56.5	X										X	X											2.39563	1.30772	2.82325		2.51447		3.0695	8.12962	4.79913	3.86545	2.44149	1.98801	1.425	3.15466	3.72762	1.96567	3.01317	2.61782	2.45637	2.44757	3.33603	6.49493
5	H4N2a		1073.39		38.9	X																						0.246336							0.262146							0.23756	0.315491	0.308655		0.426317
6	H4N2b		1073.39		45.2	X																						0.222508	0.279105	0.294608	0.350553	0.33774			0.596661	0.913168	0.373314	0.71839		0.400793	0.275547	0.36512	0.157347	0.624685			0.202821	0.256467	0.265626
7	H4N2F1		1219.45		53.8	X										X	X																		0.255791	0.306872												0.177226
8	H5N2a		1235.44		36.6		X																					0.134153								0.256824		0.339348				0.162065		0.385083
9	H5N2b		1235.44		49.7		X																					2.31449	0.989026	4.05638	2.90418	1.95746	1.90785	1.17918	2.52925	3.0449	2.10192	3.7554	1.59975	3.20342	2.04815	2.82002	1.06959	2.61862	2.26393	1.75119	2.605	3.21243	1.84955
10	H5N2P1		1315.41		30.4		X																X					0.103514							0.089285	0.102119		0.0461012
11	H5N2F1		1381.5		59		X									X	X																					0.112563
12	H6N2a		1397.49	698.245	41.5		X																					9.15215	13.6929	13.6155	8.97793	15.6033	8.20464	9.76944	9.09966	12.2189	11.8501	12.38	13.9395	11.956	14.4327	13.5603	12.6469	12.876	16.6173	14.924	8.4869	11.2618	12.3094
13	H6N2b		1397.49	698.245	43.5		X																					0.742245	0.919415		0.652011					0.704736		0.98362					1.18761			1.22824		1.92001	0.740631
14	H6N2P1a		1477.46	738.23	34.9		X																X					2.40681		1.15303	0.94207	0.900617	0.775843	1.42697	1.60931	1.4712	0.994616	0.525712	0.506418	1.3792		0.206815		0.688204	0.740745	0.678429	0.837795	1.42071	0.468187
15	H6N2P1b		1477.46	738.23	38		X																X					1.39232		0.992659	1.8392	0.675003	1.07208	1.30305	0.46097	1.50312	0.825473		0.784186	1.03638		0.200252		0.208459	1.12725		0.744837	0.688498	1.14389
16	H7N2a		1559.54	779.27	39.5		X																					7.69542	13.3454	5.39845	5.54871	9.89034	5.5428	9.71885	7.93804	8.38513	8.05506	11.5208	7.51623	7.72657	11.4218	10.8572	14.6519	10.2804	10.0543	12.8069	6.18111	8.04989	10.2641
17	H7N2b		1559.54	779.27	41.3		X																					3.38854	4.17865	2.57717	3.13517	3.44165	1.80672	3.69622	3.44526	3.423	3.22902	5.13754	3.37699	2.55564	5.05057	4.15807	4.00051	4.76777	3.58333	5.04508	3.24255	3.5851	2.98695
18	H6N2F1P1		1623.52	811.26	45.1		X									X	X						X					0.663596				0.582576		1.05168	0.270306	0.512858	0.829282		0.637553						0.572077		0.929062		0.4748
19	H7N2P1		1639.5	819.25	34.7		X																X					2.76414		2.50403	2.6404	2.88998	2.53189	3.05572	1.98311	3.44439	3.35473	2.23554	1.66668	2.32582	1.08583	0.655678		1.63541	2.82532	1.99763	1.98705	3.22334	2.32989
20	H7N2P2		1719.48	859.24	29.3		X																X*2					1.97406		1.30252	1.84396	0.974381	2.20051	2.18067	0.894014	2.0271	2.03322	0.712639	1.64214			0.464297		0.670983	1.9891	0.73567	1.03224	1.54726	2.08477
21	H8N2		1721.6	860.3	39.7		X																					27.8397	21.6615	25.0323	21.2491	28.1498	19.9628	25.9975	22.676	19.2016	23.7945	24.4666	21.99	26.1392	24.9801	23.2279	22.4835	20.0102	28.6515	20.3081	24.409	20.9827	22.1044
22	H8N2P1		1801.57	900.285	35.9		X																X							0.371125	0.47748	0.719594	0.25589	0.952987	0.352719	0.538247	0.601194		0.457863	0.527397	0.324769			0.213845		0.463575	0.452247	0.494306	0.544666
23	H8N2P2		1881.53	940.265	30		X																X*2							0.211642								0.111877
24	H9N2		1883.64	941.32	40.2		X																					13.4189	14.4078	16.8263	19.0479	20.9461	18.0745	24.3005	22.4971	17.0882	22.1178	17.5672	23.2937	23.0466	21.6873	16.87	12.5648	15.242	16.5575	18.6121	18.8603	15.5968	15.5057
25	H9N2P1		1963.62	981.31	35.9		X																X									0.307832						0.0817771					0.216401
26	H10N2		2045.7	1022.35	42.6		X																					1.49134	1.17868	1.9747	1.78567	2.00333	0.60919	2.93614	2.46807	1.79846	1.3791	1.5426	2.51238	2.36169	1.24259	2.21388	0.727617	1.74013	1.23629	1.26707	2.69769	0.653624	1.56556
27	H10N2P1		2125.66	1062.33	34.5		X																X					0.384943	0.284499	0.23841	0.244223	0.495338	0.184779		0.334293	0.231471		0.447304	0.459847	0.463109	0.391407	0.301435	0.331523	0.185549			0.208299	0.418873	0.226526
28	H3N3		1114.42		39.6			X		X																												0.238056
29	H3N3F1		1260.47		46.7			X			X					X	X											0.182753																				0.170207
30	H4N3		1276.47		53.9			X			X				X																0.215118
31	H4N3F1		1422.53		62.2			X			X				X	X	X																		0.697412	0.426455						0.465796
32	H4N3S1a		1567.56	783.28	42.9			X			X				X				X		X								0.35428	0.428789			1.87802											0.859773				1.25263
33	H4N3S1b		1567.56	783.28	52.2			X			X				X				X	X										0.286624	0.396331		0.360012
34	H4N3S1c		1567.56	783.28	61.6			X			X				X				X											0.225891	0.46719
35	H4N3F1S1a		1713.62	856.31	49.4			X			X				X	X	X		X		X								0.504895					1.01703			1.23566	0.422452	0.76018		0.75422	2.26724	0.579935	3.52727		2.73918	1.17604	5.30065	1.10882
36	H4N3F1S1b		1713.62	856.31	58.5			X			X				X	X	X		X		X														0.712796								0.303243	0.202833				0.30054
37	H4N3F1S1c		1713.62	856.31	64			X			X				X	X	X		X	X															0.562728
38	H4N3F1S1d		1713.62	856.31	67.2			X			X				X	X	X		X	X										0.29877		0.42861			0.484137								0.332541
39	H3N4F1S1		1754.65	876.825	48.3			X			X				X	X	X		X					X																				0.24078
40	H5N4F1c		1787.66	893.33	61.5			X			X				X*2	X	X									X									0.354687							0.250336							0.413664
41	H4N3F2S1b		1859.68	929.34	60.5			X			X				X	X*2	X	X	X								Sialyl Lewis A/X															0.298868
42	H3N4F1b		1463.56	731.28	48.9			X				X				X	X											0.573581		0.431903		0.589777			0.377591	0.359159		0.156602	0.681767		0.658175	1.15715		0.458694			0.681764	0.32937	0.288406
43	H3N5		1520.56	759.78	31.8			X		X		X																0.19169
44	H4N4F1a		1625.6	812.3	39.1			X				X			X	X	X											0.229728		0.393945						0.274301					0.523169			0.183213
45	H4N4F1b		1625.6	812.3	50.5			X				X			X	X	X											0.389202							0.248498	0.911795	0.772229				0.304089	0.274953
46	H5N4b		1641.6	820.3	36.2			X				X			X*2													0.830744		0.527972						0.856695	0.859122	1.68657		1.1171
47	H5N4c		1641.6	820.3	47.9			X				X			X*2															0.302972	2.74659		1.60847		0.356238	0.296833			0.275995		0.347906	0.270602							0.978072
48	H3N5F1		1666.63	832.815	47.5			X					X			X	X																		0.614253						0.328448	0.476126		0.216853				0.495348
49	H4N5		1682.62	840.81	35.9			X		X		X			X													0.626165		0.458909						0.441498		0.693153			0.275396
50	H4N4S1		1770.64	884.82	44.2			X				X			X				X		X												0.652462														0.326749
51	H5N4F1b		1787.66	893.33	53			X				X			X*2	X	X											0.303743	0.174039						0.918087	0.55497			0.548571		0.665683	0.588766	0.251469	0.196197			0.301226		0.631882
52	H5N4Su2		1801.51	900.255	51.2			X				X			X*2							X*2									0.246608
53	H4N5F1		1828.68	913.84	33.8			X		X		X			X	X		X									Lewis A/X											0.252158
54	H5N5		1844.68	921.84	38.4			X		X		X			X*2													0.992183								0.372747		0.458161
55	H4N4F1S1		1916.7	957.85	50.2			X				X			X	X	X		X		X																		0.291853			0.491232					0.687827
56	H5N4S1a		1932.68	965.84	46.6			X				X			X*2				X		X							0.345602	1.84276	1.37229	1.72883		14.3715	0.824854		0.438273	0.655998	0.303981	1.74551	0.542258	0.713866	1.09685	1.27511	1.20794	1.4083	1.20206	1.9465	0.935876	1.82295
57	H5N4S1b		1932.68	965.84	56.2			X				X			X*2				X	X									0.673566	0.334712	2.58717		2.36943						0.317263				0.639288				0.408857
58	H5N4F2		1933.72	966.36	51.1			X				X			X*2	X*2	X	X									Lewis A/X															0.449718				0.36075			0.45933
59	H4N5S1a		1973.72	986.36	45.5			X				X			X				X					X									0.742442
60	H4N5S1b		1973.72	986.36	48.3			X				X			X				X					X									0.40522
61	H5N5F1a		1990.74	994.87	43.4			X		X		X			X*2	X	X											1.91391								0.806779	0.764069			0.527547
62	H5N5F1b		1990.74	994.87	46.2			X		X		X			X*2	X		X									H antigen	0.699227		0.210006								0.127509
63	H6N5a		2006.73	1002.87	49.2			X					X		X*3																		0.296338
64	H6N5b		2006.73	1002.87	54.1			X					X		X*3																0.771647																		0.303675
65	H6N5c		2006.73	1002.87	59.1			X				X			X*3											X					0.250905																		0.202542
66	H5N4S1Su1		2012.65	1005.83	56.8			X				X			X*2				X			X									0.886239
67	H5N4F1S1a		2078.74	1038.87	44.9			X				X			X*2	X		X	X		X						Lewis A/X			0.50617									0.294599		0.347118	0.910151		1.35065	0.506536	1.11915			0.561552
68	H5N4F1S1b		2078.74	1038.87	52.2			X				X			X*2	X	X		X		X							0.227753	3.71461	0.676453				1.61784		0.359797	0.717814	0.399389	2.98083		1.07908	1.33999	2.90607	1.5545	1.01318	2.51861	4.47789	1.63021	1.33747
69	H5N4F1S1c		2078.74	1038.87	60			X				X			X*2	X	X		X										1.22743										0.470483				1.38567				0.681282
70	H5N4F3		2079.77	1039.38	62.6			X				X			X*2	X*3	X	X*2									Lewis A/X H antigen
71	H4N5F1S1		2119.78	1059.39	37.5			X		X		X			X	X		X	X								Sialyl Lewis A/X											0.217245
72	H5N5S1a		2135.78	1067.39	39			X		X		X			X*2				X																	0.153449		0.289554
73	H5N5S1b		2135.78	1067.39	44			X		X		X			X*2				X											0.633323
74	H5N5F2		2136.8	1067.9	49.5			X		X		X			X*2	X*2	X	X									Lewis A/X	0.592609
75	H6N5F1a		2152.8	1075.9	55.8			X					X		X*3	X	X																		0.317304														0.212489
76	H6N5F1b		2152.8	1075.9	60.1			X					X		X*3	X	X																		0.196063						0.350483	0.148879							0.289177
77	H6N5F1c		2152.79	1075.89	65.3			X				X			X*3	X	X									X									0.177023
78	H5N4F1S1Su1a		2158.71	1078.86	54.2			X				X			X*2	X	X		X			X																										0.326616
79	H5N4F1S1Su1b		2158.71	1078.86	55.1			X				X			X*2	X	X		X			X																										0.399308
80	H3N6F3		2161.83	1080.41	50			X				X				X*3	X	X*2						X*2	X*2																0.162297
81	H5N4S2a		2223.78	1111.39	46.9			X				X			X*2				X*2		X*2								0.296107			0.602381	1.05229						0.390488				0.274012			0.319252	0.635178	0.468985	0.288906
82	H5N4S2b		2223.78	1111.39	54.1			X				X			X*2				X*2	X	X							0.224153	1.23447	0.601956	0.543281	0.596131	2.58364						0.839998		0.198291	0.340069	1.10489				0.89858	0.29614
83	H5N4S2c		2223.79	1111.39	58.1			X				X			X*2				X*2	X	X								0.15304
84	H5N4S2d		2223.78	1111.39	61.5			X				X			X*2				X*2	X*2									1.11318	0.388001	3.83489		0.672806						0.291738				1.19901				0.259448
85	H5N4F2S1a		2224.8	1111.9	50.4			X				X			X*2	X*2	X	X	X								Lewis A/X			0.409646								0.644008	0.334066		0.34994	1.66163		2.09777	1.1291	2.20732		0.618854	0.861964
86	H5N4F2S1b		2224.81	1111.9	57.1			X				X			X*2	X*2	X	X	X								Lewis A/X									0.190705
87	H5N5F1S1a		2281.82	1140.41	43.4			X		X		X			X*2	X	X		X		X							0.3418
88	H6N5S1a		2297.83	1148.41	48.7			X					X		X*3				X														0.611725																0.255995
89	H6N5S1b		2297.83	1148.41	52			X				X			X*3				X							X							0.444068																0.25579
90	H6N5S1c		2297.83	1148.41	57.8			X				X			X*3				X							X					0.2264
91	H3N6F2S1		2306.86	1152.93	50.3			X				X				X*2	X	X	X					X*2	X																0.18791
92	H5N4F1S2a		2369.84	1184.42	51.6			X				X			X*2	X	X		X*2		X*2								1.59779										0.394103				0.900771				1.28863	0.980838
93	H5N4F1S2b		2369.84	1184.42	58.8			X				X			X*2	X	X		X*2	X	X								6.72652	0.311409									0.706457				5.71545		0.265605		2.40564	0.295246
94	H5N4F1S2c		2369.84	1184.42	62.2			X				X			X*2	X	X		X*2	X	X								0.485293
95	H5N4F1S2d		2369.84	1184.42	65.9			X				X			X*2	X	X		X*2	X*2									2.19282			0.192644							0.392069				3.81617				0.394805
96	H5N4F1S2e		2369.85	1184.42	71			X				X			X*2	X			X*2											0.105706
97	H5N4F5		2371.89	1185.45	56.05			X						X	X*4																																		0.42465
98	H4N5F1S2		2410.86	1204.93	57.9			X				X			X	X			X*2					X
99	H5N5S2		2426.87	1212.93	52.6			X		X		X			X*2				X*2											0.292031
100	H6N5F1S1a		2443.88	1221.44	53.4			X				X			X*3	X	X		X							X																0.146362					0.356944	0.222036
101	H6N5F1S1b		2443.88	1221.44	57.3			X				X			X*3	X	X		X							X
102	H5N4F2S2a		2515.9	1257.45	53.8			X				X			X*2	X*2	X	X	X*2								Sialyl Lewis A/X																	0.235344
103	H7N6F1		2517.92	1258.46	61.1			X						X	X*4	X	X																		0.321798						0.298374								0.490123
104	H5N5F1S2b		2572.92	1285.96	56.6			X		X		X			X*2	X	X		X*2											0.217414
105	H6N5S2a		2588.92	1293.96	55.6			X				X			X*3				X*2														0.198402
106	H6N5S2b		2588.92	1293.96	58.9			X				X			X*3				X*2												0.316726
107	H6N5F1S2a		2734.98	1366.99	60.5			X					X		X*3	X			X*2
108	H6N5F1S2b		2734.98	1366.99	62.4			X					X		X*3	X			X*2
109	H6N5F1S2c		2734.98	1366,99	65.1			X					X		X*3	X			X*2
110	H3N4F1a		1463.56	731.28	47.2			X		X	X					X	X											0.50872								0.689245	0.537063	0.247154
111	H5N3F1a		1584.58	791.79	38.9				X						X	X		X									Lewis A/X	0.222599		0.45614										0.677	0.355245	0.444955		0.439348					0.512626
112	H5N3F1b		1584.58	791.79	47.7				X						X	X	X																		0.397365	0.597295			0.354247		0.433925			0.256893
113	H6N3		1600.56	799.78	44.8				X						X													0.955182		1.25928	5.22378	0.877107	1.83783		1.04219	2.11488	0.824623	1.05715	1.04362	2.06316	1.40089	0.65325	0.167149	0.775685	1.01529	0.542215	0.329652	0.711431	1.18258
114	H5N4a		1641.6	820.3	32.6				X	X																		0.212497								0.234109	0.423901	0.469447
115	H5N4d		1641.6	820.3	55.1				X						X
116	H6N3P1		1680.53	839.765	32.2				X						X								X					0.276662
117	H6N3Su1		1680.53	839.765	37.5				X						X							X						0.651895	0.818099	0.836379	0.544529	1.28255	0.387455	0.791243		0.404717	0.497364	0.976164	0.722155	0.910761	0.572844	0.372782	0.980976	0.629567	0.873019	0.534206	0.572088	0.705024	0.451045
118	H5N3S1a		1729.6	864.3	41.6				X						X				X		X									0.937012			1.81981															1.50794
119	H5N3S1b		1729.6	864.3	51.3				X						X				X	X								0.180103	0.476119	0.815816	1.56589		0.682012						0.292808				0.604955				0.254881
120	H5N3F2		1730.64	864.82	44.2				X						X	X*2	X	X									Lewis A/X													0.842246				0.574523
121	H6N3F1a		1746.62	872.81	44.3				X						X	X		X									Lewis A/X			0.989468										1.89427		1.04433		1.05189					0.89072
122	H6N3F1b		1746.62	872.81	50.9				X						X	X		X									H antigen	0.325683				0.49312				0.666644
123	H6N3F1c		1746.62	872.81	52.6				X						X	X	X																			0.29734					0.146447
124	H5N4F1a		1787.66	893.33	42.7				X	X					X	X	X											0.727275								0.792136	1.20731			1.51669		0.310491			0.582949				0.375671
125	H6N4a		1803.65	901.325	33.9				X						X													0.487837										0.519823
126	H6N4b		1803.65	901.325	38.6				X						X													1.07408		0.423403						0.935717	0.877074	1.14027		0.667414
127	H7N3Su1		1842.54	920.77	37.6				X						X							X								0.616136	0.225226									0.587976	0.348652	0.244073
128	H5N3F1S1a		1875.66	937.33	47				X						X	X	X		X		X								0.731907					0.655534			0.669227	0.384683	0.65299		0.317032	0.288726	0.722904	1.30612		1.21893	1.04829	1.10673	0.207114
129	H5N3F1S1b		1875.66	937.33	56.5				X						X	X	X		X	X									0.373309												0.181493		0.80902				0.293556
130	H6N3S1a		1891.66	945.33	44.3				X						X				X		X							0.505512	0.716801	1.35601	0.494154		2.01275	0.762662		0.588369	1.37284	1.8373	1.12707		0.584102	0.703108	0.797287	2.07548	2.78015	1.47797	1.50117	2.37684	1.32569
131	H6N3S1b		1891.66	945.33	53.9				X						X				X	X								0.281245	0.283674	0.910431	2.17936		0.43105					0.134709	0.308362	0.409649			0.516378		0.675546		0.36598
132	H6N3F2		1892.69	945.845	48.8				X						X	X*2		X*2									Lewis B/Y									0.453556				0.469333		0.219484		0.37572
133	H6N4F1a		1949.71	974.355	34.2				X	X					X	X		X									Lewis A/X											0.145657
134	H6N4F1b		1949.71	974.355	44.3				X	X					X	X	X											0.979127							0.223505	0.636137
135	H8N3Su1		2004.64	1001.82	37.2				X						X							X						0.662945	0.517084	0.559027	0.642711	1.08683	0.259748	0.976409	0.266497	0.38097	0.426467	0.537533	0.381517	1.03285	0.405488	0.292584	0.716651	0.293539	0.372207	0.269994	0.521132	0.420096	0.384514
136	H6N3F1S1		2037.73	1018.37	50.6				X						X	X	X		X										0.216641															0.16353			0.644831
137	H7N3S1		2053.72	1026.36	50.2				X						X				X										0.25514														0.359166
138	H7N3S1P1a		2133.69	1066.35	37.3				X						X				X				X										0.408313															0.206645
139	H7N3S1P1b		2133.69	1066.35	45.4				X						X				X				X								0.873423
																												100	100	100	100	100	100	100	100	100	100	100	100	100	100	100	100	100	100	100	100	100	100
																											Paucimannose	7.41752	2.66266	5.17172	1.74498	4.31346	0.78472	5.78553	15.0844	8.81317	6.99323	4.69467	3.01814	4.02076	5.04425	7.09355	3.76159	8.20326	3.15949	5.67245	4.86693	5.88716	8.88352
																											Oligomannose	75.8663	70.6578	76.2543	71.288	89.5374	63.1295	87.5689	76.6474	75.9523	81.166	81.9666	80.3831	82.721	82.6652	75.698	69.8803	71.5226	86.2186	79.8179	72.6741	73.0553	74.5991
																											Complex	9.17356	22.2908	9.4149	15.2179	2.40954	28.2468	3.45973	6.33861	7.1327	5.54195	6.13599	11.716	2.1869	7.54444	12.6347	20.6836	12.3318	4.32272	10.4663	16.9274	14.0229	11.1875
																											Hybrid	7.54264	4.38877	9.1591	11.7491	3.73961	7.83897	3.18585	1.92956	8.10187	6.29881	7.20275	4.88278	11.0713	4.74611	4.57378	5.67448	7.94229	6.29916	4.04331	5.53158	7.0347	5.32996
																											Bisection	7.7852	0	1.81168	0	0	0	0	0.223505	4.1261	2.93234	3.13809	0	2.04424	0.275396	0.310491	0	0	0.582949	0	0	0	0.375671
																											Monoantennary	0.691473	0.859175	1.24007	1.07864	0.42861	2.23803	1.01703	2.81176	1.1157	1.77272	0.669606	0.76018	0	0.75422	3.28224	1.21572	4.83065	0	2.73918	1.17604	7.02403	1.52249
																											Biantennary	8.48209	21.4316	8.17482	13.3676	1.98093	25.1007	2.4427	2.07744	6.017	3.76923	5.22833	10.9558	2.1869	5.81292	8.72746	19.4679	7.28431	4.32272	7.72714	15.7513	6.50348	7.68887
																											Triantennary	0	0	0	0.771647	0	0.908063	0	1.12762	0	0	0	0	0	0.67893	0.625005	0	0.216853	0	0	0	0.495348	1.06134
																											Tetraantennary	0	0	0	0	0	0	0	0.321798	0	0	0	0	0	0.298374	0	0	0	0	0	0	0	0.914773
																											Galactosylation	21.5187	48.1112	25.0322	42.672	6.95053	61.845	9.08827	11.2515	17.9823	13.8768	16.1367	25.8991	15.4452	16.2517	23.0738	45.826	26.241	14.9446	22.2368	36.1891	26.4588	29.3685
																											Fucosylation	15.8148	20.0433	8.94767	0	5.66882	0	10.1276	18.9273	15.4602	12.1948	7.02938	12.3637	10.2192	12.4806	21.6436	20.7228	24.0094	8.35804	17.3612	19.4813	17.8849	17.7663
																											Core fucosylation	13.9747	20.0433	6.27053	0	5.1757	0	10.1276	18.9273	13.6957	12.1948	5.6428	11.7351	5.86706	10.9158	16.395	20.7228	17.5085	6.7224	13.6739	19.4813	17.266	14.4801
																											Antenna fucosylation	1.84012	0	2.57143	0	0.49312	0	0	0	1.76446	0	1.38658	0.628665	4.35218	1.56481	5.24862	0	6.50096	1.63564	3.68722	0	0.618854	3.28619
																											Sialylation	2.33032	38.9696	13.025	20.7948	3.21092	36.2031	4.87792	1.75966	1.73059	4.65154	4.63332	15.6057	0.951906	4.91134	9.88429	37.2522	15.0573	8.04402	13.1217	25.9353	20.2673	8.31516
																											α2-3 sialylation	0.685501	17.018	4.33572	14.9418	1.41003	7.77176	0	1.04687	0	0	0.134709	3.8325	0.409649	0.379784	0.340069	19.7529	0	0.941151	0	5.936	0.591386	0
																											α2-6 sialylation	1.64482	20.2524	6.1901	2.76626	1.80089	25.4227	4.87792	0.712796	1.38644	4.65154	3.34781	10.9687	0.542258	3.99371	7.43735	15.7545	12.0846	5.97376	10.9144	18.3163	17.9024	6.94141
																											Sulfation	1.31484	1.33518	2.01154	2.79192	2.36938	0.647204	1.76765	0.266497	0.785688	0.923831	1.5137	1.10367	2.53159	1.32698	0.909439	1.69763	0.923105	1.24523	0.8042	1.09322	1.85104	0.835558
																											Phosphorylation	11.9401	0.284499	8.28759	10.7047	8.51971	9.62983	12.1518	6.88802	11.8576	10.6717	4.98546	7.79682	5.7319	1.802	2.29278	0.547924	4.27344	9.2436	4.61097	7.22377	9.54688	9.35749
																											LacdiNAc	0	0	0	0	0	1.14766	0	0	0	0	0	0	0	0.700415	0	0	0.24078	0	0	0	0	0
																											Fucosylated LacdiNAc	0	0	0	0	0	0	0	0	0	0	0	0	0	0.512505	0	0	0	0	0	0	0	0
																											LacNAc repeat	0	0	0	0.477305	0	0.444068	0	0.53171	0	0	0	0	0	0	0.396698	0	0	0	0	0.356944	0.222036	0.871997
																											Sialyl Lewis A/X	0	0	0	0	0	0	0	0	0	0	0.217245	0	0	0	0.298868	0	0.235344	0	0	0	0	0
																											Lewis A/X	0.815208	0	2.36142	0	0	0	0	0	0.190705	0	1.04182	0.628665	3.41351	1.0523	4.51078	0	5.51417	1.63564	3.68722	0	0.618854	3.28619
																											Lewis B/Y	0	0	0	0	0	0	0	0	0.453556	0	0	0	0.469333	0	0.219484	0	0.37572	0	0	0	0	0
																											H antigen	1.02491	0	0.210006	0	0.49312	0	0	0	0.666644	0	0.127509	0	0	0	0	0	0	0	0	0	0	0
[truncated: 3 more columns]

## Sheet: T.S2-1 Caco2 
Table S2-1. N-glycans present in the Caco2 cell line, retention times (min), peak areas, relative abundances with standard deviation and relative standard deviation (CV), and calculations of monosaccharide average compositions for each technical replicate. H = hexose; N = N-acetylhexosamine; F = deoxyhexose; S = N-acetylneuraminic acid; Su = Sulfate; P = Phosphate.
		162.053	203.079	146.058	291.095	79.9568	79.9663	-1.00727
Composition		H	N	F	S	Su	P	H+	Reduced Reducing end mass	Theoretical		Technical replicate 1													Technical replicate 2													Average
										[M-H]1-	[M-H]2-	[M-H]1- obv.	[M-2H]2- obv.	RT (min)	Peak area	Rel. peak area (%)		S/N	H	N	F	S	Su	P	[M-H]1- obv.	[M-2H]2- obv.	RT (min)	Peak area	Rel. peak area (%)		S/N	H	N	F	S	Su	P	[M-H]1- obv	RT avg (min)	Peak area	Rel. peak area (%)	m/z error	ppm error	SD (%)	CV (%)
	H7N2P2	7	2				2		20.0262	1719.48	859.24	1719.46	859.23	29.6	1145068160	1.37993	EIC (859.23; 859.72; 860.24)±0.3 -All MS	34.2	9.65951	2.75986	0	0	0	2.75986	1719.44	859.22	29.4	1633679104	2.5682	EIC (859.23; 859.72; 860.24)±0.3 -All MS	67.7	17.9774	5.1364	0	0	0	5.1364	1719.45	29.5	1389373632	1.97406	0.02993	17.4064	0.840232	0.425636
	H5N2P1	5	2				1		20.0262	1315.41	657.204	1315.34		29.9	60485688	0.0728917	EIC (1315.34; 1316.34; 1317.33)±0.3 -All MS	6.4	0.364459	0.145783	0	0	0	0.0728917	1315.37		30.6	85326800	0.134137	EIC (1315.34; 1316.34; 1317.33)±0.3 -All MS	10.8	0.670683	0.268273	0	0	0	0.134137	1315.36	30.25	72906244	0.103514	0.05303	40.3145	0.0433066	0.418364
	H6N3Su1a	6	3			1			20.0262	1680.53	839.765	1680.52	839.76	31.9	185385424	0.223409	EIC (839.77; 840.27; 840.79)±0.3 -All MS	9.3	1.34046	0.670228	0	0	0.223409	0	1680.52	839.76	32.2	209864752	0.329914	EIC (839.77; 840.27; 840.79)±0.3 -All MS	10.8	1.97949	0.989743	0	0	0.329914	0	1680.52	32.05	197625088	0.276662	0.01073	6.38489	0.0753105	0.272211
	H3N5	3	5						20.0262	1520.57	759.787	1520.54	759.77	32	152739040	0.184067	EIC (759.82; 760.34; 760.82)±0.3 -All MS	8.2	0.552201	0.920334	0	0	0	0	1520.56	759.78	33.2	126787208	0.199314	EIC (759.82; 760.34; 760.82)±0.3 -All MS	7	0.597941	0.996568	0	0	0	0	1520.55	32.6	139763124	0.19169	0.02433	16.0005	0.0107811	0.0562425
	H5N4a	5	4						20.0262	1641.6	820.3	1641.6	820.3	32.7	183142144	0.220706	EIC (820.30; 820.80; 821.33)±0.3 -All MS	9.3	1.10353	0.882823	0	0	0	0	1641.54	820.27	33.9	129951672	0.204288	EIC (820.30; 820.80; 821.33)±0.3 -All MS	8.5	1.02144	0.817153	0	0	0	0	1641.57	33.3	156546908	0.212497	0.03053	18.5977	0.0116089	0.0546311
	H6N4a	6	4						20.0262	1803.65	901.327	1803.6	901.3	34.2	306168256	0.368965	EIC (901.31; 901.81; 902.29)±0.3 -All MS	17.9	2.21379	1.47586	0	0	0	0	1803.6	901.3	35.8	385939104	0.606709	EIC (901.31; 901.81; 902.29)±0.3 -All MS	17.1	3.64025	2.42684	0	0	0	0	1803.6	35	346053680	0.487837	0.05333	29.5678	0.16811	0.344603
	H10N2P1	10	2				1		20.0262	2125.67	1062.34	2125.62	1062.31	34.5	412078400	0.496598	EIC (1062.38; 1062.87; 1063.30)±0.3 -All MS	34.2	4.96598	0.993197	0	0	0	0.496598	2125.58	1062.29	35.1	173842784	0.273287	EIC (1062.38; 1062.87; 1063.30)±0.3 -All MS	14.8	2.73287	0.546573	0	0	0	0.273287	2125.6	34.8	292960592	0.384943	0.07203	33.8858	0.157905	0.410205
	H7N2P1	7	2				1		20.0262	1639.51	819.257	1639.46	819.23	35.1	2455432448	2.95906	EIC (819.24; 819.73; 820.24)±0.3 -All MS	119.9	20.7134	5.91812	0	0	0	2.95906	1639.48	819.24	35.5	1634327808	2.56922	EIC (819.24; 819.73; 820.24)±0.3 -All MS	76.1	17.9845	5.13843	0	0	0	2.56922	1639.47	35.3	2044880128	2.76414	0.04363	26.6116	0.275659	0.099727
	H6N2P1a	6	2				1		20.0262	1477.46	738.23	1477.42	738.21	35.2	1907731968	2.29902	EIC (738.21; 738.73; 739.21; 1477.43; 1478.44; 1479.38)±0.3 -All MS	91.1	13.7941	4.59804	0	0	0	2.29902	1477.42	738.21	35.6	1599587328	2.5146	EIC (738.21; 738.73; 739.21; 1477.43; 1478.44; 1479.38)±0.3 -All MS	79.9	15.0876	5.02921	0	0	0	2.5146	1477.42	35.4	1753659648	2.40681	0.04083	27.6353	0.15244	0.0633371
	H4N5	4	5						20.0262	1682.63	840.814	1682.66	840.83	35.4	616154944	0.742533	EIC (840.84; 841.30; 841.84)±0.3 -All MS	26.7	2.97013	3.71266	0	0	0	0	1682.6	840.8	36.6	324291648	0.509797	EIC (840.84; 841.30; 841.84)±0.3 -All MS	23.4	2.03919	2.54899	0	0	0	0	1682.63	36	470223296	0.626165	-0.00287	-1.70567	0.164569	0.26282
	H5N4b	5	4						20.0262	1641.6	820.3	1641.6	820.3	36.6	590681536	0.711834	EIC (820.30; 820.80; 821.33)±0.3 -All MS	34.7	3.55917	2.84734	0	0	0	0	1641.58	820.29	37.6	604093312	0.949655	EIC (820.30; 820.80; 821.33)±0.3 -All MS	30.4	4.74827	3.79862	0	0	0	0	1641.59	37.1	597387424	0.830744	0.01053	6.41447	0.168164	0.202426
	H6N3Su1b	6	3			1			20.0262	1680.53	839.765	1680.52	839.76	36.9	561428096	0.676581	EIC (839.77; 840.27; 840.79)±0.3 -All MS	33.6	4.05948	2.02974	0	0	0.676581	0	1680.52	839.76	37.6	398979552	0.627209	EIC (839.77; 840.27; 840.79)±0.3 -All MS	25.6	3.76325	1.88163	0	0	0.627209	0	1680.52	37.25	480203824	0.651895	0.01073	6.38489	0.0349111	0.0535533
	H5N2a	5	2						20.0262	1235.44		1235.43		36.8	120151664	0.144796	EIC (1235.42; 1236.43; 1237.41)±0.3 -All MS	12.8	0.723978	0.289591	0	0	0	0	1235.42		37.8	78567280	0.12351	EIC (1235.42; 1236.43; 1237.41)±0.3 -All MS	10.8	0.617552	0.247021	0	0	0	0	1235.43	37.3	99359472	0.134153	0.01673	13.5417	0.0150509	0.112192
	H5N5	5	5						20.0262	1844.68	921.84	1844.66	921.83	37.4	861095168	1.03771	EIC (921.83; 922.33; 922.85)±0.3 -All MS	43.4	5.18856	5.18856	0	0	0	0	1844.64	921.82	38.5	602185280	0.946655	EIC (921.83; 922.33; 922.85)±0.3 -All MS	31.6	4.73328	4.73328	0	0	0	0	1844.65	37.95	731640224	0.992183	0.02993	16.225	0.0643867	0.0648939
	H8N3Su1	8	3			1			20.0262	2004.64	1001.82	2004.58	1001.79	37.4	694313920	0.836722	EIC (1001.79; 1002.30; 1002.80)±0.3 -All MS	48.8	6.69378	2.51017	0	0	0.836722	0	2004.58	1001.79	38.1	311169184	0.489168	EIC (1001.79; 1002.30; 1002.80)±0.3 -All MS	23.9	3.91335	1.4675	0	0	0.489168	0	2004.58	37.75	502741552	0.662945	0.05633	28.0999	0.245758	0.370706
	H6N2P1b	6	2				1		20.0262	1477.46	738.23	1477.44	738.22	38.1	1073118272	1.29322	EIC (738.21; 738.73; 739.21; 1477.43; 1478.44; 1479.38)±0.3 -All MS	48.7	7.75933	2.58644	0	0	0	1.29322	1477.42	738.21	38.5	948723584	1.49142	EIC (738.21; 738.73; 739.21; 1477.43; 1478.44; 1479.38)±0.3 -All MS	41.8	8.94855	2.98285	0	0	0	1.49142	1477.43	38.3	1010920928	1.39232	0.03083	20.8669	0.14015	0.100659
	H4N2a	4	2						20.0262	1073.39		1073.41		37.6	227266800	0.273881	EIC (1073.46; 1074.46; 1075.46)±0.3 -All MS	24.6	1.09552	0.547762	0	0	0	0	1073.39		38.7	139177104	0.218791	EIC (1073.46; 1074.46; 1075.46)±0.3 -All MS	14.7	0.875164	0.437582	0	0	0	0	1073.4	38.15	183221952	0.246336	-0.01107	-10.3131	0.0389543	0.158135
	H6N4b	6	4						20.0262	1803.65	901.327	1803.62	901.31	39.1	932610304	1.1239	EIC (901.31; 901.81; 902.29)±0.3 -All MS	41.7	6.74337	4.49558	0	0	0	0	1803.6	901.3	40.2	651549440	1.02426	EIC (901.31; 901.81; 902.29)±0.3 -All MS	34.4	6.14554	4.09703	0	0	0	0	1803.61	39.65	792079872	1.07408	0.04333	24.0235	0.0704546	0.0655955
	H4N4F1a	4	4	1					20.0262	1625.61	812.303	1625.6	812.3	39.2	167790704	0.202206	EIC (812.36; 812.87; 813.34)±0.3 -All MS	11.8	0.808823	0.808823	0.202206	0	0	0	1625.58	812.29	40.2	163642304	0.257251	EIC (812.36; 812.87; 813.34)±0.3 -All MS	8.6	1.029	1.029	0.257251	0	0	0	1625.59	39.7	165716504	0.229728	0.01563	9.61488	0.038923	0.16943
	H7N2a	7	2						20.0262	1559.55	779.274	1559.56	779.28	39.8	5743910400	6.92203	EIC (779.33; 779.84; 780.33)±0.3 -All MS	253.3	48.4542	13.8441	0	0	0	0	1559.54	779.27	41	5387167232	8.4688	EIC (779.33; 779.84; 780.33)±0.3 -All MS	237.5	59.2816	16.9376	0	0	0	0	1559.55	40.4	5565538816	7.69542	-0.00267	-1.71204	1.09374	0.142129
	H8N2	8	2						20.0262	1721.6	860.3	1721.58	860.29	39.9	22675642368	27.3266	EIC (860.36; 860.87; 861.34)±0.3 -All MS	935.4	218.613	54.6531	0	0	0	0	1721.56	860.28	41	18035757056	28.3528	EIC (860.36; 860.87; 861.34)±0.3 -All MS	695.2	226.822	56.7056	0	0	0	0	1721.57	40.45	20355699712	27.8397	0.03013	17.5012	0.725657	0.0260656
	H9N2	9	2						20.0262	1883.65	941.326	1883.62	941.31	40.7	11386702848	13.7222	EIC (941.31; 941.82; 942.31)±0.3 -All MS	451.2	123.5	27.4444	0	0	0	0	1883.62	941.31	41.4	8343050752	13.1156	EIC (941.31; 941.82; 942.31)±0.3 -All MS	395.8	118.04	26.2311	0	0	0	0	1883.62	41.05	9864876800	13.4189	0.03293	17.482	0.428961	0.031967
	H7N2b	7	2						20.0262	1559.55	779.274	1559.54	779.27	41.6	2598849792	3.13189	EIC (779.33; 779.84; 780.33)±0.3 -All MS	116	21.9232	6.26378	0	0	0	0	1559.52	779.26	42.6	2318778368	3.6452	EIC (779.33; 779.84; 780.33)±0.3 -All MS	94	25.5164	7.29039	0	0	0	0	1559.53	42.1	2458814080	3.38854	0.01733	11.1122	0.362961	0.107114
	H6N2a	6	2						20.0262	1397.49	698.247	1397.48	698.24	41.9	7694288896	9.27244	EIC (698.28; 698.77; 699.27; 1397.56; 1398.53; 1399.52)±0.3 -All MS	204.9	55.6346	18.5449	0	0	0	0	1397.46	698.23	43	5745333760	9.03185	EIC (698.28; 698.77; 699.27; 1397.56; 1398.53; 1399.52)±0.3 -All MS	152.7	54.1911	18.0637	0	0	0	0	1397.47	42.45	6719811328	9.15215	0.02453	17.5528	0.17012	0.018588
	H10N2	10	2						20.0262	2045.71	1022.35	2045.68	1022.34	42.4	1474836096	1.77734	EIC (1022.33; 1022.81; 1023.35)±0.3 -All MS	98.9	17.7734	3.55467	0	0	0	0	2045.66	1022.33	43.4	766742400	1.20534	EIC (1022.33; 1022.81; 1023.35)±0.3 -All MS	55.3	12.0534	2.41069	0	0	0	0	2045.67	42.9	1120789248	1.49134	0.03573	17.4659	0.404458	0.271205
	H5N4F1a	5	4	1					20.0262	1787.66	893.329	1787.64	893.32	42.7	667308160	0.804178	EIC (893.39; 893.91; 894.39)±0.3 -All MS	30.1	4.02089	3.21671	0.804178	0	0	0	1787.64	893.32	43.7	413713664	0.650372	EIC (893.39; 893.91; 894.39)±0.3 -All MS	20.6	3.25186	2.60149	0.650372	0	0	0	1787.64	43.2	540510912	0.727275	0.01843	10.3096	0.108757	0.149541
	H5N5F1S1	5	5	1	1				20.0262	2281.83	1140.42	2281.82	1140.41	43.7	378093696	0.455643	EIC (1140.41; 1140.91; 1141.45)±0.3 -All MS	28	2.27822	2.27822	0.455643	0.455643	0	0	2281.76	1140.38	44.2	145007008	0.227956	EIC (1140.41; 1140.91; 1141.45)±0.3 -All MS	21	1.13978	1.13978	0.227956	0.227956	0	0	2281.79	43.95	261550352	0.3418	0.04323	18.9453	0.160999	0.471034
	H6N2b	6	2						20.0262	1397.49	698.247	1397.52	698.26	43.8	683028416	0.823122	EIC (698.28; 698.77; 699.27; 1397.56; 1398.53; 1399.52)±0.3 -All MS	15.3	4.93873	1.64624	0	0	0	0	1397.5	698.25	44.6	420708480	0.661368	EIC (698.28; 698.77; 699.27; 1397.56; 1398.53; 1399.52)±0.3 -All MS	10.4	3.96821	1.32274	0	0	0	0	1397.51	44.2	551868448	0.742245	-0.01547	-11.0698	0.114378	0.154097
	H5N5F1a	5	5	1					20.0262	1990.74	994.869	1990.7	994.85	43.7	1742804864	2.10027	EIC (994.86; 995.34; 995.86)±0.3 -All MS	98.8	10.5013	10.5013	2.10027	0	0	0	1990.68	994.84	44.8	1098927232	1.72755	EIC (994.86; 995.34; 995.86)±0.3 -All MS	76.9	8.63775	8.63775	1.72755	0	0	0	1990.69	44.25	1420866048	1.91391	0.04783	24.0263	0.26355	0.137703
	H6N3S1a	6	3		1				20.0262	1891.67	945.335	1		44.5	468520000	0.564617	EIC (945.38; 945.88; 946.34)±0.3 -All MS	23.6	3.3877	1.69385	0	0.564617	0	0	1891.62	945.31	45.1	283968224	0.446407	EIC (945.38; 945.88; 946.34)±0.3 -All MS	19.9	2.67844	1.33922	0	0.446407	0	0	946.31	44.8	376244112	0.505512	945.359	499749	0.0835865	0.16535
	H6N4F1b	6	4	1					20.0262	1949.71	974.356	1949.68	974.34	44.5	822140992	0.990768	EIC (974.34; 974.84; 975.37)±0.3 -All MS	37.7	5.94461	3.96307	0.990768	0	0	0	1949.64	974.32	45.4	615435904	0.967486	EIC (974.34; 974.84; 975.37)±0.3 -All MS	24.2	5.80491	3.86994	0.967486	0	0	0	1949.66	44.95	718788448	0.979127	0.05123	26.2757	0.016463	0.0168139
	H6N2F1P1	6	2	1			1		20.0262	1623.52	811.259	1623.48	811.24	45.2	613204544	0.738977	EIC (811.24; 811.73; 812.25)±0.3 -All MS	31.1	4.43386	1.47795	0.738977	0	0	0.738977	1623.5	811.25	45.6	374175008	0.588215	EIC (811.24; 811.73; 812.25)±0.3 -All MS	26.5	3.52929	1.17643	0.588215	0	0	0.588215	1623.49	45.4	493689776	0.663596	0.02873	17.6961	0.106604	0.160647
	H6N3	6	3						20.0262	1600.57	799.787	1600.54	799.77	44.9	769183744	0.926949	EIC (799.77; 800.29; 800.77)±0.3 -All MS	39.2	5.56169	2.78085	0	0	0	0	1600.56	799.78	45.9	625569152	0.983415	EIC (799.77; 800.29; 800.77)±0.3 -All MS	29.6	5.90049	2.95025	0	0	0	0	1600.55	45.4	697376448	0.955182	0.02393	14.9509	0.0399281	0.0418015
	H4N2b	4	2						20.0262	1073.39		2147.74	1073.37	45.2	191577872	0.230872	EIC (1073.46; 1074.46; 1075.46)±0.3 -All MS	20.9	0.923487	0.461744	0	0	0	0	1073.36		46.3	136220784	0.214144	EIC (1073.46; 1074.46; 1075.46)±0.3 -All MS	14.8	0.856574	0.428287	0	0	0	0	1610.55	45.75	163899328	0.222508	-537.161	-500435	0.0118286	0.0531606
	H5N4S1a	5	4		1				20.0262	1932.7	965.848	1932.64	965.82	46.4	317936992	0.383148	EIC (965.90; 966.39; 966.93)±0.3 -All MS	21.7	1.91574	1.53259	0	0.383148	0	0	1932.66	965.83	47.1	195960368	0.308056	EIC (965.90; 966.39; 966.93)±0.3 -All MS	14.1	1.54028	1.23222	0	0.308056	0	0	1932.65	46.75	256948680	0.345602	0.04593	23.7647	0.053098	0.153639
	H5N5F1b	5	5	1					20.0262	1990.74	994.869	1990.68	994.84	46.3	606220736	0.730561	EIC (994.86; 995.34; 995.86)±0.3 -All MS	33.2	3.6528	3.6528	0.730561	0	0	0	1990.68	994.84	47.6	424859872	0.667894	EIC (994.86; 995.34; 995.86)±0.3 -All MS	25.9	3.33947	3.33947	0.667894	0	0	0	1990.68	46.95	515540304	0.699227	0.05783	29.0495	0.0443123	0.0633732
	H3N3F1	3	3	1					20.0262	1260.47		1260.47		46.6	178718768	0.215375	EIC (1260.47; 1261.53; 1262.35)±0.3 -All MS	16.9	0.646126	0.646126	0.215375	0	0	0	1260.45		47.5	95501648	0.150132	EIC (1260.47; 1261.53; 1262.35)±0.3 -All MS	11.4	0.450395	0.450395	0.150132	0	0	0	1260.46	47.05	137110208	0.182753	0.01343	10.6547	0.0461341	0.252439
	H3N4F1a	3	4	1					20.0262	1463.55	731.276	1463.56	731.28	47.4	385704128	0.464815	EIC (731.26; 731.78; 732.27)±0.3 -All MS	18.2	1.39444	1.85926	0.464815	0	0	0	1463.52	731.26	48.5	351535392	0.552625	EIC (731.32; 731.83; 732.32)±0.3 -All MS	16.8	1.65788	2.2105	0.552625	0	0	0	1463.54	47.95	368619760	0.50872	0.01283	8.76634	0.0620915	0.122054
	H5N3F1b	5	3	1					20.0262	1584.58	791.79	1584.54	791.77	47.5	188161712	0.226755	EIC (791.83; 792.31; 792.88)±0.3 -All MS	9.8	1.13377	0.680265	0.226755	0	0	0	1584.58	791.79	48.6	138955456	0.218443	EIC (791.83; 792.31; 792.88)±0.3 -All MS	6	1.09221	0.655328	0.218443	0	0	0	1584.56	48.05	163558584	0.222599	0.01903	12.0095	0.00587775	0.0264051
	H3N2	3	2						20.0262	911.336		911.32		48.3	554428288	0.668145	EIC (911.39; 912.39; 913.43)±0.3 -All MS	23.6	2.00444	1.33629	0	0	0	0	1823.7	911.35	49.4	348246080	0.547454	EIC (911.39; 912.39; 913.43)±0.3 -All MS	18	1.64236	1.09491	0	0	0	0	1367.51	48.85	451337184	0.6078	-456.174	-500555	0.0853414	0.14041
	H3N4F1b	3	4	1					20.0262	1463.55	731.276	1463.56	731.28	48.8	409916160	0.493993	EIC (731.26; 731.78; 732.27)±0.3 -All MS	18.5	1.48198	1.97597	0.493993	0	0	0	1463.5	731.25	49.8	415493952	0.65317	EIC (731.32; 731.83; 732.32)±0.3 -All MS	19.3	1.95951	2.61268	0.65317	0	0	0	1463.53	49.3	412705056	0.573581	0.02283	15.599	0.112555	0.196233
	H5N5F2	5	5	2					20.0262	2136.8	1067.9	2136.76	1067.88	50.1	587619072	0.708144	EIC (1067.88; 1068.37; 1068.91)±0.3 -All MS	33.2	3.54072	3.54072	1.41629	0	0	0	2136.76	1067.88	51	303475808	0.477074	EIC (1067.88; 1068.37; 1068.91)±0.3 -All MS	26.2	2.38537	2.38537	0.954148	0	0	0	2136.76	50.55	445547440	0.592609	0.03573	16.7213	0.163391	0.275715
	H5N2b	5	2						20.0262	1235.44		2471.84	1235.42	50.2	2203189248	2.65508	EIC (1235.42; 1236.43; 1237.41)±0.3 -All MS	191.7	13.2754	5.31016	0	0	0	0	1235.43		51.2	1255631872	1.97389	EIC (1235.42; 1236.43; 1237.41)±0.3 -All MS	114.4	9.86947	3.94779	0	0	0	0	1853.64	50.7	1729410560	2.31449	-618.193	-500382	0.48167	0.208111
	H6N3F1b	6	3	1					20.0262	1746.63	872.816	1746.68	872.84	50.3	300022976	0.36156	EIC (872.82; 873.32; 873.81)±0.3 -All MS	8.3	2.16936	1.08468	0.36156	0	0	0	1746.64	872.82	51.3	184351024	0.289806	EIC (872.82; 873.32; 873.81)±0.3 -All MS	16.8	1.73884	0.869418	0.289806	0	0	0	1746.66	50.8	242187000	0.325683	-0.02817	-16.1282	0.0507376	0.155788
	H5N3S1b	5	3		1				20.0262	1729.62	864.308	1729.64	864.32	51.2	144275616	0.173868	EIC (864.31; 864.81; 865.28)±0.3 -All MS	10.1	0.869338	0.521603	0	0.173868	0	0	1729.62	864.31	51.5	118533864	0.186339	EIC (864.31; 864.81; 865.28)±0.3 -All MS	9.2	0.931696	0.559017	0	0.186339	0	0	1729.63	51.35	131404740	0.180103	-0.01347	-7.78785	0.00881877	0.048965
	H2N2F1	2	2	1					20.0262	895.341		1791.68	895.34	50.6	3151709696	3.79815	EIC (895.44; 896.45; 897.43)±0.3 -All MS	171.9	7.59629	7.59629	3.79815	0	0	0	1791.68	895.34	51.9	2603212800	4.09234	EIC (895.44; 896.45; 897.43)±0.3 -All MS	129.3	8.18467	8.18467	4.09234	0	0	0	1791.68	51.25	2877461248	3.94524	-896.339	-1.00111e+06	0.208024	0.0527277
	H4N4F1b	4	4	1					20.0262	1625.61	812.303	1625.58	812.29	50.8	396484224	0.477806	EIC (812.36; 812.87; 813.34)±0.3 -All MS	27.3	1.91122	1.91122	0.477806	0	0	0	1625.56	812.28	52.1	191216080	0.300598	EIC (812.36; 812.87; 813.34)±0.3 -All MS	16.5	1.20239	1.20239	0.300598	0	0	0	1625.57	51.45	293850152	0.389202	0.03563	21.918	0.125305	0.321953
	H5N4F1S1b	5	4	1	1				20.0262	2078.75	1038.88	2078.74	1038.87	51.9	165272752	0.199171	EIC (1038.95; 1039.45; 1039.95)±0.3 -All MS	12.4	0.995857	0.796685	0.199171	0.199171	0	0	2078.66	1038.83	52.4	163059216	0.256334	EIC (1038.95; 1039.45; 1039.95)±0.3 -All MS	11.3	1.28167	1.02534	0.256334	0.256334	0	0	2078.7	52.15	164165984	0.227753	0.05383	25.8953	0.0404205	0.177475
	H6N3S1b	6	3		1				20.0262	1891.67	945.335	1891.62	945.31	53.4	255240800	0.307592	EIC (945.38; 945.88; 946.34)±0.3 -All MS	11.6	1.84555	0.922777	0	0.307592	0	0	1891.62	945.31	54	162144960	0.254897	EIC (945.38; 945.88; 946.34)±0.3 -All MS	11.2	1.52938	0.764692	0	0.254897	0	0	1891.62	53.7	208692880	0.281245	0.04933	26.0775	0.0372611	0.132486
	H5N4F1b	5	4	1					20.0262	1787.66	893.329	1787.62	893.31	53.2	213449584	0.25723	EIC (893.39; 893.91; 894.39)±0.3 -All MS	11.6	1.28615	1.02892	0.25723	0	0	0	1787.64	893.32	54.3	222804944	0.350257	EIC (893.39; 893.91; 894.39)±0.3 -All MS	9.2	1.75128	1.40103	0.350257	0	0	0	1787.63	53.75	218127264	0.303743	0.02843	15.9035	0.0657802	0.216565
	H5N4S2b	5	4		2				20.0262	2223.79	1111.4	2223.72	1111.36	54.3	217049312	0.261568	EIC (1111.46; 1111.95; 1112.46)±0.3 -All MS	16.9	1.30784	1.04627	0	0.523135	0	0	2223.74	1111.37	54.7	118787544	0.186738	EIC (1111.46; 1111.95; 1112.46)±0.3 -All MS	13	0.93369	0.746952	0	0.373476	0	0	2223.73	54.5	167918428	0.224153	0.06133	27.579	0.0529126	0.236056
	H3N2F1	3	2	1					20.0262	1057.39		1057.39		57.1	2141860352	2.58117	EIC (1057.48; 1058.50; 1059.49)±0.3 -All MS	126.3	7.74351	5.16234	2.58117	0	0	0	1057.38		58.1	1405883648	2.2101	EIC (1057.48; 1058.50; 1059.49)±0.3 -All MS	91.8	6.63029	4.42019	2.2101	0	0	0	1057.39	57.6	1773872000	2.39563	0.00903	8.53986	0.26239	0.109528
															82980196040	100			6.76968	2.36311	0.165149	0.0260717	0.0173671	0.106196				63611894800	100			6.78299	2.3278	0.151147	0.0205347	0.0144629	0.127073				100

## Sheet: T.S2-2 Co115
Table S2-2. N-glycans present in Co115 cell line, retention times (min), peak areas, relative abundances with standard deviation and relative standard deviation (CV), and calculations of monosaccharide average compositions for each technical replicate. H = hexose; N = N-acetylhexosamine; F = deoxyhexose; S = N-acetylneuraminic acid; Su = Sulfate; P = Phosphate.
		162.053	203.079	146.058	291.095	79.9568	79.9663	-1.00727
Composition		H	N	F	S	Su	P	H+	Reduced Reducing end mass	Theoretical		Technical replicate 1													Technical replicate 2													Average
										[M-H]1-	[M-2H]2-	[M-H]1- obv.	[M-2H]2- obv.	RT (min)	Peak area	Rel. peak area (%)	Trace	S/N	H	N	F	S	Su	P	[M-H]1- obv.	[M-2H]2- obv.	RT (min)	Peak area	Rel. peak area (%)	Trace	S/N	H	N	F	S	Su	P	[M-H]1- obv	RT avg (min)	Peak area	Rel. peak area (%)	m/z error	ppm error	SD (%)	CV (%)
	H10N2P1	10	2				1		20.0262	2125.67	1062.34	2125.6	1062.3	34.9	203316352	0.322472	EIC (1062.38; 1062.87; 1063.30)±0.3 -All MS	13.3	0	0.644944	0	0	0	0.322472	2125.6	1062.3	35	166434688	0.248469	EIC (1062.38; 1062.87; 1063.30)±0.3 -All MS	16	2.48469	0.496938	0	0	0	0.248469	2125.6	34.95	184875520	0.285471	0.07203	33.8858	0.0523279	0.183304
	H6N3Su1b	6	3			1			20.0262	1680.53	839.765	1680.54	839.77	37.1	444839584	0.705542	EIC (839.77; 840.27; 840.79)±0.3 -All MS	18	4.23325	2.11663	0	0	0.705542	0	1680.5	839.75	37.5	623390976	0.930656	EIC (839.77; 840.27; 840.79)±0.3 -All MS	39.2	5.58394	2.79197	0	0	0.930656	0	1680.52	37.3	534115280	0.818099	0.01073	6.38489	0.15918	0.194572
	H8N3Su1	8	3			1			20.0262	2004.64	1001.82	2004.64	1001.82	37.4	359005888	0.569405	EIC (1001.79; 1002.30; 1002.80)±0.3 -All MS	19.8	4.55524	1.70822	0	0	0.569405	0	2004.6	1001.8	37.9	311316512	0.464762	EIC (1001.79; 1002.30; 1002.80)±0.3 -All MS	24.7	3.7181	1.39429	0	0	0.464762	0	2004.62	37.65	335161200	0.517084	0.01633	8.14612	0.0739935	0.143098
	H8N2	8	2						20.0262	1721.6	860.3	1721.62	860.31	39.8	12802353152	20.3053	EIC (860.31; 860.81; 861.30)±0.3 -All MS	471.4	162.442	40.6106	0	0	0	0	1721.6	860.3	40.9	15418122240	23.0176	EIC (860.31; 860.81; 861.30)±0.3 -All MS	617	184.141	46.0352	0	0	0	0	1721.61	40.35	14110237696	21.6615	-0.00987	-5.73304	1.91789	0.0885393
	H7N2a	7	2						20.0262	1559.55	779.274	1559.56	779.28	39.8	7629048832	12.1001	EIC (779.33; 779.84; 780.33)±0.3 -All MS	256.1	84.7009	24.2003	0	0	0	0	1559.5	779.25	41	9773375488	14.5906	EIC (779.33; 779.84; 780.33)±0.3 -All MS	404.1	102.134	29.1812	0	0	0	0	1559.53	40.4	8701212160	13.3454	0.01733	11.1122	1.76103	0.131958
	H9N2	9	2						20.0262	1883.65	941.326	1883.62	941.31	40.3	9175706624	14.5532	EIC (941.31; 941.82; 942.31)±0.3 -All MS	359	130.979	29.1064	0	0	0	0	1883.6	941.3	41.3	9553479680	14.2623	EIC (941.31; 941.82; 942.31)±0.3 -All MS	479.4	128.361	28.5247	0	0	0	0	1883.61	40.8	9364593152	14.4078	0.04293	22.7908	0.205696	0.0142767
	H7N2b	7	2						20.0262	1559.55	779.274	1559.56	779.28	41.5	2257403392	3.58038	EIC (779.33; 779.84; 780.33)±0.3 -All MS	63.7	25.0626	7.16076	0	0	0	0	1559.5	779.25	42.6	3199769088	4.77691	EIC (779.33; 779.84; 780.33)±0.3 -All MS	101.6	33.4384	9.55383	0	0	0	0	1559.53	42.05	2728586240	4.17865	0.01733	11.1122	0.846079	0.202477
	H6N2a	6	2						20.0262	1397.49	698.247	1397.5	698.25	41.7	8079588352	12.8147	EIC (698.28; 698.77; 699.27; 1397.56; 1398.53; 1399.52)±0.3 -All MS	185.6	76.8883	25.6294	0	0	0	0	1397.46	698.23	42.8	9760294912	14.5711	EIC (698.28; 698.77; 699.27; 1397.56; 1398.53; 1399.52)±0.3 -All MS	296.5	87.4265	29.1422	0	0	0	0	1397.48	42.25	8919941632	13.6929	0.01453	10.3972	1.24194	0.0906994
	H10N2	10	2						20.0262	2045.71	1022.35	2045.68	1022.34	42.4	792936512	1.25765	EIC (1022.42; 1022.91; 1023.46)±0.3 -All MS	36.8	12.5765	2.51529	0	0	0	0	2045.66	1022.33	43.3	736630656	1.09971	EIC (1022.42; 1022.91; 1023.46)±0.3 -All MS	69.7	10.9971	2.19942	0	0	0	0	2045.67	42.85	764783584	1.17868	0.03573	17.4659	0.111676	0.0947471
	H4N3S1a	4	3		1				20.0262	1567.56	783.282	1567.52	783.26	43	210303456	0.333554	EIC (783.27; 783.79; 784.25)±0.3 -All MS	8.6	1.33422	1.00066	0	0.333554	0	0	1567.54	783.27	43.3	251193504	0.375005	EIC (783.27; 783.79; 784.25)±0.3 -All MS	13.5	1.50002	1.12502	0	0.375005	0	0	1567.53	43.15	230748480	0.35428	0.03373	21.5175	0.0293104	0.0827324
	H4N2b	4	2						20.0262	1073.39		1073.4		43.5	182644096	0.289685	EIC (1073.46; 1074.46; 1075.46)±0.3 -All MS	10.9	1.15874	0.579369	0	0	0	0	1073.36		44.7	179869184	0.268526	EIC (1073.46; 1074.46; 1075.46)±0.3 -All MS	15.9	1.0741	0.537051	0	0	0	0	1073.38	44.1	181256640	0.279105	0.00893	8.31944	0.0149617	0.053606
	H6N2b	6	2						20.0262	1397.49	698.247	1397.48	698.24	43.6	561030848	0.889829	EIC (698.28; 698.77; 699.27; 1397.56; 1398.53; 1399.52)±0.3 -All MS	11.1	5.33897	1.77966	0	0	0	0	1397.46	698.23	44.8	635679040	0.949001	EIC (698.28; 698.77; 699.27; 1397.56; 1398.53; 1399.52)±0.3 -All MS	17.8	5.69401	1.898	0	0	0	0	1397.47	44.2	598354944	0.919415	0.02453	17.5528	0.0418411	0.0455084
	H6N3S1a	6	3		1				20.0262	1891.67	945.335	1891.66	945.33	44.6	465710272	0.738645	EIC (945.38; 945.88; 946.34)±0.3 -All MS	27.4	4.43187	2.21593	0	0.738645	0	0	1891.6	945.3	45.1	465510784	0.694958	EIC (945.38; 945.88; 946.34)±0.3 -All MS	34.7	4.16975	2.08487	0	0.694958	0	0	1891.63	44.85	465610528	0.716801	0.03933	20.7912	0.0308911	0.0430958
	H5N4S2a	5	4		2				20.0262	2223.79	1111.4	2223.76	1111.38	46.1	113415552	0.179884	EIC (1111.46; 1111.95; 1112.46)±0.3 -All MS	9.8	0.89942	0.719536	0	0.359768	0	0	2223.74	1111.37	46.3	276195616	0.412331	EIC (1111.46; 1111.95; 1112.46)±0.3 -All MS	18.5	2.06165	1.64932	0	0.824661	0	0	2223.75	46.2	194805584	0.296107	0.04133	18.5854	0.164365	0.555085
	H5N4S1a	5	4		1				20.0262	1932.7	965.848	1932.7	965.85	46.3	1263789824	2.00445	EIC (965.90; 966.39; 966.93)±0.3 -All MS	56.3	10.0222	8.01779	0	2.00445	0	0	1932.64	965.82	47.1	1126054272	1.68108	EIC (965.90; 966.39; 966.93)±0.3 -All MS	58.3	8.40539	6.72432	0	1.68108	0	0	1932.67	46.7	1194922048	1.84276	0.02593	13.4165	0.228656	0.124083
	H5N3F1S1a	5	3	1	1				20.0262	1875.67	937.337	1875.66	937.33	46.9	455623488	0.722646	EIC (937.31; 937.81; 938.29)±0.3 -All MS	19.4	3.61323	2.16794	0.722646	0.722646	0	0	1875.6	937.3	47.4	496463648	0.741167	EIC (937.31; 937.81; 938.33)±0.3 -All MS	33.2	3.70584	2.2235	0.741167	0.741167	0	0	1875.63	47.15	476043568	0.731907	0.04443	23.6875	0.0130963	0.0178934
	H3N2	3	2						20.0262	911.336		911.35		48.1	175418048	0.278224	EIC (911.39; 912.39; 913.43)±0.3 -All MS	6.5	0.834671	0.556447	0	0	0	0	911.33		49.3	193666624	0.289124	EIC (911.35; 912.35; 913.31)±0.3 -All MS	10.5	0.867371	0.578247	0	0	0	0	#REF!	48.7	184542336	0.283674	#REF!	#REF!	0.00770747	0.0271702
	H4N3F1S1a	4	3	1	1				20.0262	1713.62	856.311	1713.66	856.33	49.1	325753440	0.516665	EIC (856.39; 856.90; 857.37)±0.3 -All MS	14.8	2.06666	1.54999	0.516665	0.516665	0	0	1713.62	856.31	49.7	330315776	0.493126	EIC (856.39; 856.90; 857.37)±0.3 -All MS	17.7	1.9725	1.47938	0.493126	0.493126	0	0	1713.64	49.4	328034608	0.504895	-0.01837	-10.72	0.0166441	0.0329655
	H7N3S1	7	3		1				20.0262	2053.72	1026.36	2053.68	1026.34	49.8	171568176	0.272117	EIC (1026.33; 1026.89; 1027.37)±0.3 -All MS	9.4	1.90482	0.816352	0	0.272117	0	0	2053.66	1026.33	50.5	159530736	0.238162	EIC (1026.33; 1026.89; 1027.37)±0.3 -All MS	13.6	1.66714	0.714487	0	0.238162	0	0	2053.67	50.15	165549456	0.25514	0.05213	25.3832	0.0240099	0.0941048
	H5N2b	5	2						20.0262	1235.44		1235.43		50	754072384	1.196	EIC (1235.42; 1236.43; 1237.41)±0.3 -All MS	54.3	5.98002	2.39201	0	0	0	0	1235.42		51.1	523847136	0.782048	EIC (1235.42; 1236.43; 1237.41)±0.3 -All MS	57.2	3.91024	1.5641	0	0	0	0	1235.43	50.55	638959760	0.989026	0.01673	13.5417	0.292711	0.295959
	H6N3F1S1	6	3	1	1				20.0262	2037.73	1018.36	2037.7	1018.35	50.1	109934232	0.174362	EIC (1018.35; 1018.83; 1019.40)±0.3 -All MS	8.7	1.04617	0.523087	0.174362	0.174362	0	0	2037.64	1018.32	50.7	173434320	0.258919	EIC (1018.35; 1018.83; 1019.40)±0.3 -All MS	12.8	1.55351	0.776757	0.258919	0.258919	0	0	2037.67	50.4	141684276	0.216641	0.05723	28.0852	0.0597906	0.27599
	H5N4F1S2a	5	4	1	2				20.0262	2369.85	1184.42	2369.8	1184.4	50.9	1249635072	1.982	EIC (1184.47; 1184.96; 1185.50)±0.3 -All MS	51.7	9.90998	7.92799	1.982	3.96399	0	0	2369.78	1184.39	51.1	812905408	1.21358	EIC (1184.47; 1184.96; 1185.50)±0.3 -All MS	44.6	6.06791	4.85432	1.21358	2.42716	0	0	2369.79	51	1031270240	1.59779	0.05923	24.9932	0.543352	0.340065
	H2N2F1	2	2	1					20.0262	895.341		1791.68	895.34	50.4	455684992	0.722744	EIC (895.44; 896.45; 897.43)±0.3 -All MS	17.4	1.44549	1.44549	0.722744	0	0	0	1791.64	895.32	51.7	574712960	0.857985	EIC (895.44; 896.45; 897.43)±0.3 -All MS	39.1	1.71597	1.71597	0.857985	0	0	0	1791.66	51.05	515198976	0.790365	-896.319	-1.00109e+06	0.09563	0.120995
	H5N3S1b	5	3		1				20.0262	1729.62	864.308	1729.6	864.3	51.1	252361088	0.40026	EIC (864.31; 864.81; 865.28)±0.3 -All MS	12.1	2.0013	1.20078	0	0.40026	0	0	1729.56	864.28	51.6	369737440	0.551979	EIC (864.31; 864.81; 865.28)±0.3 -All MS	21.7	2.75989	1.65594	0	0.551979	0	0	1729.58	51.35	311049264	0.476119	0.03653	21.1203	0.107281	0.225324
	H5N4F1S1b	5	4	1	1				20.0262	2078.75	1038.88	2078.74	1038.87	51.8	2606459392	4.134	EIC (1038.95; 1039.45; 1039.95)±0.3 -All MS	102	20.67	16.536	4.134	4.134	0	0	2078.7	1038.85	52.5	2207270400	3.29522	EIC (1038.95; 1039.45; 1039.95)±0.3 -All MS	134	16.4761	13.1809	3.29522	3.29522	0	0	2078.72	52.15	2406864896	3.71461	0.03383	16.2742	0.593109	0.159669
	H6N3S1b	6	3		1				20.0262	1891.67	945.335	1891.64	945.32	53.4	194236736	0.308071	EIC (945.38; 945.88; 946.34)±0.3 -All MS	12.4	1.84843	0.924214	0	0.308071	0	0	1891.64	945.32	53.8	174778976	0.260926	EIC (945.38; 945.88; 946.34)±0.3 -All MS	11.3	1.56556	0.782779	0	0.260926	0	0	1891.64	53.6	184507856	0.284499	0.02933	15.5048	0.0333364	0.117176
	H5N4F1b	5	4	1					20.0262	1787.66	893.329	1787.64	893.32	53.1	139249760	0.220859	EIC (893.39; 893.91; 894.39)±0.3 -All MS	6.6	1.10429	0.883434	0.220859	0	0	0	1787.6	893.3	54.3	85216640	0.127219	EIC (893.39; 893.91; 894.39)±0.3 -All MS	8.6	0.636097	0.508877	0.127219	0	0	0	1787.62	53.7	112233200	0.174039	0.03843	21.4974	0.0662129	0.380449
	H5N4S2b	5	4		2				20.0262	2223.79	1111.4	2223.78	1111.39	54.6	1162774912	1.84423	EIC (1111.46; 1111.95; 1112.46)±0.3 -All MS	57.4	9.22116	7.37692	0	3.68846	0	0	2223.7	1111.35	54.5	418459616	0.624716	EIC (1111.46; 1111.95; 1112.46)±0.3 -All MS	31.2	3.12358	2.49886	0	1.24943	0	0	2223.74	54.55	790617264	1.23447	0.05133	23.0822	0.862328	0.698539
	H5N4S1b	5	4		1				20.0262	1932.7	965.848	1932.68	965.84	55.3	496096160	0.786838	EIC (965.90; 966.39; 966.93)±0.3 -All MS	19.9	3.93419	3.14735	0	0.786838	0	0	1932.64	965.82	55.8	375306848	0.560293	EIC (965.90; 966.39; 966.93)±0.3 -All MS	17.3	2.80147	2.24117	0	0.560293	0	0	1932.66	55.55	435701504	0.673566	0.03593	18.5906	0.160192	0.237826
	H5N3F1S1b	5	3	1	1				20.0262	1875.67	937.337	1875.64	937.32	56	187151936	0.296834	EIC (937.31; 937.81; 938.29)±0.3 -All MS	8.2	1.48417	0.890503	0.296834	0.296834	0	0	1875.64	937.32	56.6	301282624	0.449783	EIC (937.31; 937.81; 938.33)±0.3 -All MS	18.4	2.24891	1.34935	0.449783	0.449783	0	0	1875.64	56.3	244217280	0.373309	0.03443	18.3561	0.108151	0.289709
	H3N2F1	3	2	1					20.0262	1057.39		1057.4		57	740599296	1.17464	EIC (1057.48; 1058.50; 1059.49)±0.3 -All MS	49.3	3.52391	2.34927	1.17464	0	0	0	1057.39		58.1	965104320	1.4408	EIC (1057.48; 1058.50; 1059.49)±0.3 -All MS	78.1	4.32239	2.8816	1.4408	0	0	0	1057.39	57.55	852851808	1.30772	-0.00097	-0.91735	0.188205	0.143919
	H5N4S2c	5	4		2				20.0262	2223.79	1111.4	2223.78	1111.39	58.4	126260008	0.200256	EIC (1111.46; 1111.95; 1112.46)±0.3 -All MS	8.6	1.00128	0.801024	0	0.400512	0	0	2223.7	1111.35	58.3	70885648	0.105825	EIC (1111.46; 1111.95; 1112.46)±0.3 -All MS	6.9	0.529124	0.423299	0	0.211649	0	0	2223.74	58.35	98572828	0.15304	0.05133	23.0822	0.066773	0.43631
	H5N4F1S2b	5	4	1	2				20.0262	2369.85	1184.42	2369.82	1184.41	59	5147473920	8.1642	EIC (1184.47; 1184.96; 1185.50)±0.3 -All MS	346.9	40.821	32.6568	8.1642	16.3284	0	0	2369.78	1184.39	59	3542669312	5.28883	EIC (1184.47; 1184.96; 1185.50)±0.3 -All MS	265.8	26.4441	21.1553	5.28883	10.5777	0	0	2369.8	59	4345071616	6.72652	0.04923	20.7735	2.0332	0.302266
	H5N4F1S1c	5	4	1	1				20.0262	2078.75	1038.88	2078.74	1038.87	60.2	826913408	1.31153	EIC (1038.95; 1039.45; 1039.95)±0.3 -All MS	26.4	6.55767	5.24614	1.31153	1.31153	0	0	2078.68	1038.84	60.9	765841536	1.14332	EIC (1038.95; 1039.45; 1039.95)±0.3 -All MS	42.5	5.7166	4.57328	1.14332	1.14332	0	0	2078.71	60.55	796377472	1.22743	0.04383	21.0847	0.118946	0.0969066
	H5N4S2d	5	4		2				20.0262	2223.79	1111.4	2223.76	1111.38	61.8	844098816	1.33879	EIC (1111.46; 1111.95; 1112.46)±0.3 -All MS	42.1	6.69396	5.35517	0	2.67758	0	0	2223.72	1111.36	61.7	594532928	0.887574	EIC (1111.46; 1111.95; 1112.46)±0.3 -All MS	52.7	4.43787	3.5503	0	1.77515	0	0	2223.74	61.75	719315872	1.11318	0.05133	23.0822	0.319059	0.286619
	H5N4F1S2c	5	4	1	2				20.0262	2369.85	1184.42	2369.8	1184.4	62.6	371117984	0.588616	EIC (1184.47; 1184.96; 1185.50)±0.3 -All MS	19.4	2.94308	2.35446	0.588616	1.17723	0	0	2369.78	1184.39	62.4	255859456	0.381971	EIC (1184.47; 1184.96; 1185.50)±0.3 -All MS	15	1.90985	1.52788	0.381971	0.763942	0	0	2369.79	62.5	313488720	0.485293	0.05923	24.9932	0.14612	0.301096
	H5N4F1S2d	5	4	1	2				20.0262	2369.85	1184.42	2369.82	1184.41	66.1	1715726592	2.72125	EIC (1184.47; 1184.96; 1185.50)±0.3 -All MS	84.5	13.6062	10.885	2.72125	5.44249	0	0	2369.8	1184.4	65.8	1114880000	1.6644	EIC (1184.47; 1184.96; 1185.50)±0.3 -All MS	77.1	8.32198	6.65759	1.6644	3.32879	0	0	2369.81	65.95	1415303296	2.19282	0.03923	16.5538	0.747305	0.340796
															63049302576	100			0	2.55992	0.227303	0.460384	0.0127495	0.00322472				66984018992	100			6.83944	2.40232	0.173563	0.319024	0.0139542	0.00248469				100

## Sheet: T.S2-3 Colo205-VUMC
Table S2-3. N-glycans present in Colo205 cell line, retention times (min), peak areas, relative abundances with standard deviation and relative standard deviation (CV), and calculations of monosaccharide average compositions for each technical replicate. H = hexose; N = N-acetylhexosamine; F = deoxyhexose; S = N-acetylneuraminic acid; Su = Sulfate; P = Phosphate.
		162.053	203.079	146.058	291.095	79.9568	79.9663	-1.00727
Composition		H	N	F	S	Su	P	H+	Reduced Reducing end mass	Theoretical		Technical replicate 1													Technical replicate 2													Average
										[M-H]1-	[M-2H]2-	[M-H]1- obv.	[M-2H]2- obv.	RT (min)	Peak area	Rel. peak area (%)		S/N	H	N	F	S	Su	P	[M-H]1- obv.	[M-2H]2- obv.	RT (min)	Peak area	Rel. peak area (%)		S/N	H	N	F	S	Su	P	[M-H]1- obv	RT avg (min)	Peak area	Rel. peak area (%)	m/z error	ppm error	SD (%)	CV (%)
	H7N2P2	7	2				2		20.0262	1719.48	859.24	1719.46	859.23	29.3	749274112	1.08796	EIC (859.23; 859.72; 860.24)±0.3 -All MS	29	7.6157	2.17591	0	0	0	2.17591	1719.42	859.21	29.5	1076592768	1.51709	EIC (859.23; 859.72; 860.24)±0.3 -All MS	47.9	10.6196	3.03417	0	0	0	3.03417	1719.44	29.4	912933440	1.30252	0.03993	23.2221	0.30344	0.232964
	H8N2P2	8	2				2		20.0262	1881.53	940.266	1881.5	940.25	29.7	135956512	0.197411	EIC (940.22; 940.71; 941.21)±0.3 -All MS	6.1	1.57929	0.394822	0	0	0	0.394822	1881.44	940.22	30	160289696	0.225873	EIC (940.22; 940.71; 941.21)±0.3 -All MS	8.8	1.80699	0.451746	0	0	0	0.451746	1881.47	29.85	148123104	0.211642	0.06273	33.3398	0.0201258	0.0950938
	H10N2P1	10	2				1		20.0262	2125.67	1062.34	2125.62	1062.31	34.7	163435408	0.237311	EIC (1062.38; 1062.87; 1063.30)±0.3 -All MS	19.3	2.37311	0.474621	0	0	0	0.237311	2125.6	1062.3	35.2	169965888	0.239508	EIC (1062.38; 1062.87; 1063.30)±0.3 -All MS	14.6	2.39508	0.479017	0	0	0	0.239508	2125.61	34.95	166700648	0.23841	0.06203	29.1814	0.00155403	0.00651833
	H6N2P1a	6	2				1		20.0262	1477.46	738.23	1477.42	738.21	35.4	752992320	1.09336	EIC (738.21; 738.73; 739.21; 1477.43; 1478.44; 1479.38)±0.3 -All MS	33.9	6.56014	2.18671	0	0	0	1.09336	1477.44	738.22	35.7	860595520	1.21271	EIC (738.21; 738.73; 739.21; 1477.43; 1478.44; 1479.38)±0.3 -All MS	39.4	7.27628	2.42543	0	0	0	1.21271	1477.43	35.55	806793920	1.15303	0.03083	20.8669	0.0843981	0.0731965
	H7N2P1	7	2				1		20.0262	1639.51	819.257	1639.44	819.22	35.4	1694665472	2.46068	EIC (819.24; 819.73; 820.24)±0.3 -All MS	76.4	17.2248	4.92136	0	0	0	2.46068	1639.48	819.24	35.7	1807739776	2.54739	EIC (819.24; 819.73; 820.24)±0.3 -All MS	66.8	17.8317	5.09477	0	0	0	2.54739	1639.46	35.55	1751202624	2.50403	0.05363	32.7109	0.0613112	0.024485
	H8N2P1	8	2				1		20.0262	1801.57	900.283	1801.54	900.27	35.6	225603520	0.32758	EIC (900.24; 900.73; 901.23)±0.3 -All MS	11.1	2.62064	0.655159	0	0	0	0.32758	1801.56	900.28	35.7	294268480	0.41467	EIC (900.24; 900.73; 901.23)±0.3 -All MS	16.1	3.31736	0.82934	0	0	0	0.41467	1801.55	35.65	259936000	0.371125	0.01643	9.11984	0.0615822	0.165934
	H4N5	4	5						20.0262	1682.63	840.814	1682.62	840.81	36.3	255011632	0.370281	EIC (840.84; 841.30; 841.84)±0.3 -All MS	14.6	1.48112	1.8514	0	0	0	0	1682.6	840.8	36.8	388556960	0.547537	EIC (840.84; 841.30; 841.84)±0.3 -All MS	15.2	2.19015	2.73769	0	0	0	0	1682.61	36.55	321784296	0.458909	0.01713	10.1805	0.125339	0.273125
	H6N3Su1b	6	3			1			20.0262	1680.53	839.765	1680.5	839.75	37.3	567656256	0.824245	EIC (839.77; 840.27; 840.79)±0.3 -All MS	28.7	4.94547	2.47274	0	0	0.824245	0	1680.52	839.76	37.7	602142784	0.848513	EIC (839.77; 840.27; 840.79)±0.3 -All MS	32.9	5.09108	2.54554	0	0	0.848513	0	1680.51	37.5	584899520	0.836379	0.02073	12.3354	0.0171597	0.0205167
	H5N4b	5	4						20.0262	1641.6	820.3	1641.6	820.3	37.1	359881088	0.522553	EIC (820.30; 820.80; 821.33)±0.3 -All MS	11.5	2.61276	2.09021	0	0	0	0	1641.54	820.27	37.7	378518272	0.533391	EIC (820.30; 820.80; 821.33)±0.3 -All MS	16.9	2.66696	2.13356	0	0	0	0	1641.57	37.4	369199680	0.527972	0.03053	18.5977	0.00766393	0.0145158
	H8N3Su1	8	3			1			20.0262	2004.64	1001.82	2004.6	1001.8	37.7	458429824	0.665647	EIC (1001.79; 1002.30; 1002.80)±0.3 -All MS	28	5.32518	1.99694	0	0	0.665647	0	2004.56	1001.78	38.1	321047648	0.452406	EIC (1001.79; 1002.30; 1002.80)±0.3 -All MS	24.6	3.61925	1.35722	0	0	0.452406	0	2004.58	37.9	389738736	0.559027	0.05633	28.0999	0.150784	0.269726
	H7N3Su1	7	3			1			20.0262	1842.58	920.792	1842.64	920.82	37.7	496146080	0.720412	EIC (920.82; 921.30; 921.80)±0.3 -All MS	18.9	5.04288	2.16123	0	0	0.720412	0	1842.62	920.81	38.7	363239456	0.511861	EIC (920.82; 921.30; 921.80)±0.3 -All MS	12.9	3.58303	1.53558	0	0	0.511861	0	1842.63	38.2	429692768	0.616136	-0.04647	-25.22	0.147468	0.239342
	H6N2P1b	6	2				1		20.0262	1477.46	738.23	1477.46	738.23	38.3	685867072	0.995889	EIC (738.21; 738.73; 739.21; 1477.43; 1478.44; 1479.38)±0.3 -All MS	25.1	5.97534	1.99178	0	0	0	0.995889	1477.42	738.21	38.5	702142656	0.989428	EIC (738.21; 738.73; 739.21; 1477.43; 1478.44; 1479.38)±0.3 -All MS	30.4	5.93657	1.97886	0	0	0	0.989428	1477.44	38.4	694004864	0.992659	0.02083	14.0985	0.0045686	0.00460238
	H5N3F1a	5	3	1					20.0262	1584.58	791.79	1584.58	791.79	38.4	355313472	0.51592	EIC (791.83; 792.31; 792.88)±0.3 -All MS	13.2	2.5796	1.54776	0.51592	0	0	0	1584.54	791.77	38.9	281274432	0.396359	EIC (791.83; 792.31; 792.88)±0.3 -All MS	13.4	1.9818	1.18908	0.396359	0	0	0	1584.56	38.65	318293952	0.45614	0.01903	12.0095	0.0845424	0.185343
	H4N4F1a	4	4	1					20.0262	1625.61	812.303	1625.56	812.28	38.7	292974240	0.425403	EIC (812.36; 812.87; 813.34)±0.3 -All MS	16.7	1.70161	1.70161	0.425403	0	0	0	1625.56	812.28	39.5	257236624	0.362486	EIC (812.36; 812.87; 813.34)±0.3 -All MS	13.1	1.44995	1.44995	0.362486	0	0	0	1625.56	39.1	275105432	0.393945	0.04563	28.0695	0.0444887	0.112931
	H6N4b	6	4						20.0262	1803.65	901.327	1803.62	901.31	39.7	300158080	0.435834	EIC (901.31; 901.81; 902.29)±0.3 -All MS	14.8	2.615	1.74334	0	0	0	0	1803.62	901.31	40.3	291644256	0.410972	EIC (901.31; 901.81; 902.29)±0.3 -All MS	13.9	2.46583	1.64389	0	0	0	0	1803.62	40	295901168	0.423403	0.03333	18.4792	0.01758	0.0415207
	H7N2a	7	2						20.0262	1559.55	779.274	1559.52	779.26	40.4	4017168896	5.83299	EIC (779.33; 779.84; 780.33)±0.3 -All MS	160	40.8309	11.666	0	0	0	0	1559.52	779.26	40.9	3522618112	4.96392	EIC (779.33; 779.84; 780.33)±0.3 -All MS	221.7	34.7474	9.92783	0	0	0	0	1559.52	40.65	3769893504	5.39845	0.02733	17.5243	0.614527	0.113834
	H8N2	8	2						20.0262	1721.6	860.3	1721.58	860.29	40.6	16799624192	24.3933	EIC (860.36; 860.87; 861.34)±0.3 -All MS	692.6	195.146	48.7866	0	0	0	0	1721.56	860.28	41	18217517056	25.6713	EIC (860.36; 860.87; 861.34)±0.3 -All MS	693.6	205.371	51.3426	0	0	0	0	1721.57	40.8	17508570624	25.0323	0.03013	17.5012	0.90369	0.036101
	H9N2	9	2						20.0262	1883.65	941.326	1883.6	941.3	41.1	11638940672	16.8999	EIC (941.31; 941.82; 942.31)±0.3 -All MS	456.1	152.099	33.7998	0	0	0	0	1883.6	941.3	41.7	11888496640	16.7527	EIC (941.31; 941.82; 942.31)±0.3 -All MS	519.6	150.775	33.5055	0	0	0	0	1883.6	41.4	11763718656	16.8263	0.05293	28.0997	0.104068	0.00618481
	H5N3S1a	5	3		1				20.0262	1729.62	864.308	1729.6	864.3	41.5	639860352	0.929087	EIC (864.31; 864.81; 865.28)±0.3 -All MS	37.9	4.64543	2.78726	0	0.929087	0	0	1729.58	864.29	41.9	670570432	0.944938	EIC (864.31; 864.81; 865.28)±0.3 -All MS	44.2	4.72469	2.83481	0	0.944938	0	0	1729.59	41.7	655215392	0.937012	0.02653	15.3387	0.0112086	0.011962
	H7N2b	7	2						20.0262	1559.55	779.274	1559.56	779.28	42.2	2182995968	3.16974	EIC (779.33; 779.84; 780.33)±0.3 -All MS	92.2	22.1882	6.33949	0	0	0	0	1559.5	779.25	42.7	1408355712	1.98459	EIC (779.33; 779.84; 780.33)±0.3 -All MS	54.7	13.8921	3.96918	0	0	0	0	1559.53	42.45	1795675840	2.57717	0.01733	11.1122	0.838028	0.325174
	H6N2a	6	2						20.0262	1397.49	698.247	1397.46	698.23	42.5	9192973312	13.3483	EIC (698.28; 698.77; 699.27; 1397.56; 1398.53; 1399.52)±0.3 -All MS	232.2	80.09	26.6967	0	0	0	0	1397.44	698.22	43.1	9851782144	13.8827	EIC (698.28; 698.77; 699.27; 1397.56; 1398.53; 1399.52)±0.3 -All MS	289.4	83.2962	27.7654	0	0	0	0	1397.45	42.8	9522377728	13.6155	0.04453	31.8642	0.377849	0.0277514
	H6N3F1a	6	3	1					20.0262	1746.63	872.816	1746.62	872.81	42.9	638098560	0.926529	EIC (872.82; 873.32; 873.81)±0.3 -All MS	33.9	5.55917	2.77959	0.926529	0	0	0	1746.6	872.8	43.7	746835840	1.05241	EIC (872.82; 873.32; 873.81)±0.3 -All MS	39.7	6.31445	3.15722	1.05241	0	0	0	1746.61	43.3	692467200	0.989468	0.02183	12.4983	0.0890101	0.0899575
	H10N2	10	2						20.0262	2045.71	1022.35	2045.66	1022.33	43.1	1239173504	1.7993	EIC (1022.33; 1022.81; 1023.35)±0.3 -All MS	88.9	17.993	3.5986	0	0	0	0	2045.64	1022.32	43.9	1525804672	2.1501	EIC (1022.33; 1022.81; 1023.35)±0.3 -All MS	116.6	21.501	4.30019	0	0	0	0	2045.65	43.5	1382489088	1.9747	0.05573	27.2424	0.248052	0.125615
	H4N3S1a	4	3		1				20.0262	1567.56	783.282	1567.6	783.3	43.3	266234960	0.386577	EIC (783.27; 783.75; 784.28)±0.3 -All MS	11.8	1.54631	1.15973	0	0.386577	0	0	1567.52	783.26	44	334244000	0.471002	EIC (783.27; 783.75; 784.28)±0.3 -All MS	9.9	1.88401	1.41301	0	0.471002	0	0	1567.56	43.65	300239480	0.428789	0.00373	2.37949	0.0596973	0.139223
	H5N5S1b	5	5		1				20.0262	2135.78	1067.39	2135.72	1067.36	44.6	456554912	0.662925	EIC (1067.88; 1068.37; 1068.91)±0.3 -All MS	28.8	3.31462	3.31462	0	0.662925	0	0	2135.7	1067.35	45.1	428428224	0.603722	EIC (1067.88; 1068.37; 1068.91)±0.3 -All MS	26.9	3.01861	3.01861	0	0.603722	0	0	2135.71	44.85	442491568	0.633323	0.06533	30.5884	0.0418625	0.0660997
	H6N3S1a	6	3		1				20.0262	1891.67	945.335	1891.62	945.31	44.8	939288192	1.36386	EIC (945.38; 945.88; 946.34)±0.3 -All MS	60.2	8.18316	4.09158	0	1.36386	0	0	1891.64	945.32	45.3	956719296	1.34817	EIC (945.38; 945.88; 946.34)±0.3 -All MS	62.5	8.089	4.0445	0	1.34817	0	0	1891.63	45.05	948003744	1.35601	0.03933	20.7912	0.0110974	0.00818386
	H5N4F1S1a	5	4	1	1				20.0262	2078.75	1038.88	2078.7	1038.85	44.7	402992256	0.585151	EIC (1038.95; 1039.45; 1039.95)±0.3 -All MS	25.7	2.92575	2.3406	0.585151	0.585151	0	0	2078.66	1038.83	45.4	303152480	0.427189	EIC (1038.95; 1039.45; 1039.95)±0.3 -All MS	20	2.13595	1.70876	0.427189	0.427189	0	0	2078.68	45.05	353072368	0.50617	0.07383	35.5165	0.111696	0.220669
	H6N3	6	3						20.0262	1600.57	799.787	1600.56	799.78	45.4	856420992	1.24354	EIC (799.77; 800.29; 800.77)±0.3 -All MS	45.1	7.46122	3.73061	0	0	0	0	1600.54	799.77	46.2	904811264	1.27502	EIC (799.77; 800.29; 800.77)±0.3 -All MS	41.1	7.65012	3.82506	0	0	0	0	1600.55	45.8	880616128	1.25928	0.02393	14.9509	0.0222624	0.0176787
	H4N2b	4	2						20.0262	1073.39		1073.38		46	178871184	0.259724	EIC (1073.46; 1074.46; 1075.46)±0.3 -All MS	14.1	1.03889	0.519447	0	0	0	0	1073.38		46.5	233822752	0.329493	EIC (1073.46; 1074.46; 1075.46)±0.3 -All MS	17	1.31797	0.658985	0	0	0	0	1073.38	46.25	206346968	0.294608	0.00893	8.31944	0.0493341	0.167457
	H5N4S1a	5	4		1				20.0262	1932.7	965.848	1932.68	965.84	46.7	891395776	1.29432	EIC (965.90; 966.39; 966.93)±0.3 -All MS	54.3	6.4716	5.17728	0	1.29432	0	0	1932.64	965.82	47.3	1029175296	1.45027	EIC (965.90; 966.39; 966.93)±0.3 -All MS	59.4	7.25134	5.80107	0	1.45027	0	0	1932.66	47	960285536	1.37229	0.03593	18.5906	0.110272	0.080356
	H5N5F1b	5	5	1					20.0262	1990.74	994.869	1990.7	994.85	46.8	141578224	0.205574	EIC (994.86; 995.34; 995.86)±0.3 -All MS	8.3	1.02787	1.02787	0.205574	0	0	0	1990.62	994.81	47.7	152174352	0.214437	EIC (994.86; 995.34; 995.86)±0.3 -All MS	13.1	1.07219	1.07219	0.214437	0	0	0	1990.66	47.25	146876288	0.210006	0.07783	39.0961	0.00626754	0.0298447
	H5N4c	5	4						20.0262	1641.6	820.3	1641.6	820.3	47.6	194489712	0.282402	EIC (820.30; 820.80; 821.33)±0.3 -All MS	8.4	1.41201	1.12961	0	0	0	0	1641.54	820.27	48.4	229599744	0.323542	EIC (820.30; 820.80; 821.33)±0.3 -All MS	9.8	1.61771	1.29417	0	0	0	0	1641.57	48	212044728	0.302972	0.03053	18.5977	0.0290902	0.0960163
	H3N2	3	2						20.0262	911.336		911.34		49	976507904	1.4179	EIC (911.39; 912.39; 913.43)±0.3 -All MS	49.1	4.25371	2.83581	0	0	0	0	911.34		49.7	904331968	1.27434	EIC (911.39; 912.39; 913.43)±0.3 -All MS	51.1	3.82303	2.54869	0	0	0	0	911.34	49.35	940419936	1.34612	-0.00387	-4.24651	0.101512	0.0754105
	H3N4F1b	3	4	1					20.0262	1463.55	731.276	1463.52	731.26	49.4	304420384	0.442023	EIC (731.32; 731.83; 732.32)±0.3 -All MS	12.6	1.32607	1.76809	0.442023	0	0	0	1463.56	731.28	50	299316160	0.421783	EIC (731.32; 731.83; 732.32)±0.3 -All MS	14	1.26535	1.68713	0.421783	0	0	0	1463.54	49.7	301868272	0.431903	0.01283	8.76634	0.0143118	0.0331365
	H5N4F2S1a	5	4	2	1				20.0262	2224.81	1111.91	2224.76	1111.88	50.4	307135456	0.445965	EIC (1111.85; 1112.37; 1112.84)±0.3 -All MS	22.3	2.22983	1.78386	0.891931	0.445965	0	0	2224.74	1111.87	51.1	264928816	0.373326	EIC (1111.85; 1112.37; 1112.84)±0.3 -All MS	26.3	1.86663	1.4933	0.746652	0.373326	0	0	2224.75	50.75	286032136	0.409646	0.06173	27.7462	0.0513638	0.125386
	H5N2b	5	2						20.0262	1235.44		1235.42		50.8	2926401792	4.24918	EIC (1235.42; 1236.43; 1237.41)±0.3 -All MS	211.2	21.2459	8.49836	0	0	0	0	1235.41		51.5	2741763840	3.86357	EIC (1235.42; 1236.43; 1237.41)±0.3 -All MS	184.7	19.3179	7.72714	0	0	0	0	1235.41	51.15	2834082816	4.05638	0.02673	21.636	0.272665	0.067219
	H2N2F1	2	2	1					20.0262	895.341		895.33		51.3	484461376	0.703445	EIC (895.44; 896.45; 897.43)±0.3 -All MS	28.5	1.40689	1.40689	0.703445	0	0	0	895.33		52.1	505289536	0.712032	EIC (895.44; 896.45; 897.43)±0.3 -All MS	31.6	1.42406	1.42406	0.712032	0	0	0	895.33	51.7	494875456	0.707738	0.01123	12.5427	0.00607152	0.00857877
	H5N3S1b	5	3		1				20.0262	1729.62	864.308	1729.6	864.3	51.3	549948800	0.798534	EIC (864.31; 864.81; 865.28)±0.3 -All MS	26.5	3.99267	2.3956	0	0.798534	0	0	1729.54	864.27	51.9	591204352	0.833099	EIC (864.31; 864.81; 865.28)±0.3 -All MS	30.6	4.16549	2.4993	0	0.833099	0	0	1729.57	51.6	570576576	0.815816	0.04653	26.9019	0.0244412	0.0299592
	H5N4F1S1b	5	4	1	1				20.0262	2078.75	1038.88	2078.68	1038.84	52.2	369432192	0.536421	EIC (1038.95; 1039.45; 1039.95)±0.3 -All MS	19.5	2.68211	2.14568	0.536421	0.536421	0	0	2078.7	1038.85	52.8	579414528	0.816485	EIC (1038.95; 1039.45; 1039.95)±0.3 -All MS	30.1	4.08243	3.26594	0.816485	0.816485	0	0	2078.69	52.5	474423360	0.676453	0.06383	30.7059	0.198035	0.292755
	H4N3S1b	4	3		1				20.0262	1567.56	783.282	1567.54	783.27	52.6	209601360	0.304344	EIC (783.27; 783.75; 784.28)±0.3 -All MS	9.7	1.21738	0.913033	0	0.304344	0	0	1567.56	783.28	53	190825904	0.268903	EIC (783.27; 783.75; 784.28)±0.3 -All MS	11.3	1.07561	0.80671	0	0.268903	0	0	1567.55	52.8	200213632	0.286624	0.01373	8.75881	0.0250605	0.0874334
	H5N5S2	5	5		2				20.0262	2426.87	1212.94	2426.82	1212.91	52.6	180172832	0.261614	EIC (1212.91; 1213.44; 1213.92)±0.3 -All MS	17.7	1.30807	1.30807	0	0.523227	0	0	2426.74	1212.87	53.1	228823232	0.322448	EIC (1212.91; 1213.44; 1213.92)±0.3 -All MS	22.3	1.61224	1.61224	0	0.644895	0	0	2426.78	52.85	204498032	0.292031	0.09073	37.3856	0.0430161	0.1473
	H6N3S1b	6	3		1				20.0262	1891.67	945.335	1891.64	945.32	53.6	645238336	0.936896	EIC (945.38; 945.88; 946.34)±0.3 -All MS	41.1	5.62137	2.81069	0	0.936896	0	0	1891.62	945.31	54.2	627301952	0.883966	EIC (945.38; 945.88; 946.34)±0.3 -All MS	38.9	5.3038	2.6519	0	0.883966	0	0	1891.63	53.9	636270144	0.910431	0.03933	20.7912	0.0374269	0.041109
	H5N4S2b	5	4		2				20.0262	2223.79	1111.4	2223.76	1111.38	54.4	428575712	0.622298	EIC (1111.46; 1111.95; 1112.46)±0.3 -All MS	23.2	3.11149	2.48919	0	1.2446	0	0	2223.7	1111.35	54.8	412738720	0.581613	EIC (1111.46; 1111.95; 1112.46)±0.3 -All MS	28.9	2.90807	2.32645	0	1.16323	0	0	2223.73	54.6	420657216	0.601956	0.06133	27.579	0.0287688	0.0477922
	H5N4S1b	5	4		1				20.0262	1932.7	965.848	1932.68	965.84	55.7	184385424	0.26773	EIC (965.90; 966.39; 966.93)±0.3 -All MS	9.5	1.33865	1.07092	0	0.26773	0	0	1932.6	965.8	55.9	285059936	0.401694	EIC (965.90; 966.39; 966.93)±0.3 -All MS	12.4	2.00847	1.60678	0	0.401694	0	0	1932.64	55.8	234722680	0.334712	0.05593	28.9389	0.0947264	0.283009
	H5N5F1S2	5	5	1	2				20.0262	2572.93	1285.96	2572.9	1285.95	56.5	143557152	0.208447	EIC (1285.92; 1286.45; 1286.93)±0.3 -All MS	10.8	1.04224	1.04224	0.208447	0.416894	0	0	2572.78	1285.89	57.2	160650240	0.226381	EIC (1285.92; 1286.45; 1286.93)±0.3 -All MS	11.4	1.13191	1.13191	0.226381	0.452762	0	0	2572.84	56.85	152103696	0.217414	0.08863	34.4471	0.0126813	0.0583278
	H3N2F1	3	2	1					20.0262	1057.39		1057.38		57.7	2042619008	2.96591	EIC (1057.48; 1058.50; 1059.49)±0.3 -All MS	113.5	8.89774	5.93183	2.96591	0	0	0	1057.37		58.4	1902266368	2.68059	EIC (1057.48; 1058.50; 1059.49)±0.3 -All MS	131.5	8.04177	5.36118	2.68059	0	0	0	1057.38	58.05	1972442688	2.82325	0.01903	17.9971	0.201755	0.0714618
	H5N4F1S2b	5	4	1	2				20.0262	2369.85	1184.42	2369.82	1184.41	58.8	216341872	0.314132	EIC (1184.47; 1184.96; 1185.50)±0.3 -All MS	14.3	1.57066	1.25653	0.314132	0.628263	0	0	2369.76	1184.38	59.3	219058352	0.308687	EIC (1184.47; 1184.96; 1185.50)±0.3 -All MS	19.4	1.54344	1.23475	0.308687	0.617375	0	0	2369.79	59.05	217700112	0.311409	0.05923	24.9932	0.00384972	0.0123622
	H5N4S2d	5	4		2				20.0262	2223.79	1111.4	2223.72	1111.36	61.5	310397120	0.450701	EIC (1111.46; 1111.95; 1112.46)±0.3 -All MS	22.2	2.25351	1.80281	0	0.901403	0	0	2223.72	1111.36	61.9	230847936	0.325301	EIC (1111.46; 1111.95; 1112.46)±0.3 -All MS	15.1	1.6265	1.3012	0	0.650601	0	0	2223.72	61.7	270622528	0.388001	0.07133	32.0759	0.0886716	0.228535
	H4N3S1c	4	3		1				20.0262	1567.56	783.282	1567.52	783.26	61.8	146119744	0.212168	EIC (783.27; 783.75; 784.28)±0.3 -All MS	6.6	0.848672	0.636504	0	0.212168	0	0	1567.5	783.25	62.3	170040592	0.239614	EIC (783.27; 783.75; 784.28)±0.3 -All MS	7.8	0.958455	0.718841	0	0.239614	0	0	1567.51	62.05	158080168	0.225891	0.05373	34.2761	0.019407	0.0859131
	H4N3F1S1d	4	3	1	1				20.0262	1713.62	856.311	1713.6	856.3	67.5	199478144	0.289645	EIC (856.39; 856.90; 857.37)±0.3 -All MS	12.6	1.15858	0.868936	0.289645	0.289645	0	0	1713.56	856.28	67.8	218495984	0.307895	EIC (856.39; 856.90; 857.37)±0.3 -All MS	10.6	1.23158	0.923685	0.307895	0.307895	0	0	1713.58	67.65	208987064	0.29877	0.04163	24.2936	0.0129044	0.0431918
	H5N4F1S2e	5	4	1	2				20.0262	2369.85	1184.42	2369.76	1184.38	70.9	74989496	0.108886	EIC (1184.47; 1184.96; 1185.50)±0.3 -All MS	7.1	0.544429	0.435543	0.108886	0.217772	0	0	2369.76	1184.38	71.4	72757488	0.102527	EIC (1184.47; 1184.96; 1185.50)±0.3 -All MS	6.4	0.512633	0.410107	0.102527	0.205053	0	0	2369.76	71.15	73873492	0.105706	0.08923	37.6522	0.00449667	0.0425393
															68869810856	100			6.88236	2.28712	0.0911942	0.129458	0.022103	0.0768555				70964479136	100			6.90789	2.29256	0.0877591	0.131042	0.0181278	0.0888963

## Sheet: T.S2-4 DLD-1
Table S2-4. N-glycans present in DLD-1 cell line, retention times (min), peak areas, relative abundances with standard deviation and relative standard deviation (CV), and calculations of monosaccharide average compositions for each technical replicate. H = hexose; N = N-acetylhexosamine; F = deoxyhexose; S = N-acetylneuraminic acid; Su = Sulfate; P = Phosphate.
		162.053	203.079	146.058	291.095	79.9568	79.9663	-1.00727
Composition		H	N	F	S	Su	P	H+	Reduced Reducing end mass	Theoretical		Technical replicate 1													Technical replicate 2													Average
										[M-H]1-	[M-2H]2-	[M-H]1- obv.	[M-2H]2- obv.	RT (min)	Peak area	Rel. peak area (%)		S/N	H	N	F	S	Su	P	[M-H]1- obv.	[M-2H]2- obv.	RT (min)	Peak area	Rel. peak area (%)		S/N	H	N	F	S	Su	P	[M-H]1- obv	RT avg (min)	Peak area	Rel. peak area (%)	m/z error	ppm error	SD (%)	CV (%)
	H7N2P2	7	2				2		20.0262	1719.48	859.24	1719.46	859.23	29.4	950777856	1.56616	EIC (859.23; 859.72; 860.24)±0.3 -All MS	21.8	10.9631	3.13232	0	0	0	3.13232	1719.44	859.22	29.5	1300114048	2.12176	EIC (859.23; 859.72; 860.24)±0.3 -All MS	60.1	14.8523	4.24352	0	0	0	4.24352	1719.45	29.45	1125445952	1.84396	0.02993	17.4064	0.392868	0.213057
	H10N2P1	10	2				1		20.0262	2125.67	1062.34	2125.6	1062.3	34.6	206518816	0.340186	EIC (1062.38; 1062.87; 1063.30)±0.3 -All MS	14	3.40186	0.680373	0	0	0	0.340186	2125.6	1062.3	35	90846512	0.14826	EIC (1062.38; 1062.87; 1063.30)±0.3 -All MS	12	1.4826	0.296519	0	0	0	0.14826	2125.6	34.8	148682664	0.244223	0.07203	33.8858	0.135713	0.555692
	H6N2P1a	6	2				1		20.0262	1477.46	738.23	1477.44	738.22	35.2	571372928	0.941189	EIC (738.21; 738.73; 739.21; 1477.43; 1478.44; 1479.38)±0.3 -All MS	20.1	5.64714	1.88238	0	0	0	0.941189	1477.42	738.21	35.5	577795840	0.942951	EIC (738.21; 738.73; 739.21; 1477.43; 1478.44; 1479.38)±0.3 -All MS	28.2	5.65771	1.8859	0	0	0	0.942951	1477.43	35.35	574584384	0.94207	0.03083	20.8669	0.00124585	0.00132246
	H7N2P1	7	2				1		20.0262	1639.51	819.257	1639.48	819.24	35.2	1631837440	2.68803	EIC (819.24; 819.73; 820.24)±0.3 -All MS	59.4	18.8162	5.37606	0	0	0	2.68803	1639.46	819.23	35.5	1588732160	2.59278	EIC (819.24; 819.73; 820.24)±0.3 -All MS	74.2	18.1495	5.18556	0	0	0	2.59278	1639.47	35.35	1610284800	2.6404	0.04363	26.6116	0.0673531	0.0255086
	H8N2P1	8	2				1		20.0262	1801.57	900.283	1801.52	900.26	35.3	286558688	0.472031	EIC (900.25; 900.74; 901.25)±0.3 -All MS	17.9	3.77625	0.944063	0	0	0	0.472031	1801.5	900.25	35.8	295915584	0.482928	EIC (900.25; 900.74; 901.25)±0.3 -All MS	18.4	3.86343	0.965856	0	0	0	0.482928	1801.51	35.55	291237136	0.47748	0.05643	31.3227	0.00770525	0.0161373
	H7N3Su1	7	3			1			20.0262	1842.58	920.792	1842.58	920.79	36.4	158054496	0.260354	EIC (920.79; 921.32; 921.78)±0.3 -All MS	10.3	1.82248	0.781062	0	0	0.260354	0	1842.54	920.77	36.9	116482968	0.190098	EIC (920.79; 921.32; 921.78)±0.3 -All MS	8.8	1.33068	0.570294	0	0	0.190098	0	1842.56	36.65	137268732	0.225226	0.02353	12.7701	0.0496786	0.220572
	H6N3Su1b	6	3			1			20.0262	1680.53	839.765	1680.54	839.77	37	348420800	0.573933	EIC (839.77; 840.27; 840.79)±0.3 -All MS	18.9	3.4436	1.7218	0	0	0.573933	0	1680.5	839.75	37.5	315644544	0.515125	EIC (839.77; 840.27; 840.79)±0.3 -All MS	18.8	3.09075	1.54538	0	0	0.515125	0	1680.52	37.25	332032672	0.544529	0.01073	6.38489	0.0415833	0.0763656
	H8N3Su1	8	3			1			20.0262	2004.64	1001.82	2004.56	1001.78	37.4	446069024	0.734783	EIC (1001.79; 1002.30; 1002.80)±0.3 -All MS	20.4	5.87827	2.20435	0	0	0.734783	0	2004.56	1001.78	37.9	337405216	0.550638	EIC (1001.79; 1002.30; 1002.80)±0.3 -All MS	23.7	4.40511	1.65192	0	0	0.550638	0	2004.56	37.65	391737120	0.642711	0.07633	38.0767	0.13021	0.202595
	H6N2P1b	6	2				1		20.0262	1477.46	738.23	1477.44	738.22	38.1	1118991232	1.84325	EIC (738.21; 738.73; 739.21; 1477.43; 1478.44; 1479.38)±0.3 -All MS	43.2	11.0595	3.6865	0	0	0	1.84325	1477.42	738.21	38.5	1124494464	1.83515	EIC (738.21; 738.73; 739.21; 1477.43; 1478.44; 1479.38)±0.3 -All MS	57.7	11.0109	3.6703	0	0	0	1.83515	1477.43	38.3	1121742848	1.8392	0.03083	20.8669	0.00572519	0.00311287
	H8N2	8	2						20.0262	1721.6	860.3	1721.58	860.29	39.9	12431735808	20.4781	EIC (860.31; 860.81; 861.30)±0.3 -All MS	408.5	163.825	40.9561	0	0	0	0	1721.58	860.29	40.8	13492887552	22.0201	EIC (860.31; 860.81; 861.30)±0.3 -All MS	460.1	176.161	44.0402	0	0	0	0	1721.58	40.35	12962311680	21.2491	0.02013	11.6926	1.09039	0.0513148
	H7N2a	7	2						20.0262	1559.55	779.274	1559.54	779.27	39.9	3309132032	5.45094	EIC (779.33; 779.84; 780.33)±0.3 -All MS	129	38.1566	10.9019	0	0	0	0	1559.52	779.26	41	3459890176	5.64647	EIC (779.33; 779.84; 780.33)±0.3 -All MS	172.7	39.5253	11.2929	0	0	0	0	1559.53	40.45	3384511104	5.54871	0.01733	11.1122	0.138261	0.0249178
	H9N2	9	2						20.0262	1883.65	941.326	1883.64	941.32	40.6	11808965632	19.4522	EIC (941.31; 941.82; 942.31)±0.3 -All MS	448.7	175.07	38.9044	0	0	0	0	1883.6	941.3	41.4	11423924224	18.6436	EIC (941.31; 941.82; 942.31)±0.3 -All MS	578.3	167.793	37.2872	0	0	0	0	1883.62	41	11616444928	19.0479	0.03293	17.482	0.571771	0.0300175
	H7N2b	7	2						20.0262	1559.55	779.274	1559.52	779.26	41.7	1775108224	2.92403	EIC (779.33; 779.84; 780.33)±0.3 -All MS	52.3	20.4682	5.84806	0	0	0	0	1559.5	779.25	42.7	2050455808	3.3463	EIC (779.33; 779.84; 780.33)±0.3 -All MS	78	23.4241	6.6926	0	0	0	0	1559.51	42.2	1912782016	3.13517	0.03733	23.9364	0.29859	0.095239
	H6N2a	6	2						20.0262	1397.49	698.247	1397.48	698.24	42	5085355008	8.37681	EIC (698.28; 698.77; 699.27; 1397.56; 1398.53; 1399.52)±0.3 -All MS	132.1	50.2608	16.7536	0	0	0	0	1397.44	698.22	42.9	5869591552	9.57905	EIC (698.28; 698.77; 699.27; 1397.56; 1398.53; 1399.52)±0.3 -All MS	210.2	57.4743	19.1581	0	0	0	0	1397.46	42.45	5477473280	8.97793	0.03453	24.7085	0.850117	0.0946896
	H10N2	10	2						20.0262	2045.71	1022.35	2045.64	1022.32	42.7	997640128	1.64335	EIC (1022.42; 1022.91; 1023.46)±0.3 -All MS	44.8	16.4335	3.28671	0	0	0	0	2045.64	1022.32	43.5	1181384448	1.928	EIC (1022.42; 1022.91; 1023.46)±0.3 -All MS	99	19.28	3.85599	0	0	0	0	2045.64	43.1	1089512288	1.78567	0.06573	32.1307	0.201272	0.112715
	H6N2b	6	2						20.0262	1397.49	698.247	1397.44	698.22	44	392931968	0.647254	EIC (698.28; 698.77; 699.27; 1397.56; 1398.53; 1399.52)±0.3 -All MS	10.5	3.88352	1.29451	0	0	0	0	1397.46	698.23	44.9	402436032	0.656767	EIC (698.28; 698.77; 699.27; 1397.56; 1398.53; 1399.52)±0.3 -All MS	13.2	3.9406	1.31353	0	0	0	0	1397.45	44.45	397684000	0.652011	0.04453	31.8642	0.00672713	0.0103175
	H6N3S1a	6	3		1				20.0262	1891.67	945.335	1891.62	945.31	44.5	324971744	0.535307	EIC (945.38; 945.88; 946.34)±0.3 -All MS	15.7	3.21184	1.60592	0	0.535307	0	0	1891.6	945.3	45.1	277578208	0.453002	EIC (945.38; 945.88; 946.34)±0.3 -All MS	18.8	2.71801	1.35901	0	0.453002	0	0	1891.61	44.8	301274976	0.494154	0.05933	31.3638	0.0581984	0.117774
	H6N3	6	3						20.0262	1600.57	799.787	1600.54	799.77	45	3165189888	5.21383	EIC (799.77; 800.27; 800.77)±0.3 -All MS	127.4	31.283	15.6415	0	0	0	0	1600.54	799.77	46	3206980608	5.23373	EIC (799.77; 800.27; 800.77)±0.3 -All MS	125.6	31.4024	15.7012	0	0	0	0	1600.54	45.5	3186085248	5.22378	0.03393	21.1986	0.014068	0.00269307
	H7N3S1P1b	7	3		1		1		20.0262	2133.69	1066.34	2133.66	1066.33	45.4	556815488	0.91721	EIC (1066.32; 1066.84; 1067.31)±0.3 -All MS	35.6	6.42047	2.75163	0	0.91721	0	0.91721	2133.62	1066.31	45.6	508362560	0.829637	EIC (1066.32; 1066.84; 1067.31)±0.3 -All MS	57.2	5.80746	2.48891	0	0.829637	0	0.829637	2133.64	45.5	532589024	0.873423	0.04843	22.6978	0.0619229	0.0708968
	H4N2b	4	2						20.0262	1073.39		1073.36		45.3	269274752	0.443561	EIC (1073.46; 1074.46; 1075.46)±0.3 -All MS	21.5	1.77424	0.887121	0	0	0	0	1073.37		46.4	157811824	0.257546	EIC (1073.46; 1074.46; 1075.46)±0.3 -All MS	18.6	1.03018	0.515091	0	0	0	0	1073.36	45.85	213543288	0.350553	0.02393	22.2939	0.131532	0.375214
	H5N4S1a	5	4		1				20.0262	1932.7	965.848	1932.68	965.84	46.4	1074005376	1.76915	EIC (965.90; 966.39; 966.93)±0.3 -All MS	58.8	8.84573	7.07658	0	1.76915	0	0	1932.64	965.82	47.1	1034640192	1.68851	EIC (965.90; 966.39; 966.93)±0.3 -All MS	74.5	8.44256	6.75405	0	1.68851	0	0	1932.66	46.75	1054322784	1.72883	0.03593	18.5906	0.0570171	0.0329802
	H5N4c	5	4						20.0262	1641.6	820.3	1641.58	820.29	47.1	1543560832	2.54262	EIC (820.29; 820.79; 821.31; 1641.58; 1642.55; 1643.53)±0.3 -All MS	66.8	12.7131	10.1705	0	0	0	0	1641.56	820.28	48.2	1807962112	2.95056	EIC (820.29; 820.79; 821.31; 1641.58; 1642.55; 1643.53)±0.3 -All MS	99.9	14.7528	11.8022	0	0	0	0	1641.57	47.65	1675761472	2.74659	0.03053	18.5977	0.288457	0.105024
	H3N2	3	2						20.0262	911.336		911.33		48.4	835919232	1.37696	EIC (911.39; 912.39; 913.43)±0.3 -All MS	36.5	4.13088	2.75392	0	0	0	0	911.32		49.3	865145856	1.4119	EIC (911.39; 912.39; 913.43)±0.3 -All MS	49.6	4.2357	2.8238	0	0	0	0	911.325	48.85	850532544	1.39443	0.01113	12.2128	0.0247061	0.0177177
	H5N2b	5	2						20.0262	1235.44		1235.43		50.3	2091298944	3.44487	EIC (1235.42; 1236.43; 1237.41)±0.3 -All MS	130.9	17.2244	6.88975	0	0	0	0	1235.4		51.2	1448233344	2.36349	EIC (1235.42; 1236.43; 1237.41)±0.3 -All MS	100.1	11.8174	4.72697	0	0	0	0	1235.41	50.75	1769766144	2.90418	0.02673	21.636	0.764656	0.263295
	H5N3S1b	5	3		1				20.0262	1729.62	864.308	1729.58	864.29	51.1	1039186496	1.71179	EIC (864.31; 864.81; 865.28)±0.3 -All MS	39.9	8.55896	5.13537	0	1.71179	0	0	1729.56	864.28	51.7	870108032	1.42	EIC (864.31; 864.81; 865.28)±0.3 -All MS	55.5	7.09999	4.26	0	1.42	0	0	1729.57	51.4	954647264	1.56589	0.04653	26.9019	0.206328	0.131764
	H5N4Su2	5	4			2			20.0262	1801.51	900.257	1801.48	900.24	51.2	150558880	0.248007	EIC (900.25; 900.74; 901.25)±0.3 -All MS	11.1	1.24003	0.992027	0	0	0.496014	0	1801.52	900.26	51.7	150252384	0.245209	EIC (900.25; 900.74; 901.25)±0.3 -All MS	7.6	1.22604	0.980835	0	0	0.490418	0	1801.5	51.45	150405632	0.246608	0.01413	7.8434	0.00197848	0.00802278
	H4N3S1b	4	3		1				20.0262	1567.56	783.282	1567.56	783.28	52.4	250487296	0.412613	EIC (783.27; 783.79; 784.31)±0.3 -All MS	11	1.65045	1.23784	0	0.412613	0	0	1567.56	783.28	52.9	232876288	0.380049	EIC (783.27; 783.79; 784.31)±0.3 -All MS	14.8	1.5202	1.14015	0	0.380049	0	0	1567.56	52.65	241681792	0.396331	0.00373	2.37949	0.023026	0.0580979
	H6N3S1b	6	3		1				20.0262	1891.67	945.335	1891.64	945.32	53.4	1405605760	2.31537	EIC (945.38; 945.88; 946.34)±0.3 -All MS	73.6	13.8922	6.94612	0	2.31537	0	0	1891.6	945.3	53.9	1252063360	2.04334	EIC (945.38; 945.88; 946.34)±0.3 -All MS	80	12.2601	6.13003	0	2.04334	0	0	1891.62	53.65	1328834560	2.17936	0.04933	26.0775	0.192354	0.088262
	H5N4S2b	5	4		2				20.0262	2223.79	1111.4	2223.76	1111.38	54.3	375922048	0.619234	EIC (1111.46; 1111.95; 1112.46)±0.3 -All MS	20.8	3.09617	2.47694	0	1.23847	0	0	2223.66	1111.33	54.8	286355712	0.467327	EIC (1111.46; 1111.95; 1112.46)±0.3 -All MS	21.4	2.33663	1.86931	0	0.934653	0	0	2223.71	54.55	331138880	0.543281	0.08133	36.5727	0.107415	0.197715
	H6N5b	6	5						20.0262	2006.73	1002.87	2006.66	1002.83	54	495505024	0.816216	EIC (1002.83; 1003.33; 1003.83)±0.3 -All MS	23.4	4.8973	4.08108	0	0	0	0	2006.68	1002.84	55.1	445518592	0.727077	EIC (1002.83; 1003.33; 1003.83)±0.3 -All MS	27.4	4.36246	3.63539	0	0	0	0	2006.67	54.55	470511808	0.771647	0.06273	31.2598	0.0630309	0.0816836
	H4N3	4	3						20.0262	1276.47		1276.46		53.9	163080528	0.268633	EIC (1276.48; 1277.47; 1278.44)±0.3 -All MS	16.7	1.07453	0.805899	0	0	0	0	1276.38		55.1	99022616	0.161603	EIC (1276.48; 1277.47; 1278.44)±0.3 -All MS	13	0.646412	0.484809	0	0	0	0	1276.42	54.5	131051572	0.215118	0.04833	37.8623	0.0756817	0.351815
	H5N4S1b	5	4		1				20.0262	1932.7	965.848	1932.64	965.82	55.3	1398854912	2.30425	EIC (965.90; 966.39; 966.93)±0.3 -All MS	54.8	11.5213	9.21701	0	2.30425	0	0	1932.66	965.83	56.1	1758655744	2.87009	EIC (965.90; 966.39; 966.93)±0.3 -All MS	95.5	14.3505	11.4804	0	2.87009	0	0	1932.65	55.7	1578755328	2.58717	0.04593	23.7647	0.400108	0.154651
	H5N4S1Su1	5	4		1	1			20.0262	2012.65	1005.83	2012.62	1005.81	57.2	557885376	0.918972	EIC (1005.80; 1006.32; 1006.81)±0.3 -All MS	22.8	4.59486	3.67589	0	0.918972	0.918972	0	2012.58	1005.79	57.4	522987840	0.853506	EIC (1005.80; 1006.32; 1006.81)±0.3 -All MS	31.3	4.26753	3.41402	0	0.853506	0.853506	0	2012.6	57.3	540436608	0.886239	0.05273	26.1993	0.0462917	0.0522339
	H6N5S1c	6	5		1				20.0262	2297.83	1148.41	2297.78	1148.39	57.3	154610624	0.254681	EIC (1148.37; 1148.87; 1149.36)±0.3 -All MS	8.2	1.52809	1.27341	0	0.254681	0	0	2297.76	1148.38	58.1	121397632	0.198118	EIC (1148.37; 1148.87; 1149.36)±0.3 -All MS	7.9	1.18871	0.990592	0	0.198118	0	0	2297.77	57.7	138004128	0.2264	0.05813	25.2978	0.0399958	0.17666
	H6N5S2b	6	5		2				20.0262	2588.92	1293.96	2588.82	1293.91	58.6	242232064	0.399015	EIC (1293.90; 1294.40; 1294.90)±0.3 -All MS	20.8	2.39409	1.99507	0	0.798029	0	0	2588.76	1293.88	58.8	143652000	0.234437	EIC (1293.90; 1294.40; 1294.90)±0.3 -All MS	14.4	1.40662	1.17219	0	0.468874	0	0	2588.79	58.7	192942032	0.316726	0.13353	51.5774	0.116374	0.367428
	H6N5c	6	5						20.0262	2006.73	1002.87	2006.66	1002.83	58.1	170836720	0.281409	EIC (1002.83; 1003.33; 1003.83)±0.3 -All MS	6.6	1.68846	1.40705	0	0	0	0	2006.7	1002.85	59.2	135051312	0.220401	EIC (1002.83; 1003.33; 1003.83)±0.3 -All MS	7.5	1.32241	1.10201	0	0	0	0	2006.68	58.65	152944016	0.250905	0.05273	26.2765	0.0431394	0.171935
	H5N4S2d	5	4		2				20.0262	2223.79	1111.4	2223.72	1111.36	61.5	2650477824	4.36598	EIC (1111.46; 1111.95; 1112.46)±0.3 -All MS	154	21.8299	17.4639	0	8.73195	0	0	2223.72	1111.36	61.8	2024413312	3.3038	EIC (1111.46; 1111.95; 1112.46)±0.3 -All MS	158.2	16.519	13.2152	0	6.6076	0	0	2223.72	61.65	2337445568	3.83489	0.07133	32.0759	0.751072	0.195852
	H4N3S1c	4	3		1				20.0262	1567.56	783.282	1567.5	783.25	61.5	271802016	0.447724	EIC (783.27; 783.79; 784.31)±0.3 -All MS	12	1.79089	1.34317	0	0.447724	0	0	1567.52	783.26	62	298200064	0.486656	EIC (783.27; 783.79; 784.31)±0.3 -All MS	17.1	1.94663	1.45997	0	0.486656	0	0	1567.51	61.75	285001040	0.46719	0.05373	34.2761	0.0275297	0.0589262
															60707551904	100			6.98267	2.44182	0	0.223555	0.0298406	0.103342				61275270720	100			7.021	2.41162	0	0.19234	0.0259979	0.110752

## Sheet: T.S2-5 HCT15
Table S2-5. N-glycans present in HCT15 cell line, retention times (min), peak areas, relative abundances with standard deviation and relative standard deviation (CV), and calculations of monosaccharide average compositions for each technical replicate. H = hexose; N = N-acetylhexosamine; F = deoxyhexose; S = N-acetylneuraminic acid; Su = Sulfate; P = Phosphate.
		162.053	203.079	146.058	291.095	79.9568	79.9663	-1.00727
Composition		H	N	F	S	Su	P	H+	Reduced Reducing end mass	Theoretical		Technical replicate 1
										[M-H]1-	[M-2H]2-	[M-H]1- obv.	[M-2H]2- obv.	RT (min)	Peak area	Rel. peak area (%)		S/N	H	N	F	S	Su	P
	H7N2P2	7	2				2		20.0262	1719.48	859.24	1719.44	859.22	29.3	184700144	0.974381	EIC (859.23; 859.72; 860.24)±0.3 -All MS	9.7	6.82066	1.94876	0	0	0	1.94876
	H10N2P1	10	2				1		20.0262	2125.67	1062.34	2125.62	1062.31	34.7	93894592	0.495338	EIC (1062.38; 1062.87; 1063.30)±0.3 -All MS	10	4.95338	0.990677	0	0	0	0.495338
	H7N2P1	7	2				1		20.0262	1639.51	819.257	1639.46	819.23	35.3	547815168	2.88998	EIC (819.24; 819.73; 820.24)±0.3 -All MS	40.5	20.2299	5.77997	0	0	0	2.88998
	H6N2P1a	6	2				1		20.0262	1477.46	738.23	1477.46	738.23	35.3	170717824	0.900617	EIC (738.21; 738.73; 739.21)±0.3 -All MS	11.7	5.4037	1.80123	0	0	0	0.900617
	H8N2P1	8	2				1		20.0262	1801.57	900.283	1801.5	900.25	35.4	136403760	0.719594	EIC (900.24; 900.74; 901.25)±0.3 -All MS	10.9	5.75675	1.43919	0	0	0	0.719594
	H9N2P1	9	2				1		20.0262	1963.62	981.31	1963.58	981.29	35.8	58351572	0.307832	EIC (981.29; 981.78; 982.26)±0.3 -All MS	6.4	2.77049	0.615664	0	0	0	0.307832
	H6N3Su1b	6	3			1			20.0262	1680.53	839.765	1680.54	839.77	37.3	243115488	1.28255	EIC (839.77; 840.25; 840.80)±0.3 -All MS	19.3	7.69529	3.84765	0	0	1.28255	0
	H8N3Su1	8	3			1			20.0262	2004.64	1001.82	2004.58	1001.79	37.6	206016608	1.08683	EIC (1001.79; 1002.30; 1002.80)±0.3 -All MS	24.3	8.69468	3.2605	0	0	1.08683	0
	H6N2P1b	6	2				1		20.0262	1477.46	738.23	1477.44	738.22	38.3	127951256	0.675003	EIC (738.21; 738.73; 739.21)±0.3 -All MS	7.9	4.05002	1.35001	0	0	0	0.675003
	H8N2	8	2						20.0262	1721.6	860.3	1721.6	860.3	40.6	5335980544	28.1498	EIC (860.36; 860.87; 861.34)±0.3 -All MS	310.6	225.199	56.2996	0	0	0	0
	H7N2a	7	2						20.0262	1559.55	779.274	1559.52	779.26	40.6	1874777472	9.89034	EIC (779.33; 779.84; 780.33)±0.3 -All MS	125	69.2324	19.7807	0	0	0	0
	H9N2	9	2						20.0262	1883.65	941.326	1883.62	941.31	41.1	3970477568	20.9461	EIC (941.31; 941.82; 942.31)±0.3 -All MS	287.8	188.515	41.8923	0	0	0	0
	H7N2b	7	2						20.0262	1559.55	779.274	1559.5	779.25	42.3	652387968	3.44165	EIC (779.33; 779.84; 780.33)±0.3 -All MS	43.9	24.0916	6.88331	0	0	0	0
	H6N2a	6	2						20.0262	1397.49	698.247	1397.44	698.22	42.6	2957709824	15.6033	EIC (698.28; 698.77; 699.27; 1397.56; 1398.53; 1399.52)±0.3 -All MS	142.2	93.6199	31.2066	0	0	0	0
	H10N2	10	2						20.0262	2045.71	1022.35	2045.66	1022.33	43.2	379744128	2.00333	EIC (1022.42; 1022.91; 1023.46)±0.3 -All MS	35.8	20.0333	4.00666	0	0	0	0
	H6N2F1P1	6	2	1			1		20.0262	1623.52	811.259	1623.5	811.25	45.2	110431064	0.582576	EIC (811.24; 811.73; 812.25)±0.3 -All MS	8.4	3.49546	1.16515	0.582576	0	0	0.582576
	H6N3	6	3						20.0262	1600.57	799.787	1600.56	799.78	45.5	166261312	0.877107	EIC (799.77; 800.29; 800.77)±0.3 -All MS	10.5	5.26264	2.63132	0	0	0	0
	H4N2b	4	2						20.0262	1073.39		1073.4		46.2	64020816	0.33774	EIC (1073.46; 1074.46; 1075.46)±0.3 -All MS	8.5	1.35096	0.67548	0	0	0	0
	H5N4S2a	5	4		2				20.0262	2223.79	1111.4	2223.7	1111.35	46.2	114185144	0.602381	EIC (1111.46; 1111.95; 1112.46)±0.3 -All MS	14.7	3.0119	2.40952	0	1.20476	0	0
	H3N2	3	2						20.0262	911.336		911.36		49.1	112526936	0.593633	EIC (911.39; 912.39; 913.43)±0.3 -All MS	9.7	1.7809	1.18727	0	0	0	0
	H3N4F1b	3	4	1					20.0262	1463.55	731.276	1463.48	731.24	49.5	111796120	0.589777	EIC (731.32; 731.83; 732.32)±0.3 -All MS	6.6	1.76933	2.35911	0.589777	0	0	0
	H6N3F1b	6	3	1					20.0262	1746.63	872.816	1746.64	872.82	50.9	93474120	0.49312	EIC (872.82; 873.32; 873.81)±0.3 -All MS	8.4	2.95872	1.47936	0.49312	0	0	0
	H5N2b	5	2						20.0262	1235.44		1235.42		51	371048672	1.95746	EIC (1235.42; 1236.43; 1237.41)±0.3 -All MS	84.1	9.78729	3.91491	0	0	0	0
	H2N2F1	2	2	1					20.0262	895.341		895.34		51.1	164461840	0.867614	EIC (895.44; 896.45; 897.43)±0.3 -All MS	10.2	1.73523	1.73523	0.867614	0	0	0
	H5N4S2b	5	4		2				20.0262	2223.79	1111.4	2223.7	1111.35	54.6	113000520	0.596131	EIC (1111.46; 1111.95; 1112.46)±0.3 -All MS	12.6	2.98066	2.38452	0	1.19226	0	0
	H3N2F1	3	2	1					20.0262	1057.39		1057.38		57.9	476635008	2.51447	EIC (1057.48; 1058.50; 1059.49)±0.3 -All MS	51.2	7.54342	5.02895	2.51447	0	0	0
	H5N4F1S2d	5	4	1	2				20.0262	2369.85	1184.42	2369.84	1184.42	65.9	36516892	0.192644	EIC (1184.47; 1184.96; 1185.50)±0.3 -All MS	7.6	0.963219	0.770575	0.192644	0.385288	0	0
	H4N3F1S1d	4	3	1	1				20.0262	1713.62	856.311	1713.58	856.29	67.4	81245784	0.42861	EIC (856.39; 856.90; 857.37)±0.3 -All MS	6.4	1.71444	1.28583	0.42861	0.42861	0	0
															18955648144	100			7.3142	2.0813	0.0566882	0.0321092	0.0236938	0.0851971

## Sheet: T.S2-6 HCT116
Table S2-6. N-glycans present in HCT116 cell line, retention times (min), peak areas, relative abundances with standard deviation and relative standard deviation (CV), and calculations of monosaccharide average compositions for each technical replicate. H = hexose; N = N-acetylhexosamine; F = deoxyhexose; S = N-acetylneuraminic acid; Su = Sulfate; P = Phosphate.
		162.053	203.079	146.058	291.095	79.9568	79.9663	-1.00727
Composition		H	N	F	S	Su	P	H+	Reduced Reducing end mass	Theoretical		Biological replicate 1													Biological replicate 2													Biological replicate 3
										[M-H]1-	[M-2H]2-	[M-H]1- obv.	[M-2H]2- obv.	RT (min)	Peak area	Rel. peak area (%)		S/N	H	N	F	S	Su	P	[M-H]1- obv.	[M-2H]2- obv.	RT (min)	Peak area	Rel. peak area (%)		S/N	H	N	F	S	Su	P	[M-H]1- obv.	[M-2H]2- obv.	RT (min)	Peak area	Rel. peak area (%)		S/N	H	N	F	S	Su
	H7N2P2	7	2				2		20.0262	1719.48	859.24	1719.44	859.22	29.4	1130931456	2.21543	EIC (859.23; 859.72; 860.24)±0.3 -All MS	47.6	15.508	4.43087	0	0	0	4.43087	1719.44	859.22	29.2	964693696	2.12475	EIC (859.23; 859.72; 860.24)±0.3 -All MS	55.4	14.8732	4.24949	0	0	0	4.24949	1719.44	859.22	29.4	614841344	2.26136	EIC (859.23; 859.72; 860.24)±0.3 -All MS	40.2	15.8295	4.52272	0	0	0
	H10N2P1	10	2				1		20.0262	2125.67	1062.34	2125.56	1062.28	35.1	115564352	0.226384	EIC (1062.38; 1062.87; 1063.30)±0.3 -All MS	11.8	2.26384	0.452769	0	0	0	0.226384	2125.62	1062.31	34.8	62288572	0.137191	EIC (1062.38; 1062.87; 1063.30)±0.3 -All MS	7.3	1.37191	0.274382	0	0	0	0.137191	2125.56	1062.28	35.2	51866232	0.190762	EIC (1062.38; 1062.87; 1063.30)±0.3 -All MS	6.6	1.90762	0.381524	0	0	0
	H7N2P1	7	2				1		20.0262	1639.51	819.257	1639.48	819.24	35.3	1309379840	2.56501	EIC (819.24; 819.73; 820.24)±0.3 -All MS	61.7	17.955	5.13001	0	0	0	2.56501	1639.46	819.23	35.3	1215548672	2.67726	EIC (819.24; 819.73; 820.24)±0.3 -All MS	58.3	18.7408	5.35451	0	0	0	2.67726	1639.46	819.23	35.6	639870656	2.35342	EIC (819.24; 819.73; 820.24)±0.3 -All MS	40.4	16.4739	4.70684	0	0	0
	H6N2P1a	6	2				1		20.0262	1477.46	738.23	1477.42	738.21	35.4	474836096	0.930179	EIC (738.21; 738.73; 739.21; 1477.45; 1478.45; 1479.38)±0.3 -All MS	19.4	5.58107	1.86036	0	0	0	0.930179	1477.42	738.21	35.4	330100832	0.72705	EIC (738.21; 738.73; 739.21; 1477.45; 1478.45; 1479.38)±0.3 -All MS	18	4.3623	1.4541	0	0	0	0.72705	1477.4	738.2	35.6	182247552	0.670299	EIC (738.21; 738.73; 739.21; 1477.45; 1478.45; 1479.38)±0.3 -All MS	11.1	4.02179	1.3406	0	0	0
	H8N2P1	8	2				1		20.0262	1801.57	900.283	1801.48	900.24	35.6	133606592	0.261728	EIC (900.28; 900.77; 901.32)±0.3 -All MS	7.6	2.09383	0.523456	0	0	0	0.261728	1801.5	900.25	35.6	114710560	0.252651	EIC (900.28; 900.77; 901.32)±0.3 -All MS	8.4	2.02121	0.505302	0	0	0	0.252651	1801.56	900.28	35.7	68867504	0.253292	EIC (900.28; 900.77; 901.32)±0.3 -All MS	9.6	2.02634	0.506584	0	0	0
	H6N3Su1b	6	3			1			20.0262	1680.53	839.765	1680.48	839.74	37.4	207498240	0.406478	EIC (839.77; 840.25; 840.80)±0.3 -All MS	12	2.43887	1.21943	0	0	0.406478	0	1680.5	839.75	37.4	139689936	0.307668	EIC (839.77; 840.25; 840.80)±0.3 -All MS	8.9	1.84601	0.923004	0	0	0.307668	0	1680.52	839.76	37.6	121866544	0.44822	EIC (839.77; 840.25; 840.80)±0.3 -All MS	10.4	2.68932	1.34466	0	0	0.44822
	H8N3Su1	8	3			1			20.0262	2004.64	1001.82	2004.54	1001.77	37.8	114898568	0.22508	EIC (1001.79; 1002.30; 1002.80)±0.3 -All MS	10.1	1.80064	0.675241	0	0	0.22508	0	2004.58	1001.79	38.2	115501928	0.254394	EIC (1001.79; 1002.30; 1002.80)±0.3 -All MS	9.6	2.03515	0.763182	0	0	0.254394	0	2004.52	1001.76	37.9	81504504	0.29977	EIC (1001.79; 1002.30; 1002.80)±0.3 -All MS	10.2	2.39816	0.899311	0	0	0.29977
	H7N3S1P1a	7	3		1		1		20.0262	2133.69	1066.34	2133.64	1066.32	37.3	221514096	0.433934	EIC (1066.35; 1066.84; 1067.35)±0.3 -All MS	19.2	3.03754	1.3018	0	0.433934	0	0.433934	2133.62	1066.31	37.1	185636880	0.408867	EIC (1066.35; 1066.84; 1067.35)±0.3 -All MS	18	2.86207	1.2266	0	0.408867	0	0.408867	2133.6	1066.3	37.2	103899720	0.382139	EIC (1066.35; 1066.84; 1067.35)±0.3 -All MS	14.2	2.67497	1.14642	0	0.382139	0
	H6N2P1b	6	2				1		20.0262	1477.46	738.23	1477.42	738.21	38.4	551230656	1.07983	EIC (738.21; 738.73; 739.21; 1477.45; 1478.45; 1479.38)±0.3 -All MS	23.9	6.47899	2.15966	0	0	0	1.07983	1477.4	738.2	38.2	516690304	1.13801	EIC (738.21; 738.73; 739.21; 1477.45; 1478.45; 1479.38)±0.3 -All MS	24.6	6.82809	2.27603	0	0	0	1.13801	1477.4	738.2	38.4	271454080	0.998397	EIC (738.21; 738.73; 739.21; 1477.45; 1478.45; 1479.38)±0.3 -All MS	13.9	5.99038	1.99679	0	0	0
	H8N2	8	2						20.0262	1721.6	860.3	1721.58	860.29	40.8	9618816000	18.8428	EIC (860.36; 860.87; 861.34)±0.3 -All MS	417	150.742	37.6855	0	0	0	0	1721.58	860.29	40.8	8037421568	17.7025	EIC (860.36; 860.87; 861.34)±0.3 -All MS	449.3	141.62	35.405	0	0	0	0	1721.58	860.29	41.2	6346763776	23.3431	EIC (860.36; 860.87; 861.34)±0.3 -All MS	407.1	186.745	46.6863	0	0	0
	H7N2a	7	2						20.0262	1559.55	779.274	1559.52	779.26	40.6	2368005376	4.6388	EIC (779.33; 779.84; 780.33)±0.3 -All MS	146.3	32.4716	9.27759	0	0	0	0	1559.54	779.27	40.7	2644156416	5.82377	EIC (779.33; 779.84; 780.33)±0.3 -All MS	155.5	40.7664	11.6475	0	0	0	0	1559.54	779.27	41	1676426624	6.16583	EIC (779.33; 779.84; 780.33)±0.3 -All MS	112.3	43.1608	12.3317	0	0	0
	H9N2	9	2						20.0262	1883.65	941.326	1883.6	941.3	41.3	8928375808	17.4902	EIC (941.31; 941.82; 942.31)±0.3 -All MS	436.2	157.412	34.9804	0	0	0	0	1883.62	941.31	41.2	7541390336	16.61	EIC (941.31; 941.82; 942.31)±0.3 -All MS	494.8	149.49	33.2199	0	0	0	0	1883.64	941.32	41.6	5471339008	20.1234	EIC (941.31; 941.82; 942.31)±0.3 -All MS	395.8	181.11	40.2467	0	0	0
	H5N3S1a	5	3		1				20.0262	1729.62	864.308	1729.58	864.29	41.8	866638336	1.6977	EIC (864.30; 864.79; 865.29)±0.3 -All MS	57.8	8.48849	5.0931	0	1.6977	0	0	1729.58	864.29	41.6	952596736	2.0981	EIC (864.30; 864.79; 865.29)±0.3 -All MS	61.9	10.4905	6.2943	0	2.0981	0	0	1729.56	864.28	41.8	452326304	1.66364	EIC (864.30; 864.79; 865.29)±0.3 -All MS	36.6	8.31819	4.99091	0	1.66364	0
	H7N2b	7	2						20.0262	1559.55	779.274	1559.5	779.25	42.5	765081216	1.49875	EIC (779.33; 779.84; 780.33)±0.3 -All MS	43.1	10.4913	2.99751	0	0	0	0	1559.5	779.25	42.6	892976448	1.96679	EIC (779.33; 779.84; 780.33)±0.3 -All MS	49.8	13.7675	3.93357	0	0	0	0	1559.5	779.25	43	531438240	1.95461	EIC (779.33; 779.84; 780.33)±0.3 -All MS	29.5	13.6823	3.90922	0	0	0
	H6N2a	6	2						20.0262	1397.49	698.247	1397.48	698.24	42.7	4138989824	8.10806	EIC (698.28; 698.77; 699.27; 1397.56; 1398.53; 1399.52)±0.3 -All MS	120.8	48.6484	16.2161	0	0	0	0	1397.48	698.24	42.7	3419021056	7.53042	EIC (698.28; 698.77; 699.27; 1397.56; 1398.53; 1399.52)±0.3 -All MS	135.4	45.1825	15.0608	0	0	0	0	1397.44	698.22	43	2440332544	8.97544	EIC (698.28; 698.77; 699.27; 1397.56; 1398.53; 1399.52)±0.3 -All MS	107.4	53.8527	17.9509	0	0	0
	H10N2	10	2						20.0262	2045.71	1022.35	2045.66	1022.33	43.3	395798560	0.775348	EIC (1022.42; 1022.91; 1023.46)±0.3 -All MS	33.5	7.75348	1.5507	0	0	0	0	2045.64	1022.32	43.3	307612320	0.677518	EIC (1022.42; 1022.91; 1023.46)±0.3 -All MS	35.6	6.77518	1.35504	0	0	0	0	2045.62	1022.31	43.9	101877744	0.374702	EIC (1022.42; 1022.91; 1023.46)±0.3 -All MS	19.7	3.74702	0.749404	0	0	0
	H4N3S1a	4	3		1				20.0262	1567.56	783.282	1567.52	783.26	43.5	1079208960	2.11411	EIC (783.26; 783.76; 784.28)±0.3 -All MS	53.8	8.45645	6.34234	0	2.11411	0	0	1567.52	783.26	43.4	879298304	1.93666	EIC (783.26; 783.76; 784.28)±0.3 -All MS	51.8	7.74665	5.80998	0	1.93666	0	0	1567.52	783.26	43.7	430476256	1.58327	EIC (783.26; 783.76; 784.28)±0.3 -All MS	31.2	6.3331	4.74982	0	1.58327	0
	H4N4S1	4	4		1				20.0262	1770.64	884.822	1770.62	884.81	45	362028832	0.709195	EIC (884.82; 885.28; 885.84)±0.3 -All MS	25.4	2.83678	2.83678	0	0.709195	0	0	1770.62	884.81	44.8	295267360	0.650329	EIC (884.82; 885.28; 885.84)±0.3 -All MS	18.6	2.60131	2.60131	0	0.650329	0	0	1770.6	884.8	45	162552576	0.597862	EIC (884.82; 885.28; 885.84)±0.3 -All MS	11.9	2.39145	2.39145	0	0.597862	0
	H6N3S1a	6	3		1				20.0262	1891.67	945.335	1891.64	945.32	45	1138133504	2.22954	EIC (945.38; 945.88; 946.34)±0.3 -All MS	62.8	13.3773	6.68863	0	2.22954	0	0	1891.64	945.32	45	1007787712	2.21966	EIC (945.38; 945.88; 946.34)±0.3 -All MS	65	13.318	6.65898	0	2.21966	0	0	1891.62	945.31	45	432046688	1.58905	EIC (945.38; 945.88; 946.34)±0.3 -All MS	37.3	9.5343	4.76715	0	1.58905	0
	H6N3	6	3						20.0262	1600.57	799.787	1600.52	799.76	45.7	941426304	1.8442	EIC (799.77; 800.29; 800.77)±0.3 -All MS	54.3	11.0652	5.53261	0	0	0	0	1600.54	799.77	45.8	979281024	2.15687	EIC (799.77; 800.29; 800.77)±0.3 -All MS	75	12.9412	6.47062	0	0	0	0	1600.52	799.76	46	411205440	1.5124	EIC (799.77; 800.29; 800.77)±0.3 -All MS	32.7	9.07438	4.53719	0	0	0
	H4N5S1a	4	5		1				20.0262	1973.72	986.361	1973.68	986.34	45.5	430526912	0.843379	EIC (986.34; 986.82; 987.36)±0.3 -All MS	33.4	3.37352	4.2169	0	0.843379	0	0	1973.64	986.32	45.4	320093056	0.705007	EIC (986.34; 986.82; 987.36)±0.3 -All MS	29.2	2.82003	3.52504	0	0.705007	0	0	1973.64	986.32	45.6	184596640	0.678939	EIC (986.34; 986.82; 987.36)±0.3 -All MS	22.2	2.71576	3.3947	0	0.678939	0
	H5N4S2a	5	4		2				20.0262	2223.79	1111.4	2223.72	1111.36	46.3	490672992	0.961202	EIC (1111.46; 1111.95; 1112.46)±0.3 -All MS	38.2	4.80601	3.84481	0	1.9224	0	0	2223.7	1111.35	46.3	558221632	1.22949	EIC (1111.46; 1111.95; 1112.46)±0.3 -All MS	55.4	6.14744	4.91795	0	2.45897	0	0	2223.74	1111.37	46.4	262698240	0.966194	EIC (1111.46; 1111.95; 1112.46)±0.3 -All MS	39.2	4.83097	3.86477	0	1.93239	0
	H5N4S1a	5	4		1				20.0262	1932.7	965.848	1932.66	965.83	47	7647277568	14.9806	EIC (965.90; 966.39; 966.93)±0.3 -All MS	393.8	74.9031	59.9224	0	14.9806	0	0	1932.66	965.83	46.9	7563935744	16.6596	EIC (965.90; 966.39; 966.93)±0.3 -All MS	516.6	83.2981	66.6385	0	16.6596	0	0	1932.64	965.82	47.1	3119712768	11.4742	EIC (965.90; 966.39; 966.93)±0.3 -All MS	242.6	57.3709	45.8967	0	11.4742	0
	H5N4c	5	4						20.0262	1641.6	820.3	1641.56	820.28	48.1	805731200	1.57838	EIC (820.28; 820.79; 821.24)±0.3 -All MS	41	7.89192	6.31354	0	0	0	0	1641.58	820.29	47.9	804102208	1.77104	EIC (820.28; 820.79; 821.24)±0.3 -All MS	38.4	8.85521	7.08417	0	0	0	0	1641.58	820.29	48.3	401306368	1.47599	EIC (820.28; 820.79; 821.24)±0.3 -All MS	25.3	7.37994	5.90395	0	0	0
	H4N5S1b	4	5		1				20.0262	1973.72	986.361	1973.68	986.34	48.3	204106288	0.399833	EIC (986.34; 986.82; 987.36)±0.3 -All MS	12.8	1.59933	1.99917	0	0.399833	0	0	1973.66	986.33	48.5	172169456	0.379205	EIC (986.34; 986.82; 987.36)±0.3 -All MS	12.4	1.51682	1.89602	0	0.379205	0	0	1973.66	986.33	48.7	118712848	0.436621	EIC (986.34; 986.82; 987.36)±0.3 -All MS	13.1	1.74648	2.18311	0	0.436621	0
	H3N2	3	2						20.0262	911.336		911.34		49.2	443679616	0.869145	EIC (911.39; 912.39; 913.43)±0.3 -All MS	26.3	2.60743	1.73829	0	0	0	0	911.32		49.2	374956480	0.825845	EIC (911.39; 912.39; 913.43)±0.3 -All MS	21.7	2.47753	1.65169	0	0	0	0	911.35		49.2	179222032	0.659171	EIC (911.39; 912.39; 913.43)±0.3 -All MS	12.5	1.97751	1.31834	0	0	0
	H6N5S1a	6	5		1				20.0262	2297.83	1148.41	2297.76	1148.38	48.9	270314560	0.529532	EIC (1148.39; 1148.88; 1149.40)±0.3 -All MS	20.2	3.17719	2.64766	0	0.529532	0	0	2297.76	1148.38	48.6	331174720	0.729415	EIC (1148.39; 1148.88; 1149.40)±0.3 -All MS	27.9	4.37649	3.64707	0	0.729415	0	0	2297.78	1148.39	48.9	156670480	0.576228	EIC (1148.39; 1148.88; 1149.40)±0.3 -All MS	15.1	3.45737	2.88114	0	0.576228	0
	H6N5a	6	5						20.0262	2006.73	1002.87	2006.64	1002.82	50.6	125163576	0.245189	EIC (1002.86; 1003.33; 1003.89)±0.3 -All MS	8.4	1.47113	1.22594	0	0	0	0	2006.7	1002.85	50.4	178499344	0.393146	EIC (1002.86; 1003.33; 1003.89)±0.3 -All MS	16.3	2.35888	1.96573	0	0	0	0	2006.68	1002.84	50.9	68157264	0.25068	EIC (1002.86; 1003.33; 1003.89)±0.3 -All MS	6.4	1.50408	1.2534	0	0	0
	H5N2b	5	2						20.0262	1235.44		2471.84	1235.42	51	1135771392	2.22492	EIC (1235.42; 1236.43; 1237.41)±0.3 -All MS	112.4	11.1246	4.44983	0	0	0	0	1235.4		51.2	772525632	1.70149	EIC (1235.42; 1236.43; 1237.41)±0.3 -All MS	102.7	8.50747	3.40299	0	0	0	0	1235.41		51.4	488624896	1.79714	EIC (1235.42; 1236.43; 1237.41)±0.3 -All MS	69.1	8.98571	3.59429	0	0	0
	H5N3S1b	5	3		1				20.0262	1729.62	864.308	1729.56	864.28	51.6	343205312	0.672321	EIC (864.30; 864.79; 865.29)±0.3 -All MS	21.6	3.36161	2.01696	0	0.672321	0	0	1729.56	864.28	51.5	347099232	0.764489	EIC (864.30; 864.79; 865.29)±0.3 -All MS	19.1	3.82244	2.29347	0	0.764489	0	0	1729.54	864.27	51.9	165642496	0.609226	EIC (864.30; 864.79; 865.29)±0.3 -All MS	13.9	3.04613	1.82768	0	0.609226	0
	H4N3S1b	4	3		1				20.0262	1567.56	783.282	1567.54	783.27	52.7	201850432	0.395414	EIC (783.26; 783.76; 784.28)±0.3 -All MS	9.1	1.58166	1.18624	0	0.395414	0	0	1567.54	783.27	52.7	156214720	0.344064	EIC (783.26; 783.76; 784.28)±0.3 -All MS	11.7	1.37626	1.03219	0	0.344064	0	0	1567.5	783.25	53.2	92594480	0.340559	EIC (783.26; 783.76; 784.28)±0.3 -All MS	6.3	1.36224	1.02168	0	0.340559	0
	H6N5S1b	6	5		1				20.0262	2297.83	1148.41	2297.74	1148.37	52.9	257769936	0.504958	EIC (1148.39; 1148.88; 1149.40)±0.3 -All MS	19.1	3.02975	2.52479	0	0.504958	0	0	2297.74	1148.37	52.7	217077344	0.478115	EIC (1148.39; 1148.88; 1149.40)±0.3 -All MS	20.6	2.86869	2.39057	0	0.478115	0	0	2297.76	1148.38	53.2	94925200	0.349131	EIC (1148.39; 1148.88; 1149.40)±0.3 -All MS	12.9	2.09479	1.74566	0	0.349131	0
	H6N3S1b	6	3		1				20.0262	1891.67	945.335	1891.6	945.3	53.9	277413792	0.543439	EIC (945.38; 945.88; 946.34)±0.3 -All MS	18.1	3.26063	1.63032	0	0.543439	0	0	1891.62	945.31	53.9	187011600	0.411894	EIC (945.38; 945.88; 946.34)±0.3 -All MS	13.9	2.47137	1.23568	0	0.411894	0	0	1891.68	945.34	54.1	91848872	0.337816	EIC (945.38; 945.88; 946.34)±0.3 -All MS	8.9	2.0269	1.01345	0	0.337816	0
	H5N4S2b	5	4		2				20.0262	2223.79	1111.4	2223.74	1111.37	54.6	1791876736	3.51019	EIC (1111.46; 1111.95; 1112.46)±0.3 -All MS	140.4	17.551	14.0408	0	7.02038	0	0	2223.74	1111.37	54.6	1125815680	2.47962	EIC (1111.46; 1111.95; 1112.46)±0.3 -All MS	104.2	12.3981	9.91847	0	4.95924	0	0	2223.72	1111.36	54.8	478828800	1.76111	EIC (1111.46; 1111.95; 1112.46)±0.3 -All MS	55	8.80557	7.04445	0	3.52223	0
	H5N4S1b	5	4		1				20.0262	1932.7	965.848	1932.66	965.83	55.8	1219191680	2.38833	EIC (965.90; 966.39; 966.93)±0.3 -All MS	52.2	11.9417	9.55333	0	2.38833	0	0	1932.66	965.83	55.8	1270781952	2.79891	EIC (965.90; 966.39; 966.93)±0.3 -All MS	71	13.9945	11.1956	0	2.79891	0	0	1932.66	965.83	56	522316288	1.92106	EIC (965.90; 966.39; 966.93)±0.3 -All MS	38.9	9.60529	7.68423	0	1.92106	0
	H6N5S2a	6	5		2				20.0262	2588.92	1293.96	2588.82	1293.91	55.8	123415712	0.241765	EIC (1293.92; 1194.42; 1194.95)±0.3 -All MS	13.5	1.45059	1.20882	0	0.48353	0	0	2588.82	1293.91	55.9	80024336	0.176254	EIC (1293.92; 1194.42; 1194.95)±0.3 -All MS	12.2	1.05753	0.881271	0	0.352508	0	0	2588.8	1293.9	56	48175500	0.177188	EIC (1293.92; 1194.42; 1194.95)±0.3 -All MS	9.9	1.06313	0.885938	0	0.354375	0
	H5N4S2d	5	4		2				20.0262	2223.79	1111.4	2223.74	1111.37	61.7	417899968	0.818644	EIC (1111.46; 1111.95; 1112.46)±0.3 -All MS	31.6	4.09322	3.27458	0	1.63729	0	0	2223.72	1111.36	61.7	341419424	0.751979	EIC (1111.46; 1111.95; 1112.46)±0.3 -All MS	35.2	3.75989	3.00792	0	1.50396	0	0	2223.74	1111.37	61.9	121750584	0.447794	EIC (1111.46; 1111.95; 1112.46)±0.3 -All MS	15.9	2.23897	1.79117	0	0.895587	0
															51047830288	100			6.66125	2.68749	0	0.395059	0.00631558	0.0992793				45402793220	100												27188987092	100			6.92173	2.53461	0	0.292443	0.00747991
[truncated: 9 more columns]

## Sheet: T.S2-7 RKO-VUMC
Table S2-7. N-glycans present in RKO cell line, retention times (min), peak areas, relative abundances with standard deviation and relative standard deviation (CV), and calculations of monosaccharide average compositions for each technical replicate. H = hexose; N = N-acetylhexosamine; F = deoxyhexose; S = N-acetylneuraminic acid; Su = Sulfate; P = Phosphate.
		162.053	203.079	146.058	291.095	79.9568	79.9663	-1.00727
Composition		H	N	F	S	Su	P	H+	Reduced Reducing end mass	Theoretical		Technical replicate 1													Technical replicate 2													Average
										[M-H]1-	[M-2H]2-	[M-H]1- obv.	[M-2H]2- obv.	RT (min)	Peak area	Rel. peak area (%)		S/N	H	N	F	S	Su	P	[M-H]1- obv.	[M-2H]2- obv.	RT (min)	Peak area	Rel. peak area (%)		S/N	H	N	F	S	Su	P	[M-H]1- obv	RT avg (min)	Peak area	Rel. peak area (%)	m/z error	ppm error	SD (%)	CV (%)
	H7N2P2	7	2				2		20.0262	1719.48	859.24	1719.44	859.22	29.4	209288768	1.43783	EIC (859.23; 859.72; 860.24)±0.3 -All MS	8	10.0648	2.87566	0	0	0	2.87566	1719.44	859.22	29.4	416854144	2.92351	EIC (859.23; 859.72; 860.24)±0.3 -All MS	20.8	20.4646	5.84702	0	0	0	5.84702	1719.44	29.4	313071456	2.18067	0.03993	23.2221	1.05053	0.481748
	H7N2P1	7	2				1		20.0262	1639.51	819.257	1639.48	819.24	35	374660512	2.57395	EIC (819.24; 819.73; 820.24)±0.3 -All MS	18.5	18.0176	5.1479	0	0	0	2.57395	1639.48	819.24	35.3	504400544	3.5375	EIC (819.24; 819.73; 820.24)±0.3 -All MS	29.5	24.7625	7.07499	0	0	0	3.5375	1639.48	35.15	439530528	3.05572		0	0.68133	0.222969
	H6N2P1a	6	2				1		20.0262	1477.46	738.23	1477.42	738.21	35.4	164622400	1.13097	EIC (738.21; 738.73; 739.21; 1477.45; 1478.45; 1479.38)±0.3 -All MS	7.4	6.78582	2.26194	0	0	0	1.13097	1477.4	738.2	35.6	245672752	1.72297	EIC (738.21; 738.73; 739.21; 1477.45; 1478.45; 1479.38)±0.3 -All MS	14.3	10.3378	3.44594	0	0	0	1.72297	1477.41	35.5	205147576	1.42697		0	0.418607	0.293354
	H8N2P1	8	2				1		20.0262	1801.57	900.283	1801.5	900.25	35.5	109682400	0.753527	EIC (900.28; 900.77; 901.32)±0.3 -All MS	8.7	6.02822	1.50705	0	0	0	0.753527	1801.48	900.24	35.7	164323872	1.15245	EIC (900.28; 900.77; 901.32)±0.3 -All MS	12.7	9.21958	2.30489	0	0	0	1.15245	1801.49	35.6	137003136	0.952987		0	0.282079	0.295995
	H6N3Su1b	6	3			1			20.0262	1680.53	839.765	1680.5	839.75	37.1	115807472	0.795607	EIC (839.77; 840.25; 840.80)±0.3 -All MS	6.9	4.77364	2.38682	0	0	0.795607	0	1680.52	839.76	37.6	112198520	0.786878	EIC (839.77; 840.25; 840.80)±0.3 -All MS	8.3	4.72127	2.36064	0	0	0.786878	0	1680.51	37.35	114002996	0.791243		0	0.00617223	0.00780067
	H8N3Su1	8	3			1			20.0262	2004.64	1001.82	2004.58	1001.79	37.6	175589600	1.20632	EIC (1001.79; 1002.30; 1002.80)±0.3 -All MS	10.8	9.65052	3.61895	0	0	1.20632	0	2004.58	1001.79	38	106441600	0.746504	EIC (1001.79; 1002.30; 1002.80)±0.3 -All MS	11.9	5.97203	2.23951	0	0	0.746504	0	2004.58	37.8	141015600	0.976409		0	0.325136	0.332992
	H6N2P1b	6	2				1		20.0262	1477.46	738.23	1477.42	738.21	38	131140624	0.900947	EIC (738.21; 738.73; 739.21; 1477.45; 1478.45; 1479.38)±0.3 -All MS	7.7	5.40568	1.80189	0	0	0	0.900947	1477.4	738.2	38.4	243131168	1.70514	EIC (738.21; 738.73; 739.21; 1477.45; 1478.45; 1479.38)±0.3 -All MS	14	10.2309	3.41029	0	0	0	1.70514	1477.41	38.2	187135896	1.30305		0	0.568653	0.436403
	H8N2	8	2						20.0262	1721.6	860.3	1721.56	860.28	40.2	4009107200	27.5429	EIC (860.36; 860.87; 861.34)±0.3 -All MS	202	220.343	55.0858	0	0	0	0	1721.58	860.29	40.9	3486539776	24.452	EIC (860.36; 860.87; 861.34)±0.3 -All MS	213.4	195.616	48.9041	0	0	0	0	1721.57	40.55	3747823488	25.9975		0	2.18557	0.0840687
	H7N2a	7	2						20.0262	1559.55	779.274	1559.54	779.27	40.2	1300504576	8.93458	EIC (779.33; 779.84; 780.33)±0.3 -All MS	65.1	62.542	17.8692	0	0	0	0	1559.54	779.27	40.9	1497607808	10.5031	EIC (779.33; 779.84; 780.33)±0.3 -All MS	96.1	73.5219	21.0063	0	0	0	0	1559.54	40.55	1399056192	9.71885		0	1.10913	0.114122
	H9N2	9	2						20.0262	1883.65	941.326	1883.62	941.31	40.6	3741150976	25.702	EIC (941.31; 941.82; 942.31)±0.3 -All MS	173.1	231.318	51.4041	0	0	0	0	1883.62	941.31	41.6	2853163520	20.01	EIC (941.31; 941.82; 942.31)±0.3 -All MS	206	180.09	40.02	0	0	0	0	1883.62	41.1	3297157248	22.856		0	4.02487	0.176097
	H7N2b	7	2						20.0262	1559.55	779.274	1559.54	779.27	41.7	513988192	3.53114	EIC (779.33; 779.84; 780.33)±0.3 -All MS	22	24.718	7.06229	0	0	0	0	1559.5	779.25	42.7	550569216	3.86129	EIC (779.33; 779.84; 780.33)±0.3 -All MS	31.2	27.029	7.72258	0	0	0	0	1559.52	42.2	532278704	3.69622		0	0.233449	0.063159
	H6N2a	6	2						20.0262	1397.49	698.247	1397.46	698.23	42.1	1303629056	8.95604	EIC (698.28; 698.77; 699.27; 1397.56; 1398.53; 1399.52)±0.3 -All MS	45.9	53.7363	17.9121	0	0	0	0	1397.48	698.24	42.9	1508974976	10.5828	EIC (698.28; 698.77; 699.27; 1397.56; 1398.53; 1399.52)±0.3 -All MS	66.9	63.4971	21.1657	0	0	0	0	1397.47	42.5	1406302016	9.76944		0	1.15032	0.117747
	H9N2	9	2						20.0262	1883.65	941.326	1883.68	941.34	42.1	232876336	1.59988	EIC (941.31; 941.82; 942.31)±0.3 -All MS	12.9	14.3989	3.19976	0	0	0	0	1883.64	941.32	42.8	183810144	1.28911	EIC (941.31; 941.82; 942.31)±0.3 -All MS	19.5	11.602	2.57822	0	0	0	0	1883.66	42.45	208343240	1.4445		0	0.219748	0.152128
	H10N2	10	2						20.0262	2045.71	1022.35	2045.68	1022.34	42.7	429542048	2.95099	EIC (1022.42; 1022.91; 1023.46)±0.3 -All MS	33.2	29.5099	5.90198	0	0	0	0	2045.64	1022.32	43.5	416536608	2.92128	EIC (1022.42; 1022.91; 1023.46)±0.3 -All MS	43.1	29.2128	5.84257	0	0	0	0	2045.66	43.1	423039328	2.93614		0	0.0210063	0.0071544
	H6N3S1a	6	3		1				20.0262	1891.67	945.335	1891.62	945.31	44.6	119061504	0.817963	EIC (945.29; 945.80; 946.29)±0.3 -All MS	7.2	4.90778	2.45389	0	0.817963	0	0	1891.62	945.31	45.1	100860400	0.707361	EIC (945.29; 945.80; 946.29)±0.3 -All MS	8.1	4.24417	2.12208	0	0.707361	0	0	1891.62	44.85	109960952	0.762662		0	0.0782071	0.102545
	H6N2F1P1	6	2	1			1		20.0262	1623.52	811.259	1623.46	811.23	45.2	158368288	1.088	EIC (811.24; 811.73; 812.25)±0.3 -All MS	10.4	6.52802	2.17601	1.088	0	0	1.088	1623.44	811.22	45.3	144777504	1.01536	EIC (811.24; 811.73; 812.25)±0.3 -All MS	11.6	6.09218	2.03073	1.01536	0	0	1.01536	1623.45	45.25	151572896	1.05168		0	0.0513643	0.0488401
	H5N4S1a	5	4		1				20.0262	1932.7	965.848	1932.64	965.82	46.6	125348408	0.861154	EIC (965.90; 966.39; 966.93)±0.3 -All MS	9.9	4.30577	3.44462	0	0.861154	0	0	1932.74	965.87	47.1	112437488	0.788554	EIC (965.90; 966.39; 966.93)±0.3 -All MS	10.9	3.94277	3.15422	0	0.788554	0	0	1932.69	46.85	118892948	0.824854		0	0.0513359	0.0622363
	H5N3F1S1a	5	3	1	1				20.0262	1875.67	937.337	1875.6	937.3	47.1	92119400	0.632868	EIC (937.32; 937.81; 938.37)±0.3 -All MS	6.4	3.16434	1.8986	0.632868	0.632868	0	0	1875.64	937.32	47.6	96702504	0.678201	EIC (937.32; 937.81; 938.37)±0.3 -All MS	8.8	3.391	2.0346	0.678201	0.678201	0	0	1875.62	47.35	94410952	0.655534		0	0.0320549	0.0488989
	H4N3F1S1a	4	3	1	1				20.0262	1713.62	856.311	1713.58	856.29	49.2	128441344	0.882403	EIC (856.30; 856.79; 857.24)±0.3 -All MS	7.3	3.52961	2.64721	0.882403	0.882403	0	0	1713.6	856.3	49.8	164211904	1.15166	EIC (856.30; 856.79; 857.24)±0.3 -All MS	10.4	4.60665	3.45499	1.15166	1.15166	0	0	1713.59	49.5	146326624	1.01703		0	0.190395	0.187206
	H5N2b	5	2						20.0262	1235.44		1235.41		50.4	177585696	1.22003	EIC (1235.42; 1236.43; 1237.41)±0.3 -All MS	23.8	6.10014	2.44006	0	0	0	0	1235.41		51.2	162311808	1.13834	EIC (1235.42; 1236.43; 1237.41)±0.3 -All MS	30.6	5.69168	2.27667	0	0	0	0	1235.41	50.8	169948752	1.17918		0	0.0577654	0.0489876
	H2N2F1	2	2	1					20.0262	895.341		895.33		50.8	324928096	2.23228	EIC (895.44; 896.45; 897.43)±0.3 -All MS	16.3	4.46457	4.46457	2.23228	0	0	0	895.33		51.7	456246304	3.19978	EIC (895.44; 896.45; 897.43)±0.3 -All MS	35.4	6.39956	6.39956	3.19978	0	0	0	895.33	51.25	390587200	2.71603		0	0.684122	0.251883
	H5N4F1S1b	5	4	1	1				20.0262	2078.75	1038.88	2078.7	1038.85	52.1	237839296	1.63398	EIC (1038.86; 1039.37; 1039.87)±0.3 -All MS	16	8.16988	6.5359	1.63398	1.63398	0	0	2078.68	1038.84	52.4	228382160	1.60171	EIC (1038.86; 1039.37; 1039.87)±0.3 -All MS	22.2	8.00853	6.40682	1.60171	1.60171	0	0	2078.69	52.25	233110728	1.61784		0	0.0228189	0.0141045
	H3N2F1	3	2	1					20.0262	1057.39		1057.37		57.4	380578400	2.61461	EIC (1057.48; 1058.50; 1059.49)±0.3 -All MS	38.1	7.84382	5.22921	2.61461	0	0	0	1057.37		58.2	502532448	3.52439	EIC (1057.48; 1058.50; 1059.49)±0.3 -All MS	49.7	10.5732	7.04879	3.52439	0	0	0	1057.37	57.8	441555424	3.0695		0	0.643318	0.209584
															14555860592	100			7.46307	2.09325	0.0908414	0.0482836	0.0200192	0.0932306				14258687168	100			7.19227	2.08851	0.111711	0.0492748	0.0153338	0.149804

## Sheet: T.S2-8 SW48
Table S2-8. N-glycans present in SW48 cell line, retention times (min), peak areas, relative abundances with standard deviation and relative standard deviation (CV), and calculations of monosaccharide average compositions for each technical replicate. H = hexose; N = N-acetylhexosamine; F = deoxyhexose; S = N-acetylneuraminic acid; Su = Sulfate; P = Phosphate.
		162.053	203.079	146.058	291.095	79.9568	79.9663	-1.00727
Composition		H	N	F	S	Su	P	H+	Reduced Reducing end mass	Theoretical		Technical replicate 1
										[M-H]1-	[M-2H]2-	[M-H]1- obv.	[M-2H]2- obv.	RT (min)	Peak area	Rel. peak area (%)		S/N	H	N	F	S	Su	P
	H7N2P2	7	2				2		20.0262	1719.48	859.24	1719.44	859.22	29.4	498295456	0.894014	EIC (859.23; 859.72; 860.24)±0.3 -All MS	25.2	6.2581	1.78803	0	0	0	1.78803
	H5N2P1	5	2				1		20.0262	1315.41		1315.35		30.7	49764660	0.089285	EIC (1315.34; 1316.34; 1317.33)±0.3 -All MS	6.7	0.446425	0.17857	0	0	0	0.089285
	H10N2P1	10	2				1		20.0262	2125.67	1062.34	2125.58	1062.29	35.2	186324608	0.334293	EIC (1062.38; 1062.87; 1063.30)±0.3 -All MS	18.6	3.34293	0.668587	0	0	0	0.334293
	H6N2P1a	6	2				1		20.0262	1477.46	738.23	1477.4	738.2	35.8	896977600	1.60931	EIC (738.21; 738.73; 739.21)±0.3 -All MS	37.7	9.65585	3.21862	0	0	0	1.60931
	H7N2P1	7	2				1		20.0262	1639.51	819.257	1639.44	819.22	35.8	1105322240	1.98311	EIC (819.24; 819.73; 820.24)±0.3 -All MS	50.1	13.8818	3.96622	0	0	0	1.98311
	H8N2P1	8	2				1		20.0262	1801.57	900.283	1801.46	900.23	36	196594752	0.352719	EIC (900.23; 900.74; 901.20)±0.3 -All MS	9.6	2.82176	0.705439	0	0	0	0.352719
	H8N3Su1	8	3			1			20.0262	2004.64	1001.82	2004.6	1001.8	38.1	148537040	0.266497	EIC (1001.79; 1002.30; 1002.80)±0.3 -All MS	9.2	2.13198	0.799491	0	0	0.266497	0
	H6N2P1b	6	2				1		20.0262	1477.46	738.23	1477.36	738.18	38.6	256930224	0.46097	EIC (738.21; 738.73; 739.21)±0.3 -All MS	11.4	2.76582	0.92194	0	0	0	0.46097
	H8N2	8	2						20.0262	1721.6	860.3	1721.56	860.28	41.2	12638879744	22.676	EIC (860.36; 860.87; 861.34)±0.3 -All MS	486.9	181.408	45.352	0	0	0	0
	H7N2a	7	2						20.0262	1559.55	779.274	1559.5	779.25	41.3	4424413696	7.93804	EIC (779.33; 779.84; 780.33)±0.3 -All MS	193.4	55.5663	15.8761	0	0	0	0
	H9N2	9	2						20.0262	1883.65	941.326	1883.6	941.3	41.9	11621706752	20.851	EIC (941.31; 941.82; 942.31)±0.3 -All MS	522.4	187.659	41.7021	0	0	0	0
	H2N2	2	2						20.0262	749.283		749.26		42.3	418839136	0.751458	EIC (749.21; 750.21; 751.33)±0.3 -All MS	24.8	1.50292	1.50292	0	0	0	0
	H7N2b	7	2						20.0262	1559.55	779.274	1559.5	779.25	42.8	1920280960	3.44526	EIC (779.33; 779.84; 780.33)±0.3 -All MS	61.6	24.1168	6.89052	0	0	0	0
	H9N2	9	2						20.0262	1883.65	941.326	1883.66	941.33	43.1	917485504	1.6461	EIC (941.31; 941.82; 942.31)±0.3 -All MS	60	14.8149	3.2922	0	0	0	0
	H6N2a	6	2						20.0262	1397.49	698.247	1397.44	698.22	43.2	5071862272	9.09966	EIC (698.28; 698.77; 699.27)±0.3 -All MS	155.5	54.5979	18.1993	0	0	0	0
	H10N2	10	2						20.0262	2045.71	1022.35	2045.62	1022.31	44.1	1375626112	2.46807	EIC (1022.33; 1022.81; 1023.35)±0.3 -All MS	87.8	24.6807	4.93615	0	0	0	0
	H4N2a	4	2						20.0262	1073.39		1073.37		44.8	146111984	0.262146	EIC (1073.46; 1074.46; 1075.46)±0.3 -All MS	11.7	1.04858	0.524292	0	0	0	0
	H6N4F1b	6	4	1					20.0262	1949.71	974.356	1949.62	974.31	45.4	124574712	0.223505	EIC (974.34; 974.84; 975.37)±0.3 -All MS	8.1	1.34103	0.89402	0.223505	0	0	0
	H6N2F1P1	6	2	1			1		20.0262	1623.52	811.259	1623.44	811.22	45.9	150660144	0.270306	EIC (811.24; 811.73; 812.25)±0.3 -All MS	11.3	1.62184	0.540612	0.270306	0	0	0.270306
	H6N3	6	3						20.0262	1600.57	799.787	1600.54	799.77	46.4	580885440	1.04219	EIC (799.77; 800.29; 800.77)±0.3 -All MS	26.5	6.25316	3.12658	0	0	0	0
	H4N2b	4	2						20.0262	1073.39		1073.36		46.9	332560352	0.596661	EIC (1073.46; 1074.46; 1075.46)±0.3 -All MS	24.4	2.38665	1.19332	0	0	0	0
	H3N5F1	3	5	1					20.0262	1666.63	832.816	1666.6	832.8	47.9	342365440	0.614253	EIC (832.80; 833.30; 833.82)±0.3 -All MS	15.2	1.84276	3.07127	0.614253	0	0	0
	H5N4c	5	4						20.0262	1641.6	820.3	1641.56	820.28	48.7	198555744	0.356238	EIC (820.30; 820.80; 821.33)±0.3 -All MS	11.2	1.78119	1.42495	0	0	0	0
	H5N3F1b	5	3	1					20.0262	1584.58	791.79	1584.52	791.76	49	221478768	0.397365	EIC (791.83; 792.31; 792.88)±0.3 -All MS	11.3	1.98682	1.19209	0.397365	0	0	0
	H3N2	3	2						20.0262	911.336		911.33		49.6	791723840	1.42047	EIC (911.39; 912.39; 913.43)±0.3 -All MS	39	4.2614	2.84093	0	0	0	0
	H3N4F1b	3	4	1					20.0262	1463.55	731.276	1463.52	731.26	50.1	210457120	0.377591	EIC (731.32; 731.83; 732.32)±0.3 -All MS	10.2	1.13277	1.51036	0.377591	0	0	0
	H5N2b	5	2						20.0262	1235.44		1235.4		51.6	1409724288	2.52925	EIC (1235.42; 1236.43; 1237.41)±0.3 -All MS	107.7	12.6462	5.0585	0	0	0	0
	H2N2F1	2	2	1					20.0262	895.341		895.34		52.4	2044587392	3.66829	EIC (895.44; 896.45; 897.43)±0.3 -All MS	91.4	7.33657	7.33657	3.66829	0	0	0
	H4N4F1b	4	4	1					20.0262	1625.61	812.303	1625.54	812.27	52.6	138504896	0.248498	EIC (812.27; 812.73; 813.31)±0.3 -All MS	7.4	0.993991	0.993991	0.248498	0	0	0
	H4N2F1	4	2	1					20.0262	1219.45		1219.4		54.8	142569952	0.255791	EIC (1219.39; 1220.38; 1221.36)±0.3 -All MS	12.7	1.02316	0.511582	0.255791	0	0	0
	H5N4F1b	5	4	1					20.0262	1787.66	893.329	1787.62	893.31	54.9	511712640	0.918087	EIC (893.39; 893.91; 894.39)±0.3 -All MS	23.3	4.59043	3.67235	0.918087	0	0	0
	H6N5F1a	6	5	1					20.0262	2152.79	1075.9	2152.72	1075.86	56.3	176855392	0.317304	EIC (1075.85; 1076.34; 1076.83)±0.3 -All MS	13	1.90383	1.58652	0.317304	0	0	0
	H3N2F1	3	2	1					20.0262	1057.39		1057.37		58.5	4531197440	8.12962	EIC (1057.48; 1058.50; 1059.49)±0.3 -All MS	275.6	24.3889	16.2592	8.12962	0	0	0
	H4N3F1S1b	4	3	1	1				20.0262	1713.62	856.311	1713.6	856.3	58.5	397290336	0.712796	EIC (856.39; 856.90; 857.37)±0.3 -All MS	18	2.85119	2.13839	0.712796	0.712796	0	0
	H6N5F1b	6	5	1					20.0262	2152.79	1075.9	2152.64	1075.82	60.7	109279504	0.196063	EIC (1075.85; 1076.34; 1076.83)±0.3 -All MS	7.5	1.17638	0.980316	0.196063	0	0	0
	H7N6F1	7	6	1					20.0262	2517.92	1258.46	2517.84	1258.42	61.1	179360256	0.321798	EIC (1258.41; 1258.94; 1259.40)±0.3 -All MS	18.9	2.25259	1.93079	0.321798	0	0	0
	H5N4F1c	5	4	1					20.0262	1787.66	893.329	1787.62	893.31	62.2	197691344	0.354687	EIC (893.39; 893.91; 894.39)±0.3 -All MS	9.3	1.77343	1.41875	0.354687	0	0	0
	H4N3F1	4	3	1					20.0262	1422.53	710.763	1422.46	710.73	63	388715360	0.697412	EIC (710.73; 711.24; 711.73; 1422.48; 1423.48; 1424.47)±0.3 -All MS	10.4	2.78965	2.09223	0.697412	0	0	0
	H4N3F1S1c	4	3	1	1				20.0262	1713.62	856.311	1713.56	856.28	64.6	313647168	0.562728	EIC (856.39; 856.90; 857.37)±0.3 -All MS	14.9	2.25091	1.68819	0.562728	0.562728	0	0
	H6N5F1c	6	5	1					20.0262	2152.79	1075.9	2152.68	1075.84	65.5	98666904	0.177023	EIC (1075.85; 1076.34; 1076.83)±0.3 -All MS	7.9	1.06214	0.885114	0.177023	0	0	0
	H4N3F1S1d	4	3	1	1				20.0262	1713.62	856.311	1713.56	856.28	67.9	269842720	0.484137	EIC (856.39; 856.90; 857.37)±0.3 -All MS	14.4	1.93655	1.45241	0.484137	0.484137	0	0
															55736859892	100			6.78283	2.14321	0.189273	0.0175966	0.00266497	0.0688802

[truncated: 21 more sheets: T.S2-9 SW480, T.S2-10 SW620, T.S2-11 SW1116, T.S2-12 KM12-VUMC, T.S2-13 SW948-VUMC, T.S2-14 LOVO, T.S2-15 LS174T-VUMC, T.S2-16 SW1463, T.S2-17 LS180, T.S2-18 CCL218, T.S2-19 T84, T.S2-20 Colo320-VUMC, T.S2-21 LS411N, T.S2-22 SW1398-VUMC, T.S2-23 C10, T.S2-24 HT29, T.S2-25 HCT8, T.S3 , T.S4, T.S5  …]
